# Supplementary material for: ExoS/ChvI Two-Component Signal-Transduction System Activated in the Absence of Bacterial Phosphatidylcholine
Source: Frontiers journal article supplement (doi:10.3389/fpls.2021.678976), 2021-07-23
Supplement: Data_Sheet_2.PDF [file Data_Sheet_2.PDF]

## ExoS/ChvI two-component signal-transduction system activated in the absence of bacterial phosphatidylcholine

### Supplementary Tables

#### Excel Table S1

**Table S1.** Complete list of *S. meliloti* genes differently expressed in the phosphatidylethanolamine-deficient mutant CS111 when compared to wild type. Tabular data (.xls) list of differentially expressed genes. M-values ( $\log_2$  ratio between both channels), P-values (*t* test) and A-values ( $\log_2$  of combined intensity of both channels) were also calculated with EMMA as described in Materials and Methods.

#### Excel Table S2

**Table S2.** Complete list of *S. meliloti* genes differently expressed in the phosphatidylcholine-deficient mutant OG10017 when compared to wild type. Tabular data (.xls) list of differentially expressed genes. M-values ( $\log_2$  ratio between both channels), P-values (*t* test) and A-values ( $\log_2$  of combined intensity of both channels) were also calculated with EMMA as described in Materials and Methods.

**Table S3.** Sequences of oligonucleotides used for quantitative real-time PCR.

| Gene                     | Forward Primer (5' to 3') | Reverse Primer (5' to 3') |
|--------------------------|---------------------------|---------------------------|
| SMb21440                 | CTCGTTGCATCGCTGACC        | TCGGGTTGGGTCTGTGTC        |
| SMc01855                 | TTCTTCGCCGGGATTGGT        | GCGTGGCAATGTCAGGTC        |
| SMb20960 ( <i>exoN</i> ) | ATCCCAGTCCTTCCACGC        | ACAGAACCATGTCGCGGA        |
| SMb20946 ( <i>exoY</i> ) | CCGCAACGACGTCTCCTA        | CGGCAGGGATCGTCTTGA        |
| SMc03015 ( <i>visN</i> ) | TCCTTGATGCTGCTCTTC        | CTCGGTCAGTTCGCATTC        |
| SMc03046 ( <i>rem</i> )  | CGAAAGCCACATCAGCAAGC      | ATTCCAGTCGATGCAGTAGCC     |
| SMc03027 ( <i>flgB</i> ) | GAAAGCGTGCTTCAGAAC        | CTGACTTCGGTCACATGC        |
| SMc03037 ( <i>flaA</i> ) | CGATTATGTCAAGGTCCA        | GCAATGGTGATGTTCGATC       |
