# Supplementary material for: ExoS/ChvI Two-Component Signal-Transduction System Activated in the Absence of Bacterial Phosphatidylcholine
Source: Frontiers journal article supplement (doi:10.3389/fpls.2021.678976), 2021-07-23
Supplement: Table_1.XLS [file Table_1.XLS]

## Sheet: 1021_vs_CS111
Reporter Name	Reporter Description	P value	M value	A value	COMPUTED:
SMb20186	-&CONSERVED HYPOTHETICAL PROTEIN&Oligo status:all filters passed&-&Well:7B20...	1.33009e-07	3.58182	9.28831	8
SMb20204	pqqA&putative pyrroloquinoline quinone synthesis protein A&Oligo status:all filters passed&-&Well:36B06...	2.37928e-07	3.16634	10.9391	8
aacC1	aacC1&gentamicin resistance gene product&Oligo status:-&-&Well:38E22...	3.8473e-05	2.28401	12.6629	8
SMb20173	-&putative methanol dehydrogenase protein, large subunit&Oligo status:all filters passed&-&Well:7O16...	0.000117609	2.20427	11.3067	8
Sm_intergen_3293	-&pSymB_ig_70 (122 bp, from 202134 to 202255) ( position: 70 to 119 )&Oligo status:all filters passed&-&Well:18G3...	0.000144263	2.01456	9.35347	8
SMb20171	-&putative S-formylglutathione hydrolase protein&Oligo status:all filters passed&-&Well:7O12...	4.15496e-05	1.45489	9.23738	8
SMb20325	thuE&probable trehalosemaltose-binding protein&Oligo status:all filters passed&-&Well:7F13...	0.00115252	1.42991	9.72753	8
SMc02156	-&CONSERVED HYPOTHETICAL PROTEIN&Oligo status:all filters passed&-&Well:28B10...	9.13674e-05	1.38737	10.4838	8
SMb20174	-&putative cytochrome c protein&Oligo status:all filters passed&-&Well:7O18...	7.98991e-07	1.37783	9.3156	8
SMc02689	-&PROBABLE ALDEHYDE DEHYDROGENASE PROTEIN&Oligo status:all filters passed&-&Well:30F24...	0.00046173	1.32843	9.70428	8
SMb20172	-&putative cytochrome c protein&Oligo status:all filters passed&-&Well:7O14...	1.08181e-06	1.23725	9.48992	8
SMb20175	-&putative methanol oxidation protein&Oligo status:all filters passed&-&Well:7O20...	2.28543e-05	1.21979	9.11334	8
Sm_intergen_3280	-&pSymB_ig_67 (179 bp, from 190796 to 190974) ( position: 6 to 55 )&Oligo status:all filters passed&-&Well:18J2...	0.00203139	1.03673	12.188	8
SMa1450	-&Probable thiolase&Oligo status:all filters passed&-&Well:3H13...	4.54725e-05	1.01892	8.85952	8
SMc02349	asfA&PUTATIVE OXIDOREDUCTASE PROTEIN&Oligo status:all filters passed&-&Well:28J05...	0.000266544	0.992474	8.28031	8
Sm_intergen_8042	-&S._meliloti_chromosome_ig_985 (537 bp, from 2156940 to 2157476) ( position: 479 to 528 )&Oligo status:all filters passed&-&Well:39D12...	2.22302e-05	0.965943	10.9765	8
SMa2113	adhC2&probable AdhC2 glutathione-dependent dehydrogenase&Oligo status:uniqueness filter failed&-&Well:36L23...	1.11962e-05	0.961905	11.0409	8
SMa0101	-&conserved hypothetical protein&Oligo status:all filters passed&-&Well:1G21...	0.00027553	0.945963	9.85428	8
Sm_intergen_5384	-&S._meliloti_chromosome_ig_1623 (330 bp, from 3509512 to 3509841) ( position: 125 to 174 )&Oligo status:all filters passed&-&Well:25B14...	8.41326e-07	0.915643	11.7	8
SMc00087	-&PUTATIVE HYDROLASE PROTEIN&Oligo status:all filters passed&-&Well:17I23...	1.88481e-05	0.901972	8.56291	8
Sm_intergen_3284	-&pSymB_ig_69 (128 bp, from 195448 to 195575) ( position: 56 to 105 )&Oligo status:all filters passed&-&Well:18N2...	0.0269083	0.872521	8.11404	8
SMb20342	-&putative aldehyde dehydrogenase protein&Oligo status:all filters passed&-&Well:7H21...	9.76636e-05	0.854402	8.64686	8
Sm_intergen_1830	-&pSymB_ig_115 (167 bp, from 332311 to 332477) ( position: 4 to 53 )&Oligo status:all filters passed&-&Well:10F19...	0.000287716	0.837756	8.53552	8
SMb20327	thuG&probable trehalosemaltose transporter permease protein&Oligo status:all filters passed&-&Well:7F17...	0.00918239	0.811096	8.94006	8
SMc03202	bkdAb&PROBABLE 2-OXOISOVALERATE DEHYDROGENASE BETA SUBUNIT PROTEIN&Oligo status:all filters passed&-&Well:32H20...	0.00356826	0.796889	9.72208	8
SMc03999	-&HYPOTHETICAL PROTEIN&Oligo status:all filters passed&-&Well:36P20...	0.000219407	0.781939	10.7495	8
SMb20170	fdh&probable glutathione-dependent formaldehyde dehydrogenase protein&Oligo status:uniqueness filter failed&-&Well:36N21...	2.65635e-05	0.771721	11.1441	8
Sm_intergen_7516	-&S._meliloti_chromosome_ig_797_rc (159 bp, from 1761019 to 1760861) ( position: 92 to 141 )&Oligo status:all filters passed&-&Well:37F3...	0.000375548	0.754421	9.94799	8
SMc04339	-&HYPOTHETICAL PROTEIN&Oligo status:all filters passed&-&Well:36C11...	1.91905e-05	0.753827	10.1132	8
Sm_intergen_7144	-&S._meliloti_chromosome_ig_687_rc (858 bp, from 1526319 to 1525462) ( position: 801 to 850 )&Oligo status:uniqueness filter failed for at least one oligo in intergenic region&-&Well:35B4...	0.012915	0.753808	8.4944	8
SMc01418	-&HYPOTHETICAL SIGNAL PEPTIDE PROTEIN&Oligo status:all filters passed&-&Well:23N11...	0.00686807	0.741555	14.7194	8
SMb20020	pdh&putative pyruvate dehydrogenase E1 component,alpha and beta subunits protein&Oligo status:all filters passed&-&Well:7G17...	0.00373684	0.734923	10.6602	8
SMc02365	degP1&PROTEASE PRECURSOR PROTEIN&Oligo status:all filters passed&-&Well:28L13...	0.000155481	0.718844	9.35521	8
SMc00196	-&PUTATIVE TRANSPORT PROTEIN TRANSMEMBRANE&Oligo status:all filters passed&-&Well:17K02...	0.00148306	0.718233	11.3948	8
SMc00982	-&PUTATIVE DIOXYGENASE PROTEIN&Oligo status:all filters passed&-&Well:23C15...	0.00434644	0.712562	11.372	8
Sm_intergen_5753	-&S._meliloti_chromosome_ig_244_rc (2407 bp, from 545715 to 543309) ( position: 541 to 590 )&Oligo status:all filters passed&-&Well:27C13...	0.00577857	0.695469	9.22607	8
SMb20162	-&putative transcriptional regulator protein&Oligo status:all filters passed&-&Well:7M20...	0.0273326	0.681724	8.21806	8
SMc03201	bkdAa&PROBABLE 2-OXOISOVALERATE DEHYDROGENASE ALPHA SUBUNIT PROTEIN&Oligo status:all filters passed&-&Well:32H18...	0.00280037	0.675111	10.0454	8
SMc03061	aglE&ALPHA-GLUCOSIDES-BINDING PERIPLASMIC ABC TRANSPORTER PROTEIN&Oligo status:all filters passed&-&Well:32C16...	0.0156927	0.665382	10.0872	8
Sm_intergen_4884	-&S._meliloti_chromosome_ig_1486 (251 bp, from 3215844 to 3216094) ( position: 100 to 149 )&Oligo status:all filters passed&-&Well:24N6...	0.00305348	0.655232	10.3005	8
Sm_intergen_5086	-&S._meliloti_chromosome_ig_1557_rc (863 bp, from 3369116 to 3368254) ( position: 588 to 637 )&Oligo status:uniqueness filter failed for at least one oligo in intergenic region&-&Well:24H19...	0.000228698	0.653382	8.45749	8
SMc01642	-&PUTATIVE PERIPLASMIC BINDING PROTEIN&Oligo status:all filters passed&-&Well:26K24...	0.00365378	0.631582	9.67553	8
SMc01169	ald&PROBABLE ALANINE DEHYDROGENASE OXIDOREDUCTASE PROTEIN&Oligo status:all filters passed&-&Well:23M08...	7.51346e-05	0.62852	10.833	8
SMa2037	-&Putative oxidoreductase&Oligo status:all filters passed&-&Well:5J10...	0.00845015	0.620766	9.46597	8
Sm_intergen_7948	-&S._meliloti_chromosome_ig_950_rc (154 bp, from 2075844 to 2075691) ( position: 6 to 55 )&Oligo status:uniqueness filter failed for at least one oligo in intergenic region&-&Well:39F6...	0.000223354	0.617741	8.88977	8
SMc02366	-&PUTATIVE TRANSCRIPTION REGULATOR PROTEIN&Oligo status:all filters passed&-&Well:28L15...	0.004691	0.614217	8.39555	8
SMc02774	-&PUTATIVE ABC TRANSPORTER PERIPLASMIC BINDING PROTEIN&Oligo status:all filters passed&-&Well:30B17...	0.0138853	0.613205	9.34477	8
Sm_intergen_1423	-&pSymA_ig_520_rc (300 bp, from 1154629 to 1154330) ( position: 246 to 295 )&Oligo status:all filters passed&-&Well:8O17...	0.00333067	0.607671	8.64694	8
SMc02350	-&CONSERVED HYPOTHETICAL PROTEIN&Oligo status:all filters passed&-&Well:28J07...	6.48707e-06	0.605197	10.7647	8
Sm_intergen_4057	-&S._meliloti_chromosome_ig_1250 (126 bp, from 2675464 to 2675589) ( position: 27 to 76 )&Oligo status:all filters passed&-&Well:21C3...	0.0503526	0.600976	8.7721	4
Sm_intergen_3865	-&S._meliloti_chromosome_ig_1173 (671 bp, from 2520322 to 2520992) ( position: 455 to 504 )&Oligo status:all filters passed&-&Well:19C15...	0.0148002	0.58298	12.9694	8
SMb20207	pqqD&putative pyrroloquinoline quinone synthesis protein D&Oligo status:all filters passed&-&Well:36C12...	3.61516e-05	0.58133	11.6249	8
Sm_intergen_6360	-&S._meliloti_chromosome_ig_426 (639 bp, from 954439 to 955077) ( position: 487 to 536 )&Oligo status:all filters passed&-&Well:31B3...	5.05712e-06	0.58117	10.1762	8
SMa1264	-&Conserved hypothetical protein&Oligo status:all filters passed&-&Well:3H12...	0.00675716	0.579329	8.4369	8
SMc01987	-&PUTATIVE DEHYDROGENASE PROTEIN&Oligo status:all filters passed&-&Well:28I23...	6.62446e-05	0.573113	11.3364	8
SMc03205	purU1&PUTATIVE FORMYLTETRAHYDROFOLATE DEFORMYLASE PROTEIN&Oligo status:all filters passed&-&Well:32J02...	0.00083483	0.569015	10.5456	8
SMa1296	adhA1&AdhA1 alcohol&Oligo status:all filters passed&-&Well:3J16...	0.0040976	0.560614	8.09433	8
SMb20292	-&hypothetical immunogenic protein&Oligo status:all filters passed&-&Well:7B11...	0.0152259	0.559017	11.0734	8
Sm_intergen_2196	-&pSymB_ig_224 (111 bp, from 608581 to 608691) ( position: 60 to 109 )&Oligo status:all filters passed&-&Well:12D18...	0.00972864	0.556738	9.69908	8
Sm_intergen_5315	-&S._meliloti_chromosome_ig_1597_rc (424 bp, from 3465632 to 3465209) ( position: 354 to 403 )&Oligo status:all filters passed&-&Well:25M9...	0.00181313	0.556608	10.155	8
SMc02379	-&PUTATIVE PERMEASE PROTEIN&Oligo status:all filters passed&-&Well:28N13...	0.00203352	0.555792	9.54866	8
SMc03813	-&PUTATIVE PERIPLASMIC BINDING ABC TRANSPORTER PROTEIN&Oligo status:all filters passed&-&Well:32L21...	0.00473754	0.54483	9.21742	8
SMc04455	ilvG&PUTATIVE ACETOLACTATE SYNTHASE ISOZYME II LARGE SUBUNIT PROTEIN&Oligo status:all filters passed&-&Well:36O01...	0.00623396	0.53382	10.0677	8
SMc04439	-&PUTATIVE GLYCINE BETAINE TRANSPORT ATP-BINDING ABC TRANSPORTER PROTEIN&Oligo status:all filters passed&-&Well:36M01...	0.00797734	0.527889	9.87026	8
SMc00586	-&CONSERVED HYPOTHETICAL PROTEIN&Oligo status:all filters passed&-&Well:20M09...	0.031351	0.524853	11.4062	8
SMb21121	ivdH&putative isovaleryl-CoA dehydrogenase protein&Oligo status:all filters passed&-&Well:11J02...	0.000408039	0.524634	10.153	8
SMb21037	-&putative oligopeptidemurein peptide ABC transporter periplasmic solute-binding protein precursor&Oligo status:all filters passed&-&Well:11K16...	0.00313044	0.522466	9.96099	8
SMb20727	-&HYPOTHETICAL PROTEIN&Oligo status:all filters passed&-&Well:36C22...	0.000446921	0.519997	11.4666	8
Sm_intergen_4527	-&S._meliloti_chromosome_ig_1389_rc (155 bp, from 2996533 to 2996379) ( position: 81 to 130 )&Oligo status:all filters passed&-&Well:22I8...	0.000668675	0.514749	8.66554	8
SMc04215	cobV&PROBABLE COBALAMIN 5'-PHOSPHATE SYNTHASE TRANSMEMBRANE PROTEIN&Oligo status:all filters passed&-&Well:34P16...	0.000828813	0.512507	10.3446	8
SMb20894	gguA&probable sugar uptake ABC transporter ATP-binding protein&Oligo status:all filters passed&-&Well:11E19...	0.0292252	0.511049	13.5994	8
SMc02377	etf&PROBABLE ELECTRON TRANSFER FLAVOPROTEIN-UBIQUINONE OXIDOREDUCTASE&Oligo status:all filters passed&-&Well:28N09...	0.000692725	0.508798	9.79244	8
SMc04306	-&HYPOTHETICAL PROTEIN&Oligo status:all filters passed&-&Well:34P05...	0.00181048	0.504818	10.9261	8
SMc01419	rpoE1&PROBABLE RNA POLYMERASE SIGMA FACTOR PROTEIN&Oligo status:all filters passed&-&Well:23N13...	0.00279451	0.502951	13.8019	8
SMc02232	-&HYPOTHETICAL TRANSMEMBRANE PROTEIN&Oligo status:all filters passed&-&Well:28J10...	0.0252977	0.502751	8.53076	8
SMa0104	-&putative ABC transporter, periplasmic solute-binding protein&Oligo status:all filters passed&-&Well:1G23...	0.0166486	0.502447	10.989	8
SMc01270	adhC1&PROBABLE ALCOHOL DEHYDROGENASE CLASS III + GLUTATHIONE-DEPENDENT FORMALDEHYDE DEHYDROGENASE PROTEIN&Oligo status:uniqueness filter failed&-&Well:38I09...	0.000471224	0.501683	11.1305	8
SMc01609	ribH2&PUTATIVE 6,7-DIMETHYL-8-RIBITYLLUMAZINE SYNTHASE PROTEIN&Oligo status:all filters passed&-&Well:26G08...	0.0152227	0.49065	11.446	8
SMa1831	-&Hypothetical protein&Oligo status:all filters passed&-&Well:5G20...	0.0259974	0.487817	8.36495	8
SMc02344	-&PUTATIVE PERIPLASMIC BINDING PROTEIN&Oligo status:all filters passed&-&Well:28H21...	0.000101364	0.472596	10.708	8
Sm_intergen_3899	-&S._meliloti_chromosome_ig_1186_rc (137 bp, from 2537887 to 2537751) ( position: 87 to 136 )&Oligo status:all filters passed&-&Well:19E17...	0.0186865	0.467899	8.13969	7
SMc03131	-&PUTATIVE AMINO ACID-BINDING PERIPLASMIC ABC TRANSPORTER PROTEIN&Oligo status:all filters passed&-&Well:32K20...	0.00527779	0.464841	13.8071	8
Sm_intergen_4093	-&S._meliloti_chromosome_ig_1261_rc (488 bp, from 2695795 to 2695308) ( position: 133 to 182 )&Oligo status:all filters passed&-&Well:21G5...	0.0339371	0.462999	10.1143	8
Sm_intergen_4824	-&S._meliloti_chromosome_ig_1485 (6791 bp, from 3208107 to 3214897) ( position: 6384 to 6433 ), rRNA operon&Oligo status:uniqueness filter failed for at least one oligo in intergenic region&-&Well:24B3...	0.00428737	0.460894	10.4633	8
Sm_intergen_63	-&pSymA_ig_112 (551 bp, from 240435 to 240985) ( position: 381 to 430 )&Oligo status:all filters passed&-&Well:2O4...	0.0164072	0.458226	8.02156	8
SMc01643	-&PUTATIVE PERMEASE ABC TRANSPORTER PROTEIN&Oligo status:all filters passed&-&Well:26M02...	0.0183759	0.455502	8.0901	8
SMc00770	potF&PROBABLE PUTRESCINE-BINDING PERIPLASMIC PROTEIN&Oligo status:all filters passed&-&Well:20F14...	0.0041647	0.454985	10.7596	8
SMc01975	-&PUTATIVE TRANSCRIPTION REGULATOR PROTEIN&Oligo status:all filters passed&-&Well:28G23...	5.53369e-05	0.454657	10.0639	8
SMc03121	-&PUTATIVE PERIPLASMIC BINDING ABC TRANSPORTER PROTEIN&Oligo status:all filters passed&-&Well:32I24...	0.000217407	0.454254	10.5812	8
SMb20019	sucB&putative dihydrolipoamide succinyltransferase protein&Oligo status:all filters passed&-&Well:7G15...	0.00256747	0.453617	9.99114	8
SMb20416	ugpB&probable ABC transporter periplasmic glycerol-3-phosphate-binding protein precursor&Oligo status:all filters passed&-&Well:9C21...	0.0304892	0.451108	8.94999	8
SMc03203	bkdB&PROBABLE LIPOAMIDE ACYLTRANSFERASE COMPONENT OF BRANCHED-CHAIN ALPHA-KETO ACID DEHYDROGENASE COMPLEX PROTEIN&Oligo status:all filters passed&-&Well:32H22...	0.0163969	0.4494	9.54819	8
Sm_intergen_3715	-&S._meliloti_chromosome_ig_1119_rc (116 bp, from 2421233 to 2421118) ( position: 51 to 100 )&Oligo status:all filters passed&-&Well:19M5...	0.00134061	0.449117	9.58606	8
SMb20993	-&putative FMNH2-dependent monooxygenase protein&Oligo status:all filters passed&-&Well:11E14...	0.00286431	0.449112	8.12925	8
Sm_intergen_3628	-&S._meliloti_chromosome_ig_1088 (243 bp, from 2349432 to 2349674) ( position: 69 to 118 )&Oligo status:all filters passed&-&Well:18F24...	0.0258383	0.446188	8.52721	8
SMb21127	-&conserved hypothetical protein&Oligo status:all filters passed&-&Well:11J14...	0.041424	0.444779	8.95029	8
Sm_intergen_3645	-&S._meliloti_chromosome_ig_1092_rc (200 bp, from 2359313 to 2359114) ( position: 50 to 99 )&Oligo status:all filters passed&-&Well:19G1...	0.0402865	0.443334	8.17627	8
Sm_intergen_4575	-&S._meliloti_chromosome_ig_1407_rc (123 bp, from 3026704 to 3026582) ( position: 56 to 105 )&Oligo status:all filters passed&-&Well:22I11...	0.0013638	0.439732	9.4049	8
Sm_intergen_5686	-&S._meliloti_chromosome_ig_224 (664 bp, from 501773 to 502436) ( position: 399 to 448 )&Oligo status:all filters passed&-&Well:27P8...	0.021677	0.433441	11.1864	8
SMc04330	mttB&PUTATIVE TRIMETHYLAMINE METHYLTRANSFERASE PROTEIN&Oligo status:all filters passed&-&Well:36A23...	0.00256327	0.428421	11.0643	8
SMc04093	acsA1&PROBABLE ACETYL-COENZYME A SYNTHETASE PROTEIN&Oligo status:all filters passed&-&Well:34O16...	0.00823863	0.422707	10.769	8
SMc02171	-&PUTATIVE PERIPLASMIC BINDING ABC TRANSPORTER PROTEIN&Oligo status:all filters passed&-&Well:28D14...	0.0137091	0.422424	8.89889	8
SMc01780	rrpP&PROBABLE H+ TRANSLOCATING PYROPHOSPHATE SYNTHASE TRANSMEMBRANE PROTEIN&Oligo status:all filters passed&-&Well:26N04...	0.00207996	0.421791	10.8552	8
Sm_intergen_5083	-&S._meliloti_chromosome_ig_1557_rc (863 bp, from 3369116 to 3368254) ( position: 100 to 149 )&Oligo status:uniqueness filter failed for at least one oligo in intergenic region&-&Well:24E19...	0.000941725	0.418327	8.68254	8
Sm_intergen_2195	-&pSymB_ig_223_rc (138 bp, from 607061 to 606924) ( position: 85 to 134 )&Oligo status:all filters passed&-&Well:12C18...	0.00117857	0.414598	8.85239	8
Sm_intergen_4909	-&S._meliloti_chromosome_ig_1494_rc (347 bp, from 3238853 to 3238507) ( position: 134 to 183 )&Oligo status:all filters passed&-&Well:24G8...	0.000139863	0.414453	9.88808	8
SMb20817	-&putative transcriptional regulator, LacI family protein&Oligo status:all filters passed&-&Well:9L01...	0.00338119	0.414228	8.17301	8
SMa0082	-&putative ABC transporter, periplasmic solute-binding protein&Oligo status:all filters passed&-&Well:1G03...	0.000964024	0.4132	10.6847	8
Sm_intergen_2242	-&pSymB_ig_236_rc (427 bp, from 636623 to 636197) ( position: 224 to 273 )&Oligo status:uniqueness filter failed for at least one oligo in intergenic region&-&Well:12B21...	7.65769e-06	0.409758	8.70509	8
SMc03211	-&PUTATIVE 4-HYDROXYPHENYLPYRUVATE DIOXYGENASE PROTEIN&Oligo status:all filters passed&-&Well:32J14...	0.00766676	0.408115	8.44865	8
Sm_intergen_8031	-&S._meliloti_chromosome_ig_981 (122 bp, from 2147034 to 2147155) ( position: 52 to 101 )&Oligo status:all filters passed&-&Well:39I11...	0.000256079	0.406323	9.87138	8
SMc02378	-&PUTATIVE PERIPLASMIC BINDING TRANSMEMBRANE PROTEIN&Oligo status:all filters passed&-&Well:28N11...	0.0415934	0.404664	12.1056	8
Sm_intergen_4615	-&S._meliloti_chromosome_ig_1419_rc (146 bp, from 3054434 to 3054289) ( position: 26 to 75 )&Oligo status:all filters passed&-&Well:22A14...	0.00374919	0.401596	9.64696	8
Sm_intergen_248	-&pSymA_ig_162 (417 bp, from 346659 to 347075) ( position: 355 to 404 )&Oligo status:all filters passed&-&Well:2H16...	0.000941701	0.398198	8.21765	8
Sm_intergen_7457	-&S._meliloti_chromosome_ig_779_rc (493 bp, from 1728411 to 1727919) ( position: 350 to 399 )&Oligo status:all filters passed&-&Well:35K23...	0.00485191	0.395723	10.0261	8
SMc02355	-&CONSERVED HYPOTHETICAL PROTEIN&Oligo status:all filters passed&-&Well:28J17...	0.00758969	0.394173	8.0351	8
SMa0002	fdoG&probable FdoG formate dehydrogenase-O alpha subunit&Oligo status:all filters passed&-&Well:1A03...	0.0459227	0.393306	8.45741	8
SMc04342	-&PUTATIVE METHYLTRANSFERASE PROTEIN&Oligo status:all filters passed&-&Well:36C17...	0.00011274	0.390704	11.6596	8
Sm_intergen_4736	-&S._meliloti_chromosome_ig_1471_rc (386 bp, from 3170213 to 3169828) ( position: 104 to 153 )&Oligo status:uniqueness filter failed for at least one oligo in intergenic region&-&Well:22J21...	0.0145446	0.388237	10.3918	8
SMb20720	-&putative sugar uptake ABC transporter periplasmic solute-binding protein precursor&Oligo status:all filters passed&-&Well:9B09...	0.0255498	0.387698	8.74889	8
Sm_intergen_4744	-&S._meliloti_chromosome_ig_1474 (1086 bp, from 3177458 to 3178543) ( position: 277 to 326 )&Oligo status:all filters passed&-&Well:22B22...	0.000860073	0.386749	9.43669	8
Sm_intergen_1966	-&pSymB_ig_170 (275 bp, from 499561 to 499835) ( position: 168 to 217 )&Oligo status:all filters passed&-&Well:12N3...	0.000455397	0.38623	8.52489	8
SMc01757	-&CONSERVED HYPOTHETICAL PROTEIN&Oligo status:all filters passed&-&Well:26J06...	0.00206821	0.38244	8.52481	8
Sm_intergen_3667	-&S._meliloti_chromosome_ig_1100 (543 bp, from 2371343 to 2371885) ( position: 392 to 441 )&Oligo status:all filters passed&-&Well:19M2...	0.00289186	0.379297	8.88589	8
SMc04018	-&PROBABLE 5'-NUCLEOTIDASE PRECURSOR (SIGNAL PEPTIDE) PROTEIN&Oligo status:all filters passed&-&Well:34G14...	0.00477956	0.379255	10.079	8
SMb20018	-&putative sugar ABC transporter periplasmic sugar-binding protein ABC TRANSPORTER&Oligo status:all filters passed&-&Well:7G13...	0.00104632	0.376826	10.4423	8
SMc01870	aqpZ1&PROBABLE AQUAPORIN Z (BACTERIAL NODULIN-LIKE INTRINSIC) TRANSMEMBRANE PROTEIN&Oligo status:all filters passed&-&Well:38K09...	0.00505576	0.376678	10.8692	8
Sm_intergen_2707	-&pSymB_ig_392_rc (417 bp, from 1116175 to 1115759) ( position: 351 to 400 )&Oligo status:all filters passed&-&Well:15C2...	0.00962226	0.37653	8.8954	8
SMc00028	-&HYPOTHETICAL TRANSMEMBRANE PROTEIN&Oligo status:all filters passed&-&Well:17A15...	0.0458247	0.375859	8.37153	8
SMa1344	-&putative ABC transporter, ATP-binding protein&Oligo status:all filters passed&-&Well:3P04...	0.0346421	0.370169	8.01373	8
SMc01420	-&HYPOTHETICAL TRANSMEMBRANE PROTEIN&Oligo status:all filters passed&-&Well:23N15...	0.006425	0.369234	10.8051	8
SMc02200	-&HYPOTHETICAL TRANSMEMBRANE PROTEIN&Oligo status:all filters passed&-&Well:28F20...	0.00214621	0.367425	9.25745	8
Sm_intergen_2763	-&pSymB_ig_414_rc (126 bp, from 1177910 to 1177785) ( position: 29 to 78 )&Oligo status:all filters passed&-&Well:15K5...	0.0119401	0.361721	9.59054	8
SMc00002	-&CONSERVED HYPOTHETICAL PROTEIN&Oligo status:all filters passed&-&Well:14N15...	6.43047e-06	0.361073	12.1726	8
Sm_intergen_7078	-&S._meliloti_chromosome_ig_67 (490 bp, from 190951 to 191440) ( position: 440 to 489 )&Oligo status:uniqueness filter failed for at least one oligo in intergenic region&-&Well:33P23...	0.00135829	0.360935	9.10045	8
SMb21133	-&putative sulfate uptake ABC transporter periplasmic solute-binding protein precursor, similar to Y11244&Oligo status:all filters passed&-&Well:11J24...	0.00199905	0.359862	8.74379	8
Sm_intergen_3544	-&S._meliloti_chromosome_ig_1062_rc (116 bp, from 2290646 to 2290531) ( position: 61 to 110 )&Oligo status:all filters passed&-&Well:18B19...	0.0192584	0.356684	8.62845	8
Sm_intergen_6601	-&S._meliloti_chromosome_ig_513 (222 bp, from 1133433 to 1133654) ( position: 76 to 125 )&Oligo status:all filters passed&-&Well:31C18...	0.00949434	0.355986	9.31716	8
Sm_intergen_861	-&pSymA_ig_363_rc (451 bp, from 799195 to 798745) ( position: 129 to 178 )&Oligo status:all filters passed&-&Well:6M6...	0.000425016	0.354078	9.12553	8
Sm_intergen_7265	-&S._meliloti_chromosome_ig_725 (187 bp, from 1607571 to 1607757) ( position: 0 to 49 )&Oligo status:all filters passed&-&Well:35K11...	0.00462306	0.354009	9.06624	8
SMb20746	-&HYPOTHETICAL PROTEIN&Oligo status:all filters passed&-&Well:36D08...	0.000314967	0.353977	10.4051	8
SMc00391	-&HYPOTHETICAL PROTEIN&Oligo status:all filters passed&-&Well:17B23...	0.01121	0.353814	10.8794	8
Sm_intergen_4052	-&S._meliloti_chromosome_ig_1248_rc (116 bp, from 2669622 to 2669507) ( position: 47 to 96 )&Oligo status:all filters passed&-&Well:21N2...	0.0113143	0.353368	11.4545	8
SMc00355	-&CONSERVED HYPOTHETICAL PROTEIN&Oligo status:all filters passed&-&Well:17L24...	0.0113821	0.350538	9.53574	8
SMa0994	-&hypothetical protein&Oligo status:all filters passed&-&Well:3A06...	0.0495428	0.347843	9.31029	8
Sm_intergen_401	-&pSymA_ig_208 (189 bp, from 443793 to 443981) ( position: 1 to 50 )&Oligo status:all filters passed&-&Well:4A2...	0.0109763	0.347408	8.02977	8
SMc04305	cobP&PROBABLE BIFUNCTIONAL COBALAMIN BIOSYNTHESIS PROTEIN (INCLUDES: COBINAMIDE KINASE AND COBINAMIDE PHOSPHATE GUANYLYLTRANSFERASE)&Oligo status:all filters passed&-&Well:34P03...	0.00807007	0.346875	10.2574	8
Sm_intergen_6441	-&S._meliloti_chromosome_ig_458_rc (165 bp, from 1026509 to 1026345) ( position: 83 to 132 )&Oligo status:all filters passed&-&Well:31C8...	0.00406886	0.346402	8.49674	8
Sm_intergen_4381	-&S._meliloti_chromosome_ig_1335_rc (372 bp, from 2897746 to 2897375) ( position: 120 to 169 )&Oligo status:uniqueness filter failed for at least one oligo in intergenic region&-&Well:21G23...	0.00185737	0.345928	10.9086	8
Sm_intergen_7456	-&S._meliloti_chromosome_ig_779_rc (493 bp, from 1728411 to 1727919) ( position: 100 to 149 )&Oligo status:all filters passed&-&Well:35J23...	0.00539073	0.344927	10.985	8
Sm_intergen_5340	-&S._meliloti_chromosome_ig_1604_rc (524 bp, from 3480151 to 3479628) ( position: 103 to 152 )&Oligo status:all filters passed&-&Well:25F11...	0.000177084	0.343482	8.39089	8
Sm_intergen_6158	-&S._meliloti_chromosome_ig_35_rc (7090 bp, from 88119 to 81030) ( position: 6502 to 6551 ), rRNA operon&Oligo status:uniqueness filter failed for at least one oligo in intergenic region&-&Well:29H14...	0.0148892	0.342545	10.3035	8
SMc02833	mepA&PUTATIVE MUREIN ENDOPEPTIDASE TRANSMEMBRANE PROTEIN&Oligo status:all filters passed&-&Well:30J17...	0.000104541	0.342454	12.0082	8
SMc01594	-&CONSERVED HYPOTHETICAL PROTEIN&Oligo status:all filters passed&-&Well:26E14...	0.0202399	0.341904	9.63611	8
SMc03880	-&CONSERVED HYPOTHETICAL PROTEIN&Oligo status:all filters passed&-&Well:34G11...	0.0020303	0.341057	9.41228	8
SMc01311	tufA&PROBABLE ELONGATION FACTOR TU PROTEIN&Oligo status:uniqueness filter failed&-&Well:38I11...	0.0208083	0.339406	13.9516	8
Sm_intergen_862	-&pSymA_ig_363_rc (451 bp, from 799195 to 798745) ( position: 350 to 399 )&Oligo status:all filters passed&-&Well:6N6...	0.000155039	0.332846	8.88849	8
Sm_intergen_5937	-&S._meliloti_chromosome_ig_310 (115 bp, from 694970 to 695084) ( position: 65 to 114 )&Oligo status:all filters passed&-&Well:27K24...	0.00251206	0.332558	8.78208	8
SMc02189	-&HYPOTHETICAL PROTEIN&Oligo status:all filters passed&-&Well:28F16...	0.00750626	0.332205	9.74368	8
SMb21181	-&putative glutaryl-CoA dehydrogenase protein&Oligo status:all filters passed&-&Well:11B19...	0.0412926	0.331981	9.66934	8
SMc03933	soxB2&PUTATIVE SARCOSINE OXIDASE SUBUNIT B PROTEIN&Oligo status:all filters passed&-&Well:34K21...	0.00243635	0.329277	10.4557	8
SMc02405	smpB&CONSERVED HYPOTHETICAL PROTEIN&Oligo status:all filters passed&-&Well:30A05...	0.0138646	0.328819	12.6226	8
Sm_intergen_3676	-&S._meliloti_chromosome_ig_1104 (497 bp, from 2380552 to 2381048) ( position: 100 to 149 )&Oligo status:uniqueness filter failed for at least one oligo in intergenic region&-&Well:19F3...	0.000937022	0.32836	9.02063	8
Sm_intergen_4579	-&S._meliloti_chromosome_ig_1408_rc (580 bp, from 3032007 to 3031428) ( position: 426 to 475 )&Oligo status:all filters passed&-&Well:22M11...	0.0506973	0.327848	8.57697	8
SMc02079	-&PUTATIVE OUTER MEMBRANE PROTEIN&Oligo status:all filters passed&-&Well:28E16...	0.0509118	0.327663	9.59404	8
SMc02250	mscL&PROBABLE LARGE-CONDUCTANCE MECHANOSENSITIVE CHANNEL TRANSMEMBRANE PROTEIN&Oligo status:all filters passed&-&Well:28L20...	0.0298785	0.327288	9.46031	8
SMc01810	-&CONSERVED HYPOTHETICAL PROTEIN&Oligo status:all filters passed&-&Well:26B15...	0.0127404	0.327072	9.17719	8
Sm_intergen_4558	-&S._meliloti_chromosome_ig_1400 (307 bp, from 3014561 to 3014867) ( position: 147 to 196 )&Oligo status:all filters passed&-&Well:22H10...	0.0295143	0.326775	9.91069	8
Sm_intergen_6845	-&S._meliloti_chromosome_ig_60 (259 bp, from 171015 to 171273) ( position: 100 to 149 )&Oligo status:uniqueness filter failed for at least one oligo in intergenic region&-&Well:33G9...	0.00503028	0.326275	9.65842	8
SMc01827	-&HYPOTHETICAL PROTEIN&Oligo status:all filters passed&-&Well:26D23...	0.000606039	0.32593	8.76838	8
Sm_intergen_2796	-&pSymB_ig_428 (289 bp, from 1228526 to 1228814) ( position: 122 to 171 )&Oligo status:all filters passed&-&Well:15L7...	0.000386913	0.324854	8.44134	8
SMc04017	omp10&PROBABLE OUTER MEMBRANE LIPOPROTEIN&Oligo status:all filters passed&-&Well:34G12...	0.000164536	0.324295	9.71891	8
SMc01798	-&CONSERVED HYPOTHETICAL PROTEIN&Oligo status:all filters passed&-&Well:26P16...	0.00192057	0.324199	8.38693	8
Sm_intergen_6018	-&S._meliloti_chromosome_ig_334 (126 bp, from 773664 to 773789) ( position: 43 to 92 )&Oligo status:all filters passed&-&Well:29L5...	0.00540013	0.323757	9.48026	8
Sm_intergen_3735	-&S._meliloti_chromosome_ig_1127 (315 bp, from 2436479 to 2436793) ( position: 137 to 186 )&Oligo status:all filters passed&-&Well:19A7...	0.000298757	0.319379	8.69117	8
SMc01421	-&HYPOTHETICAL PROTEIN&Oligo status:all filters passed&-&Well:23N17...	0.0288153	0.317312	9.5137	8
SMc01947	-&CONSERVED HYPOTHETICAL TRANSMEMBRANE PROTEIN&Oligo status:all filters passed&-&Well:28C19...	0.0281949	0.316121	9.92161	8
SMc01460	-&HYPOTHETICAL PROTEIN&Oligo status:all filters passed&-&Well:26C21...	0.0254635	0.31542	9.08008	8
SMc01645	-&PUTATIVE ABC TRANSPORTER ATP-BINDING PROTEIN&Oligo status:all filters passed&-&Well:26M06...	0.00409856	0.314002	8.65523	8
Sm_intergen_7829	-&S._meliloti_chromosome_ig_906_rc (299 bp, from 1999807 to 1999509) ( position: 105 to 154 )&Oligo status:all filters passed&-&Well:37O22...	0.00534501	0.313389	9.38921	8
Sm_intergen_4214	-&S._meliloti_chromosome_ig_1293 (6914 bp, from 2805257 to 2812170) ( position: 6380 to 6429 ), rRNA operon&Oligo status:uniqueness filter failed for at least one oligo in intergenic region&-&Well:21P12...	0.0297836	0.306112	10.6024	8
Sm_intergen_832	-&pSymA_ig_351_rc (242 bp, from 762866 to 762625) ( position: 92 to 141 )&Oligo status:all filters passed&-&Well:6P4...	0.0328602	0.305724	8.07554	8
SMb21123	-&hypothetical membrane-anchored protein, similar to putative translation initiation inhibitor&Oligo status:all filters passed&-&Well:11J06...	1.16391e-05	0.304857	10.9146	8
Sm_intergen_1384	-&pSymA_ig_511_rc (252 bp, from 1135285 to 1135034) ( position: 100 to 149 )&Oligo status:all filters passed&-&Well:8H15...	0.0408284	0.304394	8.45382	8
Sm_intergen_5599	-&S._meliloti_chromosome_ig_189_rc (119 bp, from 423198 to 423080) ( position: 1 to 50 )&Oligo status:all filters passed&-&Well:27I3...	0.00582505	0.303967	8.34561	8
SMc02345	-&PUTATIVE TRANSPORT SYSTEM PERMEASE ABC TRANSPORTER PROTEIN&Oligo status:all filters passed&-&Well:28H23...	0.000823158	0.303628	8.67491	8
SMc02115	-&HYPOTHETICAL UNKNOWN PROTEIN&Oligo status:all filters passed&-&Well:28K16...	0.0129072	0.302881	9.74442	8
SMb20037	aroE2&putative shikimate 5-dehydrogenase protein&Oligo status:all filters passed&-&Well:7K03...	0.0070789	0.302307	8.29877	8
Sm_intergen_1138	-&pSymA_ig_445_rc (788 bp, from 1005037 to 1004250) ( position: 736 to 785 )&Oligo status:all filters passed&-&Well:6B24...	0.000682673	0.301891	9.08059	8
Sm_intergen_6328	-&S._meliloti_chromosome_ig_411_rc (456 bp, from 923950 to 923495) ( position: 100 to 149 )&Oligo status:all filters passed&-&Well:31B1...	0.000879299	0.298657	10.1872	8
SMc01005	folE&PROBABLE GTP CYCLOHYDROLASE I PROTEIN&Oligo status:all filters passed&-&Well:23G13...	0.00930585	0.298639	9.38108	8
SMc01769	-&HYPOTHETICAL PROTEIN&Oligo status:all filters passed&-&Well:26L06...	0.047707	0.298607	9.96865	8
SMc03148	-&HYPOTHETICAL PROTEIN&Oligo status:all filters passed&-&Well:32O06...	0.00974399	0.298242	8.57529	8
SMc03059	folD2&PROBABLE BIFUNCTIONAL PROTEIN : METHYLENETETRAHYDROFOLATE DEHYDROGENASE ; METHENYLTETRAHYDROFOLATE CYCLOHYDROLASE&Oligo status:all filters passed&-&Well:32C12...	0.0297851	0.298174	9.01501	8
SMc04345	-&HYPOTHETICAL PROTEIN&Oligo status:all filters passed&-&Well:36C23...	0.000616389	0.298112	9.69723	8
Sm_intergen_7161	-&S._meliloti_chromosome_ig_692_rc (103 bp, from 1531837 to 1531735) ( position: 0 to 49 )&Oligo status:all filters passed&-&Well:35C5...	0.0237878	0.297195	10.2718	8
SMc01641	-&PUTATIVE ENOYL-COA HYDRATASE PROTEIN&Oligo status:all filters passed&-&Well:26K22...	0.00480388	0.29506	8.91848	8
Sm_intergen_3696	-&S._meliloti_chromosome_ig_1112 (154 bp, from 2395248 to 2395401) ( position: 90 to 139 )&Oligo status:all filters passed&-&Well:19J4...	0.00820532	0.295032	8.57545	8
SMa1835	-&Hypothetical protein&Oligo status:all filters passed&-&Well:5I02...	0.0314942	0.295022	13.9982	8
SMb20144	-&putative ABC transporter oligopeptide-binding protein&Oligo status:all filters passed&-&Well:7K08...	0.0326924	0.294774	10.7125	8
SMc00878	-&PUTATIVE TRANSCRIPTION REGULATOR PROTEIN&Oligo status:all filters passed&-&Well:20F01...	0.00579887	0.293028	9.07042	8
SMa2009	-&Hypothetical protein&Oligo status:all filters passed&-&Well:5H08...	0.00946269	0.288097	8.47272	8
SMc00329	irr&PUTATIVE IRON RESPONSE REGULATOR PROTEIN&Oligo status:all filters passed&-&Well:17H24...	0.0473034	0.287732	10.5154	8
SMa2075	-&probable extracellular solute-binding protein, family 5&Oligo status:all filters passed&-&Well:5L14...	0.00298403	0.287049	8.41788	8
Sm_intergen_4827	-&S._meliloti_chromosome_ig_1485 (6791 bp, from 3208107 to 3214897) ( position: 6687 to 6736 ), rRNA operon&Oligo status:uniqueness filter failed for at least one oligo in intergenic region&-&Well:24E3...	0.00906218	0.286334	11.4432	8
SMc04407	-&PUTATIVE TRANSPORT TRANSMEMBRANE PROTEIN&Oligo status:all filters passed&-&Well:36K03...	0.000575694	0.284674	10.581	8
SMa0203	-&putative ABC transporter&Oligo status:all filters passed&-&Well:1A14...	0.00100874	0.283716	9.3191	8
SMb21291	-&putative transcriptional regulator, lysR family protein&Oligo status:all filters passed&-&Well:14C15...	0.030933	0.282644	10.2523	8
SMc03102	-&PUTATIVE CARBON MONOXIDE DEHYDROGENASE LARGE SUBUNIT TRANSMEMBRANE PROTEIN&Oligo status:all filters passed&-&Well:32G16...	0.0297291	0.281608	9.43004	8
SMb20711	-&HYPOTHETICAL PROTEIN&Oligo status:all filters passed&-&Well:9P14...	0.0194575	0.281499	8.68904	8
SMb20819	mocE&putative ferredoxin of the Rieseke type protein&Oligo status:all filters passed&-&Well:9L05...	0.0317216	0.281351	10.358	8
Sm_intergen_3713	-&S._meliloti_chromosome_ig_1118_rc (185 bp, from 2419673 to 2419489) ( position: 135 to 184 )&Oligo status:all filters passed&-&Well:19K5...	0.00120315	0.281169	8.62725	8
SMc01946	livK&PUTATIVE LEUCINE-SPECIFIC BINDING PROTEIN PRECURSOR&Oligo status:all filters passed&-&Well:28C17...	0.0395514	0.279368	12.3389	8
SMc02524	fdsG&PUTATIVE NAD-DEPENDENT FORMATE DEHYDROGENASE GAMMA SUBUNIT PROTEIN&Oligo status:all filters passed&-&Well:30C04...	0.0290805	0.279189	9.39707	8
Sm_intergen_7459	-&S._meliloti_chromosome_ig_78_rc (115 bp, from 214914 to 214800) ( position: 30 to 79 )&Oligo status:all filters passed&-&Well:35M23...	0.00121604	0.278903	9.9947	8
SMc00045	cycF&PUTATIVE CYTOCHROME C SIGNAL PEPTIDE PROTEIN&Oligo status:all filters passed&-&Well:17C23...	0.00060022	0.278811	9.84069	8
Sm_intergen_2751	-&pSymB_ig_410_rc (534 bp, from 1168150 to 1167617) ( position: 445 to 494 )&Oligo status:all filters passed&-&Well:15O4...	0.0318121	0.2786	9.19109	8
SMc03846	acnA&PROBABLE ACONITATE HYDRATASE PROTEIN&Oligo status:all filters passed&-&Well:34A17...	0.0280721	0.278327	10.2902	8
Sm_intergen_3972	-&S._meliloti_chromosome_ig_1215 (611 bp, from 2594924 to 2595534) ( position: 354 to 403 )&Oligo status:all filters passed&-&Well:19N21...	0.0439982	0.277476	11.9145	8
Sm_intergen_3124	-&pSymB_ig_55 (143 bp, from 151053 to 151195) ( position: 0 to 49 )&Oligo status:all filters passed&-&Well:16D4...	0.0307009	0.27725	8.41131	8
SMc00729	etfB1&PUTATIVE ELECTRON TRANSFER FLAVOPROTEIN BETA-SUBUNIT BETA-ETF FLAVOPROTEIN SMALL SUBUNIT&Oligo status:uniqueness filter failed&-&Well:38G07...	0.0249734	0.277209	13.3989	8
SMc02020	-&PUTATIVE ATP BINDING ABC TRANSPORTER PROTEIN&Oligo status:all filters passed&-&Well:28K23...	0.00145953	0.274845	10.8633	8
Sm_intergen_834	-&pSymA_ig_352_rc (118 bp, from 766174 to 766057) ( position: 25 to 74 )&Oligo status:uniqueness filter failed for at least one oligo in intergenic region&-&Well:6B5...	0.00321822	0.274293	9.11891	8
SMc03839	-&HYPOTHETICAL TRANSMEMBRANE PROTEIN&Oligo status:all filters passed&-&Well:34A03...	0.0167656	0.273725	10.0002	8
SMc03878	phbB&ACETOACETYL-COA REDUCTASE PROTEIN&Oligo status:all filters passed&-&Well:34G07...	0.00514208	0.273406	10.5987	8
Sm_intergen_7538	-&S._meliloti_chromosome_ig_804_rc (356 bp, from 1770238 to 1769883) ( position: 206 to 255 )&Oligo status:all filters passed&-&Well:37L4...	0.000742791	0.27203	9.7646	8
SMc00728	etfA1&PUTATIVE ELECTRON TRANSFER FLAVOPROTEIN ALPHA-SUBUNIT ALPHA-ETF FLAVOPROTEIN&Oligo status:uniqueness filter failed&-&Well:38G05...	0.00360882	0.270675	11.2565	8
Sm_intergen_2446	-&pSymB_ig_288_rc (266 bp, from 773181 to 772916) ( position: 104 to 153 )&Oligo status:all filters passed&-&Well:13N9...	0.000357618	0.268182	10.607	8
Sm_intergen_6732	-&S._meliloti_chromosome_ig_559_rc (195 bp, from 1237866 to 1237672) ( position: 127 to 176 )&Oligo status:all filters passed&-&Well:33F2...	0.0218114	0.267671	9.7009	8
Sm_intergen_6170	-&S._meliloti_chromosome_ig_352_rc (479 bp, from 807487 to 807009) ( position: 142 to 191 )&Oligo status:all filters passed&-&Well:29D15...	0.0382164	0.267259	8.25894	8
SMc00031	-&HYPOTHETICAL/UNKNOWN TRANSMEMBRANE PROTEIN&Oligo status:all filters passed&-&Well:17A19...	0.0107206	0.267204	9.638	8
SMb20343	-&putative aldehyde dehydrogenase subunit protein&Oligo status:all filters passed&-&Well:7H23...	0.00126673	0.266367	8.9114	8
Sm_intergen_5588	-&S._meliloti_chromosome_ig_185 (105 bp, from 416370 to 416474) ( position: 43 to 92 )&Oligo status:all filters passed&-&Well:27N2...	0.0308873	0.265299	10.12	8
SMb21205	-&putative ABC transporter permease protein&Oligo status:all filters passed&-&Well:11F17...	0.00084301	0.262371	8.28101	8
SMc02775	-&PUTATIVE L-FUCOSE DEHYDROGENASE (D-THREO ALDOSE 1-DEHYDROGENASE) PROTEIN&Oligo status:all filters passed&-&Well:30B19...	0.020829	0.261661	8.09389	8
SMc04251	-&PUTATIVE MANNITOL-BINDING PERIPLASMIC SIGNAL PEPTIDE PROTEIN&Oligo status:all filters passed&-&Well:34F15...	0.014376	0.261514	12.7382	8
Sm_intergen_6043	-&S._meliloti_chromosome_ig_345 (291 bp, from 791597 to 791887) ( position: 109 to 158 )&Oligo status:all filters passed&-&Well:29E7...	0.00650184	0.261033	8.70032	8
SMc01341	-&HYPOTHETICAL/UNKNOWN PROTEIN&Oligo status:all filters passed&-&Well:36J16...	0.000549228	0.260946	9.33693	8
Sm_intergen_6598	-&S._meliloti_chromosome_ig_512 (490 bp, from 1131946 to 1132435) ( position: 373 to 422 )&Oligo status:all filters passed&-&Well:31P17...	0.03831	0.260696	11.1484	8
SMc02989	-&CONSERVED HYPOTHETICAL TRANSMEMBRANE PROTEIN&Oligo status:all filters passed&-&Well:32I15...	0.00762553	0.260616	12.1135	8
Sm_intergen_3918	-&S._meliloti_chromosome_ig_1194 (300 bp, from 2550609 to 2550908) ( position: 111 to 160 )&Oligo status:all filters passed&-&Well:19H18...	0.0266365	0.259906	8.05879	8
Sm_intergen_5414	-&S._meliloti_chromosome_ig_1635_rc (411 bp, from 3540776 to 3540366) ( position: 160 to 209 )&Oligo status:all filters passed&-&Well:25P15...	0.0146546	0.257302	10.7792	8
Sm_intergen_4947	-&S._meliloti_chromosome_ig_1508_rc (261 bp, from 3266173 to 3265913) ( position: 210 to 259 )&Oligo status:all filters passed&-&Well:24M10...	0.0351009	0.256038	10.4849	8
Sm_intergen_3817	-&S._meliloti_chromosome_ig_1155 (376 bp, from 2490652 to 2491027) ( position: 218 to 267 )&Oligo status:all filters passed&-&Well:19C12...	0.00971332	0.255187	9.436	8
Sm_intergen_3768	-&S._meliloti_chromosome_ig_1140 (1353 bp, from 2474889 to 2476241) ( position: 1263 to 1312 )&Oligo status:uniqueness filter failed for at least one oligo in intergenic region&-&Well:19B9...	0.000583794	0.254733	9.55033	8
SMa1391	etfB2&probable EtfB2 electron transport flavoprotein, beta subunit&Oligo status:uniqueness filter failed&-&Well:36J05...	0.0166877	0.254651	13.6646	8
Sm_intergen_2992	-&pSymB_ig_498_rc (259 bp, from 1395370 to 1395112) ( position: 86 to 135 )&Oligo status:all filters passed&-&Well:15P19...	0.000549202	0.253847	9.39599	8
SMc01608	-&PUTATIVE ATP-BINDING ABC TRANSPORTER PROTEIN&Oligo status:all filters passed&-&Well:26G06...	0.0138229	0.253598	9.44497	8
SMc02723	-&CONSERVED HYPOTHETICAL PROTEIN&Oligo status:all filters passed&-&Well:30L14...	0.0503965	0.249744	8.99128	8
Sm_intergen_3868	-&S._meliloti_chromosome_ig_1174 (145 bp, from 2521207 to 2521351) ( position: 30 to 79 )&Oligo status:all filters passed&-&Well:19F15...	0.0243893	0.249481	8.32612	8
Sm_intergen_8018	-&S._meliloti_chromosome_ig_976_rc (109 bp, from 2139018 to 2138910) ( position: 38 to 87 )&Oligo status:all filters passed&-&Well:39L10...	0.036502	0.247906	10.0439	8
SMa1208	fixS1&FixS1 nitrogen fixation protein&Oligo status:all filters passed&-&Well:36M22...	0.0443862	0.246443	9.83567	8
Sm_intergen_4318	-&S._meliloti_chromosome_ig_1311 (118 bp, from 2851443 to 2851560) ( position: 32 to 81 )&Oligo status:uniqueness filter failed for at least one oligo in intergenic region&-&Well:21H19...	0.0473192	0.24602	9.87191	8
SMc04304	cobW&PROBABLE COBALAMINE BIOSYNTHESIS PROTEIN&Oligo status:all filters passed&-&Well:34P01...	0.00948788	0.245913	10.508	8
SMc02738	opuB&PUTATIVE GLYCINE BETAINE TRANSPORT SYSTEM PERMEASE ABC TRANSPORTER PROTEIN&Oligo status:all filters passed&-&Well:30N18...	0.0151603	0.243366	9.76051	8
SMc03850	ccmD&PUTATIVE HEME EXPORTER D (CYTOCHROME C-TYPE BIOGENESIS PROTEIN) TRANSMEMBRANE&Oligo status:all filters passed&-&Well:36P16...	0.0125983	0.242762	10.0422	8
Sm_intergen_6971	-&S._meliloti_chromosome_ig_633 (488 bp, from 1411474 to 1411961) ( position: 210 to 259 )&Oligo status:all filters passed&-&Well:33E17...	0.00212766	0.2426	9.58458	8
Sm_intergen_7850	-&S._meliloti_chromosome_ig_912_rc (234 bp, from 2014011 to 2013778) ( position: 84 to 133 )&Oligo status:all filters passed&-&Well:37D24...	0.0189999	0.242515	10.4823	8
Sm_intergen_3604	-&S._meliloti_chromosome_ig_1079_rc (189 bp, from 2323589 to 2323401) ( position: 3 to 52 )&Oligo status:all filters passed&-&Well:18N22...	0.000803298	0.242463	9.01107	8
Sm_intergen_2084	-&pSymB_ig_196_rc (869 bp, from 567528 to 566660) ( position: 352 to 401 )&Oligo status:all filters passed&-&Well:12D11...	0.020997	0.241967	10.5441	8
SMb21007	-&HYPOTHETICAL PROTEIN&Oligo status:all filters passed&-&Well:11G18...	0.0451145	0.24	9.11267	8
SMb21134	-&putative amino acid processing enzyme, similar to low specificity D-threonine aldolase protein&Oligo status:all filters passed&-&Well:11L02...	0.0093317	0.239269	8.87915	8
Sm_intergen_836	-&pSymA_ig_353_rc (233 bp, from 771034 to 770802) ( position: 8 to 57 )&Oligo status:all filters passed&-&Well:6D5...	0.00293908	0.23837	9.52951	8
SMb20706	-&putative amino acid uptake ABC transporter periplasmic solute-binding protein precursor&Oligo status:all filters passed&-&Well:9P04...	0.0117422	0.238173	12.0839	8
Sm_intergen_5590	-&S._meliloti_chromosome_ig_186 (182 bp, from 416785 to 416966) ( position: 65 to 114 )&Oligo status:all filters passed&-&Well:27P2...	0.00708832	0.237889	9.86178	8
Sm_intergen_5601	-&S._meliloti_chromosome_ig_19_rc (303 bp, from 46280 to 45978) ( position: 104 to 153 )&Oligo status:all filters passed&-&Well:27K3...	0.03889	0.237566	8.98698	8
SMb20784	-&putative branched-chain amino acid uptake ABC transporter ATP-binding protein&Oligo status:all filters passed&-&Well:9H13...	0.0066409	0.237058	9.04083	8
Sm_intergen_7734	-&S._meliloti_chromosome_ig_872 (352 bp, from 1924385 to 1924736) ( position: 188 to 237 )&Oligo status:all filters passed&-&Well:37P16...	0.000876946	0.236901	9.72215	8
Sm_intergen_7867	-&S._meliloti_chromosome_ig_920 (264 bp, from 2031320 to 2031583) ( position: 113 to 162 )&Oligo status:all filters passed&-&Well:39E1...	0.0320922	0.236828	9.54649	8
SMa2205	-&putative ABC transporter, permease&Oligo status:all filters passed&-&Well:5D19...	0.0206052	0.236154	8.61901	8
Sm_intergen_3689	-&S._meliloti_chromosome_ig_1109_rc (110 bp, from 2392137 to 2392028) ( position: 56 to 105 )&Oligo status:all filters passed&-&Well:19C4...	0.0172789	0.235541	10.9678	8
SMa1389	etfA2&probable EtfA2 electron-transport flavoprotein, alpha-subunit&Oligo status:uniqueness filter failed&-&Well:36J03...	0.00240317	0.235474	10.776	8
Sm_intergen_2550	-&pSymB_ig_329 (189 bp, from 927792 to 927980) ( position: 130 to 179 )&Oligo status:all filters passed&-&Well:13F16...	0.0387528	0.235307	10.7556	8
Sm_intergen_7060	-&S._meliloti_chromosome_ig_663 (687 bp, from 1473489 to 1474175) ( position: 239 to 288 )&Oligo status:all filters passed&-&Well:33N22...	0.004228	0.235009	10.8772	8
Sm_intergen_5850	-&S._meliloti_chromosome_ig_280 (550 bp, from 632644 to 633193) ( position: 152 to 201 )&Oligo status:all filters passed&-&Well:27D19...	0.000929077	0.234725	9.81146	8
SMc00276	-&CONSERVED HYPOTHETICAL PROTEIN&Oligo status:all filters passed&-&Well:17D04...	0.0371079	0.234515	9.32045	8
Sm_intergen_5058	-&S._meliloti_chromosome_ig_1553 (862 bp, from 3361038 to 3361899) ( position: 622 to 671 )&Oligo status:uniqueness filter failed for at least one oligo in intergenic region&-&Well:24L17...	0.000142218	0.23432	10.2338	8
Sm_intergen_5851	-&S._meliloti_chromosome_ig_280 (550 bp, from 632644 to 633193) ( position: 399 to 448 )&Oligo status:all filters passed&-&Well:27E19...	0.00260605	0.23376	9.85995	8
Sm_intergen_5993	-&S._meliloti_chromosome_ig_326_rc (320 bp, from 754910 to 754591) ( position: 170 to 219 )&Oligo status:all filters passed&-&Well:29C4...	0.0456216	0.233161	9.22803	8
Sm_intergen_3786	-&S._meliloti_chromosome_ig_1142_rc (560 bp, from 2480428 to 2479869) ( position: 364 to 413 )&Oligo status:all filters passed&-&Well:19D10...	0.0241533	0.231873	9.32335	8
SMc02262	-&PUTATIVE AMINOTRANSFERASE PROTEIN&Oligo status:all filters passed&-&Well:28N20...	0.0214845	0.23159	9.47826	8
SMc04247	-&PUTATIVE BETA-XYLOSIDASE PROTEIN&Oligo status:all filters passed&-&Well:34F09...	0.0295332	0.231298	8.43751	8
Sm_intergen_6510	-&S._meliloti_chromosome_ig_482 (123 bp, from 1069834 to 1069956) ( position: 63 to 112 )&Oligo status:all filters passed&-&Well:31H12...	0.0169553	0.231072	8.69994	8
Sm_intergen_3382	-&S._meliloti_chromosome_ig_1001 (1991 bp, from 2179041 to 2181031) ( position: 1726 to 1775 )&Oligo status:uniqueness filter failed for at least one oligo in intergenic region&-&Well:18P8...	0.00739024	0.230608	8.55393	8
SMc01903	clpP1&PROBABLE ATP-DEPENDENT CLP PROTEASE PROTEOLYTIC SUBUNIT PROTEIN&Oligo status:all filters passed&-&Well:26N13...	0.00117577	0.229237	11.6453	8
SMc01627	-&PUTATIVE PERMEASE ABC TRANSPORTER PROTEIN&Oligo status:all filters passed&-&Well:26I18...	0.0228647	0.226081	8.05657	8
Sm_intergen_1060	-&pSymA_ig_419_rc (544 bp, from 952528 to 951985) ( position: 360 to 409 )&Oligo status:all filters passed&-&Well:6D19...	0.0134794	0.225454	8.5663	8
SMc00649	-&PUTATIVE TRNA/RRNA METHYLTRANSFERASE PROTEIN&Oligo status:all filters passed&-&Well:20E10...	0.040459	0.223747	8.58474	8
Sm_intergen_7334	-&S._meliloti_chromosome_ig_75 (218 bp, from 209547 to 209764) ( position: 68 to 117 )&Oligo status:all filters passed&-&Well:35P15...	0.0169656	0.223325	8.98145	8
Sm_intergen_7789	-&S._meliloti_chromosome_ig_894 (618 bp, from 1965083 to 1965700) ( position: 399 to 448 )&Oligo status:all filters passed&-&Well:37G20...	0.0160376	0.222593	10.3046	8
Sm_intergen_4929	-&S._meliloti_chromosome_ig_150_rc (462 bp, from 356354 to 355893) ( position: 409 to 458 )&Oligo status:all filters passed&-&Well:24K9...	0.00112457	0.222223	11.4249	8
Sm_intergen_6336	-&S._meliloti_chromosome_ig_415 (142 bp, from 930660 to 930801) ( position: 0 to 49 )&Oligo status:all filters passed&-&Well:31J1...	7.50488e-05	0.222165	9.49959	8
SMa2211	ilvB2&probable IlvB2 acetolactate synthase large subunit&Oligo status:all filters passed&-&Well:5F01...	0.0431498	0.220879	8.46499	8
SMc03858	pheAa&PUTATIVE CHORISMATE MUTASE PROTEIN&Oligo status:all filters passed&-&Well:34C15...	0.000595089	0.220851	10.8342	8
SMc04352	-&CONSERVED HYPOTHETICAL SIGNAL PEPTIDE PROTEIN&Oligo status:all filters passed&-&Well:36E11...	0.0498271	0.21825	11.6073	8
SMb20992	-&conserved hypothetical protein, similar to Y20991&Oligo status:all filters passed&-&Well:11E12...	0.026236	0.218247	8.97065	8
SMc04396	-&PUTATIVE PERIPLASMIC BINDING PROTEIN&Oligo status:all filters passed&-&Well:36I05...	0.0456343	0.217408	9.62783	8
Sm_intergen_1928	-&pSymB_ig_156 (118 bp, from 461153 to 461270) ( position: 4 to 53 )&Oligo status:all filters passed&-&Well:12H1...	0.0140519	0.216524	8.79208	8
SMc01917	nuoE1&NADH DEHYDROGENASE I CHAIN E PROTEIN&Oligo status:all filters passed&-&Well:26P15...	0.0400525	0.21542	10.059	8
SMc02052	-&CONSERVED HYPOTHETICAL PROTEIN&Oligo status:all filters passed&-&Well:36L16...	0.0391791	0.215319	10.8705	8
SMc01431	ilvI&PROBABLE ACETOLACTATE SYNTHASE ISOZYME III LARGE SUBUNIT PROTEIN&Oligo status:all filters passed&-&Well:23P13...	0.00945374	0.215047	10.777	8
SMc02245	pyrD&PROBABLE DIHYDROOROTATE DEHYDROGENASE (DIHYDROOROTATE OXIDASE) PROTEIN&Oligo status:all filters passed&-&Well:28L10...	0.0159615	0.213907	10.8879	8
SMc04249	-&HYPOTHETICAL TRANSMEMBRANE PROTEIN&Oligo status:all filters passed&-&Well:34F13...	0.0366466	0.21334	8.71679	8
SMc02259	-&PUTATIVE PERIPLASMIC BINDING ABC TRANSPORTER PROTEIN&Oligo status:all filters passed&-&Well:28N14...	0.0323385	0.212443	9.98036	8
Sm_intergen_2863	-&pSymB_ig_454 (600 bp, from 1285663 to 1286262) ( position: 464 to 513 )&Oligo status:all filters passed&-&Well:15O11...	4.54158e-05	0.2121	10.114	8
SMb20180	-&HYPOTHETICAL PROTEIN&Oligo status:all filters passed&-&Well:7B08...	0.0070578	0.211948	8.72384	8
SMc00360	-&CONSERVED HYPOTHETICAL PROTEIN&Oligo status:all filters passed&-&Well:17N10...	0.0335697	0.209069	10.516	8
SMc02243	-&HYPOTHETICAL TRANSMEMBRANE PROTEIN&Oligo status:all filters passed&-&Well:28L06...	0.028398	0.208909	12.4735	8
Sm_intergen_1592	-&pSymA_ig_57 (416 bp, from 130691 to 131106) ( position: 364 to 413 )&Oligo status:uniqueness filter failed for at least one oligo in intergenic region&-&Well:10H4...	0.0322337	0.208757	8.2523	8
Sm_intergen_7433	-&S._meliloti_chromosome_ig_773 (730 bp, from 1718585 to 1719314) ( position: 491 to 540 )&Oligo status:all filters passed&-&Well:35C22...	0.0369346	0.208675	10.1432	8
Sm_intergen_3626	-&S._meliloti_chromosome_ig_1087_rc (404 bp, from 2340828 to 2340425) ( position: 135 to 184 )&Oligo status:all filters passed&-&Well:18D24...	0.00604211	0.207728	9.72212	8
SMc04434	rpmH&PROBABLE 50S RIBOSOMAL PROTEIN L34&Oligo status:all filters passed&-&Well:36B23...	0.00839358	0.20697	12.8762	8
SMc03104	hemA&PROBABLE 5-AMINOLEVULINIC ACID SYNTHASE (DELTA-AMINOLEVULINATE SYNTHASE) (DELTA-ALA SYNTHETASE) PROTEIN&Oligo status:all filters passed&-&Well:32G20...	0.0192039	0.206325	10.3192	8
SMb20952	-&HYPOTHETICAL PROTEIN&Oligo status:all filters passed&-&Well:11O03...	0.00372607	0.205346	9.88028	8
Sm_intergen_2532	-&pSymB_ig_320 (197 bp, from 886751 to 886947) ( position: 0 to 49 )&Oligo status:all filters passed&-&Well:13D15...	0.0365116	0.204684	8.40802	8
Sm_intergen_5415	-&S._meliloti_chromosome_ig_1635_rc (411 bp, from 3540776 to 3540366) ( position: 361 to 410 )&Oligo status:all filters passed&-&Well:25A16...	0.0320195	0.204099	10.781	8
SMb20815	-&putative protein, similar to protein involved in assembly of outer membrane proteins&Oligo status:all filters passed&-&Well:9J21...	0.000475969	0.204021	8.45673	8
Sm_intergen_835	-&pSymA_ig_353 (233 bp, from 770802 to 771034) ( position: 175 to 224 )&Oligo status:all filters passed&-&Well:6C5...	0.025633	0.203983	8.02961	8
Sm_intergen_5237	-&S._meliloti_chromosome_ig_1580 (3180 bp, from 3416033 to 3419212) ( position: 2363 to 2412 )&Oligo status:uniqueness filter failed for at least one oligo in intergenic region&-&Well:25O4...	0.0205835	0.20374	8.13213	8
Sm_intergen_5045	-&S._meliloti_chromosome_ig_155 (107 bp, from 361964 to 362070) ( position: 1 to 50 )&Oligo status:all filters passed&-&Well:24O16...	0.00112693	0.203689	8.57881	8
SMb20671	-&putative sugar uptake ABC transporter periplasmic solute-binding protein precursor&Oligo status:all filters passed&-&Well:9J10...	0.0140433	0.203575	9.47443	8
SMa2347	-&conserved hypothetical protein&Oligo status:all filters passed&-&Well:5P13...	0.00535177	0.203018	9.00574	8
Sm_intergen_6406	-&S._meliloti_chromosome_ig_442_rc (403 bp, from 992038 to 991636) ( position: 350 to 399 )&Oligo status:all filters passed&-&Well:31P5...	0.0235141	0.201687	10.6851	8
Sm_intergen_3930	-&S._meliloti_chromosome_ig_12 (110 bp, from 19333 to 19442) ( position: 52 to 101 )&Oligo status:all filters passed&-&Well:19D19...	0.000721737	0.201416	10.2892	8
SMb20208	pqqE&probable pyrroloquinoline quinone synthesis protein E&Oligo status:all filters passed&-&Well:7D22...	0.00586577	0.201087	8.75958	8
Sm_intergen_7244	-&S._meliloti_chromosome_ig_716_rc (106 bp, from 1592083 to 1591978) ( position: 27 to 76 )&Oligo status:all filters passed&-&Well:35F10...	0.0134205	0.199931	9.04812	8
Sm_intergen_5253	-&S._meliloti_chromosome_ig_1580_rc (3180 bp, from 3419212 to 3416033) ( position: 2332 to 2381 )&Oligo status:uniqueness filter failed for at least one oligo in intergenic region&-&Well:25O5...	0.0117861	0.199856	8.2666	8
Sm_intergen_448	-&pSymA_ig_22_rc (184 bp, from 51262 to 51079) ( position: 128 to 177 )&Oligo status:all filters passed&-&Well:4P4...	0.0115044	0.198766	8.32515	8
SMc02756	-&PUTATIVE SENSOR HISTIDINE KINASE PROTEIN&Oligo status:all filters passed&-&Well:30P06...	0.0437128	0.198322	9.35374	8
Sm_intergen_5985	-&S._meliloti_chromosome_ig_322_rc (357 bp, from 737106 to 736750) ( position: 105 to 154 )&Oligo status:all filters passed&-&Well:29K3...	0.0073337	0.198088	8.88882	8
SMb21098	-&hypothetical membrane-anchored protein&Oligo status:all filters passed&-&Well:11F04...	0.0138415	0.197794	9.99304	8
SMc01788	-&HYPOTHETICAL PROTEIN&Oligo status:all filters passed&-&Well:26N20...	0.000783859	0.197521	10.1974	8
Sm_intergen_6173	-&S._meliloti_chromosome_ig_353_rc (105 bp, from 809186 to 809082) ( position: 0 to 49 )&Oligo status:all filters passed&-&Well:29G15...	0.0342702	0.197166	9.20627	8
SMc03068	edd&PHOSPHOGLUCONATE DEHYDRATASE PROTEIN&Oligo status:all filters passed&-&Well:32E04...	0.0373536	0.196961	9.26579	8
SMc03283	TRm18&PUTATIVE TRANSPOSASE FOR INSERTION SEQUENCE ISRM18&Oligo status:uniqueness filter failed&-&Well:38A06...	0.0285087	0.196879	14.3379	8
Sm_intergen_6208	-&S._meliloti_chromosome_ig_368 (1659 bp, from 829178 to 830836) ( position: 1018 to 1067 )&Oligo status:all filters passed&-&Well:29J17...	0.0194471	0.196682	8.74194	8
SMa1913	-&Putative transport protein&Oligo status:all filters passed&-&Well:5O06...	0.0107068	0.194853	8.10987	8
Sm_intergen_6742	-&S._meliloti_chromosome_ig_563_rc (307 bp, from 1243255 to 1242949) ( position: 56 to 105 )&Oligo status:all filters passed&-&Well:33P2...	0.00832916	0.194189	9.14982	8
Sm_intergen_1215	-&pSymA_ig_465_rc (334 bp, from 1045137 to 1044804) ( position: 184 to 233 )&Oligo status:all filters passed&-&Well:8O4...	0.0401198	0.194125	11.8859	8
Sm_intergen_4589	-&S._meliloti_chromosome_ig_1411_rc (152 bp, from 3042309 to 3042158) ( position: 1 to 50 )&Oligo status:uniqueness filter failed for at least one oligo in intergenic region&-&Well:22G12...	0.0184582	0.193821	10.4551	8
SMc04340	-&PUTATIVE OXIDOREDUCTASE PROTEIN&Oligo status:all filters passed&-&Well:36C13...	0.0151164	0.192766	12.1993	8
SMc03950	pntAa&PROBABLE PROTON-TRANSLOCATING NICOTINAMIDE NUCLEOTIDE TRANSHYDROGENASE SUBUNIT PROTEIN&Oligo status:all filters passed&-&Well:34M17...	0.00376568	0.192477	9.73093	8
Sm_intergen_2818	-&pSymB_ig_438 (209 bp, from 1246415 to 1246623) ( position: 63 to 112 )&Oligo status:all filters passed&-&Well:15B9...	0.00414283	0.1919	8.21144	8
Sm_intergen_1807	-&pSymB_ig_105_rc (313 bp, from 300703 to 300391) ( position: 143 to 192 )&Oligo status:all filters passed&-&Well:10O17...	0.0154287	0.191494	8.62988	8
Sm_intergen_4590	-&S._meliloti_chromosome_ig_1411_rc (152 bp, from 3042309 to 3042158) ( position: 101 to 150 )&Oligo status:uniqueness filter failed for at least one oligo in intergenic region&-&Well:22H12...	0.0031973	0.190029	9.35837	8
SMb20169	-&HYPOTHETICAL PROTEIN&Oligo status:all filters passed&-&Well:7O10...	0.0058433	0.189661	8.92575	8
Sm_intergen_5958	-&S._meliloti_chromosome_ig_313_rc (1067 bp, from 711589 to 710523) ( position: 810 to 859 )&Oligo status:uniqueness filter failed for at least one oligo in intergenic region&-&Well:29P1...	0.0207843	0.189227	10.2902	8
Sm_intergen_6922	-&S._meliloti_chromosome_ig_622_rc (256 bp, from 1371000 to 1370745) ( position: 120 to 169 )&Oligo status:all filters passed&-&Well:33D14...	0.00511574	0.188754	8.76616	8
Sm_intergen_7994	-&S._meliloti_chromosome_ig_967_rc (875 bp, from 2123251 to 2122377) ( position: 515 to 564 )&Oligo status:all filters passed&-&Well:39D9...	0.0415606	0.187801	10.7398	8
Sm_intergen_5603	-&S._meliloti_chromosome_ig_190_rc (280 bp, from 424367 to 424088) ( position: 120 to 169 )&Oligo status:all filters passed&-&Well:27M3...	0.025506	0.18729	11.3541	8
Sm_intergen_1564	-&pSymA_ig_561_rc (444 bp, from 1260671 to 1260228) ( position: 219 to 268 )&Oligo status:uniqueness filter failed for at least one oligo in intergenic region&-&Well:10L2...	0.0368295	0.187192	8.0651	8
SMc03879	phbA&ACETYL-COA ACETYLTRANSFERASE PROTEIN&Oligo status:all filters passed&-&Well:34G09...	0.0146862	0.187167	9.84661	8
SMa1329	-&Putative proline dipeptidase&Oligo status:all filters passed&-&Well:3N12...	0.0356734	0.186693	8.74381	8
SMc03777	proA&PROBABLE GAMMA-GLUTAMYL PHOSPHATE REDUCTASE PROTEIN&Oligo status:all filters passed&-&Well:32H01...	0.00468676	0.185394	10.1568	8
SMc00395	pfs&PUTATIVE MTA/SAH NUCLEOSIDASE P46 INCLUDES: 5'-METHYLTHIOADENOSINE NUCLEOSIDASE AND S-ADENOSYLHOMOCYSTEINE NUCLEOSIDASE PROTEIN&Oligo status:all filters passed&-&Well:17D05...	0.00401847	0.184086	11.1242	8
SMc04335	-&HYPOTHETICAL LIPOPROTEIN TRANSMEMBRANE&Oligo status:all filters passed&-&Well:36B17...	0.0342623	0.183453	10.6617	8
SMb21337	-&putative iron-sulfur-binding protein, probably subunit of an oxidoreductase like aldehyde oxidase or xanthine dehydrogenase&Oligo status:all filters passed&-&Well:14K05...	0.00041955	0.18251	11.5201	8
SMb20750	-&putative dehydrogense, possibly gluconate 5-dehydrogenase protein&Oligo status:all filters passed&-&Well:9D11...	0.0446302	0.181731	8.85935	8
SMb21685	-&HYPOTHETICAL PROTEIN&Oligo status:all filters passed&-&Well:36F16...	0.00568311	0.1813	10.0313	8
Sm_intergen_5849	-&S._meliloti_chromosome_ig_28_rc (208 bp, from 64116 to 63909) ( position: 100 to 149 )&Oligo status:all filters passed&-&Well:27C19...	0.0237378	0.180366	10.4718	8
SMc01605	-&PUTATIVE PERIPLASMIC BINDING ABC TRANSPORTER PROTEIN&Oligo status:all filters passed&-&Well:26E24...	0.0340601	0.180014	8.90543	8
SMc01930	-&CONSERVED HYPOTHETICAL PROTEIN&Oligo status:all filters passed&-&Well:28A19...	0.0341988	0.179104	9.26092	8
SMc01160	-&CONSERVED HYPOTHETICAL PROTEIN&Oligo status:all filters passed&-&Well:23K14...	0.00828613	0.177515	8.21642	8
Sm_intergen_7585	-&S._meliloti_chromosome_ig_822 (148 bp, from 1813690 to 1813837) ( position: 29 to 78 )&Oligo status:all filters passed&-&Well:37K7...	0.024638	0.176856	10.2363	8
SMb20330	thuB&probable trehalosemaltose utilization protein, function&Oligo status:all filters passed&-&Well:7F23...	0.0141884	0.176529	12.5873	8
Sm_intergen_7435	-&S._meliloti_chromosome_ig_773_rc (730 bp, from 1719314 to 1718585) ( position: 355 to 404 )&Oligo status:all filters passed&-&Well:35E22...	0.0305529	0.176414	10.2331	8
SMc03228	-&CONSERVED HYPOTHETICAL PROTEIN&Oligo status:all filters passed&-&Well:32J22...	0.0320899	0.176346	10.6202	8
Sm_intergen_6254	-&S._meliloti_chromosome_ig_382_rc (192 bp, from 858648 to 858457) ( position: 94 to 143 )&Oligo status:all filters passed&-&Well:29H20...	0.0408287	0.17595	9.45078	8
Sm_intergen_7437	-&S._meliloti_chromosome_ig_774 (178 bp, from 1720938 to 1721115) ( position: 128 to 177 )&Oligo status:uniqueness filter failed for at least one oligo in intergenic region&-&Well:35G22...	0.00960327	0.175729	9.305	8
Sm_intergen_7736	-&S._meliloti_chromosome_ig_873 (117 bp, from 1927345 to 1927461) ( position: 19 to 68 )&Oligo status:all filters passed&-&Well:37B17...	0.0156969	0.175332	9.52027	8
SMc04457	-&HYPOTHETICAL PROTEIN&Oligo status:all filters passed&-&Well:36O05...	0.0136776	0.175078	9.29545	8
SMc03859	rpsP&PROBABLE 30S RIBOSOMAL PROTEIN S16&Oligo status:all filters passed&-&Well:34C17...	2.30899e-19	0.17503	11.4352	136
Sm_intergen_5566	-&S._meliloti_chromosome_ig_175_rc (927 bp, from 399330 to 398404) ( position: 557 to 606 )&Oligo status:all filters passed&-&Well:27H1...	0.00353207	0.174716	8.70632	8
SMc03925	pgm&PROBABLE PHOSPHOGLUCOMUTASE (GLUCOSE PHOSPHOMUTASE) PROTEIN&Oligo status:all filters passed&-&Well:34K05...	0.00771865	0.174489	9.81526	8
SMc02264	-&HYPOTHETICAL TRANSMEMBRANE PROTEIN&Oligo status:all filters passed&-&Well:28N24...	0.0492866	0.174269	8.75419	8
SMc02019	-&PUTATIVE PERMEASE ABC TRANSPORTER PROTEIN&Oligo status:all filters passed&-&Well:28K21...	0.000394337	0.174219	9.70102	8
Sm_intergen_6669	-&S._meliloti_chromosome_ig_537_rc (324 bp, from 1184359 to 1184036) ( position: 100 to 149 )&Oligo status:all filters passed&-&Well:31G22...	0.000669444	0.173364	13.2242	8
Sm_intergen_7140	-&S._meliloti_chromosome_ig_687_rc (858 bp, from 1526319 to 1525462) ( position: 199 to 248 )&Oligo status:uniqueness filter failed for at least one oligo in intergenic region&-&Well:35N3...	0.0232721	0.173151	9.44821	8
SMc01809	-&PUTATIVE O-ACETYLHOMOSERINE SULFHYDRYLASE PROTEIN&Oligo status:all filters passed&-&Well:26B13...	0.0115329	0.172735	10.6178	8
SMa2261	-&hypothetical protein&Oligo status:all filters passed&-&Well:5J01...	0.0397788	0.171449	9.61114	8
Sm_intergen_6828	-&S._meliloti_chromosome_ig_594 (426 bp, from 1314962 to 1315387) ( position: 350 to 399 )&Oligo status:uniqueness filter failed for at least one oligo in intergenic region&-&Well:33F8...	0.0175422	0.17073	8.83357	8
Sm_intergen_4880	-&S._meliloti_chromosome_ig_1485_rc (6791 bp, from 3214897 to 3208107) ( position: 6670 to 6719 ), rRNA operon&Oligo status:uniqueness filter failed for at least one oligo in intergenic region&-&Well:24J6...	0.00716509	0.170493	10.9707	8
SMc04026	gltD&PROBABLE GLUTAMATE SYNTHASE SMALL CHAIN PROTEIN&Oligo status:all filters passed&-&Well:34I06...	0.0299834	0.170255	8.70119	8
SMc03088	TRm11a,TRm2011none2a&TRANSPOSASE FOR INSERTION SEQUENCE ELEMENT ISRM11/ISRM2011-2&Oligo status:uniqueness filter failed&-&Well:38E18...	0.0425118	0.170243	9.79726	8
SMc03119	-&PUTATIVE ATP-BINDING ABC TRANSPORTER PROTEIN&Oligo status:all filters passed&-&Well:32I20...	0.0194734	0.169237	8.99604	8
Sm_intergen_4232	-&S._meliloti_chromosome_ig_1293_rc (6914 bp, from 2812170 to 2805257) ( position: 2379 to 2428 ), rRNA operon&Oligo status:uniqueness filter failed for at least one oligo in intergenic region&-&Well:21B14...	0.026079	0.16826	12.5734	8
Sm_intergen_3709	-&S._meliloti_chromosome_ig_1117_rc (638 bp, from 2404360 to 2403723) ( position: 422 to 471 )&Oligo status:uniqueness filter failed for at least one oligo in intergenic region&-&Well:19G5...	0.0118649	0.16819	8.00333	8
Sm_intergen_6103	-&S._meliloti_chromosome_ig_35 (7090 bp, from 81030 to 88119) ( position: 6635 to 6684 ), rRNA operon&Oligo status:uniqueness filter failed for at least one oligo in intergenic region&-&Well:29A11...	0.0435129	0.167755	12.3035	8
Sm_intergen_4740	-&S._meliloti_chromosome_ig_1472_rc (165 bp, from 3171261 to 3171097) ( position: 112 to 161 )&Oligo status:all filters passed&-&Well:22N21...	0.00520214	0.167726	12.3088	8
SMc00589	-&CONSERVED HYPOTHETICAL PROTEIN&Oligo status:all filters passed&-&Well:20M13...	0.0141313	0.167535	9.50175	8
SMb20306	TRm2011none2&putative TRm2011-2 protein&Oligo status:all filters passed&-&Well:36C16...	0.0425413	0.167518	11.4622	8
Sm_intergen_7453	-&S._meliloti_chromosome_ig_778_rc (135 bp, from 1727335 to 1727201) ( position: 5 to 54 )&Oligo status:all filters passed&-&Well:35G23...	0.0471697	0.16748	9.23857	8
Sm_intergen_5656	-&S._meliloti_chromosome_ig_213 (291 bp, from 477130 to 477420) ( position: 186 to 235 )&Oligo status:all filters passed&-&Well:27B7...	0.00434953	0.16608	9.12592	8
Sm_intergen_1167	-&pSymA_ig_454_rc (1226 bp, from 1018587 to 1017362) ( position: 1047 to 1096 )&Oligo status:all filters passed&-&Well:8O1...	0.0380665	0.165753	8.9528	8
SMc01844	-&HYPOTHETICAL TRANSMEMBRANE PROTEIN&Oligo status:all filters passed&-&Well:26H01...	0.00334153	0.165539	8.27125	8
Sm_intergen_2594	-&pSymB_ig_347 (198 bp, from 983704 to 983901) ( position: 88 to 137 )&Oligo status:all filters passed&-&Well:13B19...	0.0196869	0.164651	8.34539	8
SMc00455	-&HYPOTHETICAL TRANSMEMBRANE PROTEIN&Oligo status:all filters passed&-&Well:17J11...	0.0472483	0.164107	10.5554	8
Sm_intergen_7284	-&S._meliloti_chromosome_ig_732_rc (307 bp, from 1623716 to 1623410) ( position: 144 to 193 )&Oligo status:all filters passed&-&Well:35N12...	0.0413072	0.163734	8.9906	8
SMc04262	gnd&PROBABLE 6-PHOSPHOGLUCONATE DEHYDROGENASE (DECARBOXYLATING) PROTEIN&Oligo status:all filters passed&-&Well:34H13...	0.0283336	0.162414	10.8371	8
SMc03065	aglK&ALPHA-GLUCOSIDES TRANSPORT ATP-BINDING ABC TRANSPORTER PROTEIN&Oligo status:all filters passed&-&Well:32C24...	0.00995042	0.162167	11.3813	8
SMb20662	-&putative oxidoreductase protein&Oligo status:all filters passed&-&Well:9H18...	0.0198846	0.161869	8.89017	8
Sm_intergen_5380	-&S._meliloti_chromosome_ig_1621 (127 bp, from 3506863 to 3506989) ( position: 73 to 122 )&Oligo status:all filters passed&-&Well:25N13...	0.0170611	0.160095	8.71675	8
Sm_intergen_4092	-&S._meliloti_chromosome_ig_1261 (488 bp, from 2695308 to 2695795) ( position: 379 to 428 )&Oligo status:all filters passed&-&Well:21F5...	0.0376231	0.159969	8.7224	8
Sm_intergen_1351	-&pSymA_ig_5_rc (1158 bp, from 16251 to 15094) ( position: 1053 to 1102 )&Oligo status:all filters passed&-&Well:8G13...	0.0140947	0.159729	9.08776	8
SMc03062	aglF&ALPHA-GLUCOSIDES TRANSPORT SYSTEM PERMEASE ABC TRANSPORTER PROTEIN&Oligo status:all filters passed&-&Well:32C18...	0.0306552	0.159297	9.41137	8
SMc01771	-&CONSERVED HYPOTHETICAL PROTEIN&Oligo status:all filters passed&-&Well:26L10...	0.0359563	0.15924	8.40242	8
Sm_intergen_7925	-&S._meliloti_chromosome_ig_942_rc (161 bp, from 2064120 to 2063960) ( position: 0 to 49 )&Oligo status:uniqueness filter failed for at least one oligo in intergenic region&-&Well:39O4...	0.0260748	0.157845	9.36764	8
Sm_intergen_5392	-&S._meliloti_chromosome_ig_1627 (386 bp, from 3522081 to 3522466) ( position: 198 to 247 )&Oligo status:all filters passed&-&Well:25J14...	0.0493931	0.157385	8.81555	8
SMc01557	-&HYPOTHETICAL SIGNAL PEPTIDE PROTEIN&Oligo status:all filters passed&-&Well:36L06...	0.0494306	0.156966	11.9616	8
Sm_intergen_213	-&pSymA_ig_153_rc (524 bp, from 335117 to 334594) ( position: 399 to 448 )&Oligo status:all filters passed&-&Well:2E14...	0.041453	0.155671	10.0423	8
SMb21445	-&putative DNA topoisomerase I protein&Oligo status:all filters passed&-&Well:14K08...	0.00610996	0.153997	10.7031	8
SMb20886	-&conserved hypothetical protein&Oligo status:all filters passed&-&Well:11E03...	0.0484366	0.151656	8.88715	8
SMc02230	-&HYPOTHETICAL TRANSMEMBRANE PROTEIN&Oligo status:all filters passed&-&Well:28J06...	0.0105043	0.151077	8.5145	8
SMc02447	-&CONSERVED HYPOTHETICAL TRANSMEMBRANE PROTEIN&Oligo status:all filters passed&-&Well:30G07...	0.0297988	0.150966	8.82275	8
Sm_intergen_1230	-&pSymA_ig_471 (291 bp, from 1064452 to 1064742) ( position: 105 to 154 )&Oligo status:all filters passed&-&Well:8N5...	0.0212513	0.149125	8.14384	8
Sm_intergen_4434	-&S._meliloti_chromosome_ig_1352 (150 bp, from 2925399 to 2925548) ( position: 91 to 140 )&Oligo status:all filters passed&-&Well:22L2...	0.0092971	0.148885	9.23284	8
Sm_intergen_6418	-&S._meliloti_chromosome_ig_448 (350 bp, from 1010436 to 1010785) ( position: 120 to 169 )&Oligo status:all filters passed&-&Well:31L6...	0.041013	0.148335	10.7018	8
Sm_intergen_6200	-&S._meliloti_chromosome_ig_364 (120 bp, from 822888 to 823007) ( position: 0 to 49 )&Oligo status:all filters passed&-&Well:29B17...	0.0500769	0.14763	10.8151	8
Sm_intergen_3881	-&S._meliloti_chromosome_ig_118 (400 bp, from 302936 to 303335) ( position: 350 to 399 )&Oligo status:all filters passed&-&Well:19C16...	0.00378866	0.147164	9.64538	8
Sm_intergen_2802	-&pSymB_ig_430 (246 bp, from 1230830 to 1231075) ( position: 90 to 139 )&Oligo status:all filters passed&-&Well:15B8...	0.0176218	0.147127	8.98557	8
SMc01458	-&PUTATIVE TRANSPORT PROTEIN&Oligo status:all filters passed&-&Well:26C17...	0.0237459	0.14691	9.32628	8
Sm_intergen_5654	-&S._meliloti_chromosome_ig_212 (196 bp, from 476048 to 476243) ( position: 60 to 109 )&Oligo status:all filters passed&-&Well:27P6...	0.0395795	0.146537	8.95086	8
SMc00479	-&PUTATIVE TRANSCRIPTION REGULATOR PROTEIN&Oligo status:all filters passed&-&Well:17N07...	0.0093472	0.146323	14.0044	8
Sm_intergen_3853	-&S._meliloti_chromosome_ig_1168_rc (114 bp, from 2514076 to 2513963) ( position: 40 to 89 )&Oligo status:all filters passed&-&Well:19G14...	0.00195917	0.145113	9.93216	8
SMb21531	-&conserved hypothetical membrane protein&Oligo status:all filters passed&-&Well:14H24...	0.0193725	0.143979	13.5044	8
Sm_intergen_5148	-&S._meliloti_chromosome_ig_1566_rc (1594 bp, from 3383404 to 3381811) ( position: 328 to 377 )&Oligo status:all filters passed&-&Well:24F23...	0.00158175	0.143903	8.76221	8
SMc01823	-&PUTATIVE ATP-BINDING ABC TRANSPORTER PROTEIN&Oligo status:all filters passed&-&Well:26D15...	0.0292347	0.143821	8.89532	8
Sm_intergen_7952	-&S._meliloti_chromosome_ig_952_rc (293 bp, from 2078764 to 2078472) ( position: 97 to 146 )&Oligo status:all filters passed&-&Well:39J6...	0.0387491	0.141994	8.73845	8
Sm_intergen_1348	-&pSymA_ig_5 (1158 bp, from 15094 to 16251) ( position: 55 to 104 )&Oligo status:all filters passed&-&Well:8D13...	0.0126511	0.14058	8.46466	8
Sm_intergen_5206	-&S._meliloti_chromosome_ig_1576 (891 bp, from 3408230 to 3409120) ( position: 362 to 411 )&Oligo status:uniqueness filter failed for at least one oligo in intergenic region&-&Well:25P2...	0.0138227	0.14049	8.42364	8
SMc03230	gcp&PROBABLE O-SIALOGLYCOPROTEIN ENDOPEPTIDASE&Oligo status:all filters passed&-&Well:32L02...	0.0152852	0.140059	11.0652	8
Sm_intergen_4165	-&S._meliloti_chromosome_ig_1292 (284 bp, from 2804012 to 2804295) ( position: 134 to 183 )&Oligo status:all filters passed&-&Well:21O9...	0.0470786	0.139224	8.63414	8
SMc00999	-&CONSERVED HYPOTHETICAL PROTEIN&Oligo status:all filters passed&-&Well:23G01...	0.0509095	0.139143	8.81957	8
Sm_intergen_872	-&pSymA_ig_368_rc (237 bp, from 815138 to 814902) ( position: 164 to 213 )&Oligo status:all filters passed&-&Well:6H7...	0.027908	0.139098	8.59701	8
SMc00280	-&CONSERVED HYPOTHETICAL PROTEIN&Oligo status:all filters passed&-&Well:17D12...	0.00198907	0.138724	10.0036	8
Sm_intergen_5959	-&S._meliloti_chromosome_ig_313_rc (1067 bp, from 711589 to 710523) ( position: 910 to 959 )&Oligo status:uniqueness filter failed for at least one oligo in intergenic region&-&Well:29A2...	0.0100544	0.137313	8.75839	8
Sm_intergen_6849	-&S._meliloti_chromosome_ig_600 (195 bp, from 1329105 to 1329299) ( position: 118 to 167 )&Oligo status:all filters passed&-&Well:33K9...	0.0219046	0.135253	11.2259	8
Sm_intergen_3175	-&pSymB_ig_569_rc (231 bp, from 1573066 to 1572836) ( position: 81 to 130 )&Oligo status:uniqueness filter failed for at least one oligo in intergenic region&-&Well:16G7...	0.0262305	0.135038	8.59247	8
Sm_intergen_1751	-&pSymA_ig_88 (570 bp, from 198536 to 199105) ( position: 138 to 187 )&Oligo status:all filters passed&-&Well:10G14...	0.00182481	0.135012	8.06313	8
SMc02688	-&CONSERVED HYPOTHETICAL PROTEIN&Oligo status:all filters passed&-&Well:30F22...	0.0490031	0.134552	10.8681	8
SMb21340	-&putative protein, similar to C-terminal part of the catalytic subunit of an oxidoreductase like aldehyde oxidase or xanthine dehydrogenase&Oligo status:all filters passed&-&Well:14K11...	0.0216362	0.133621	10.1173	8
SMb20881	-&conserved hypothetical exported protein&Oligo status:all filters passed&-&Well:11C17...	0.0362225	0.132564	8.19931	8
SMc02544	-&CONSERVED HYPOTHETICAL PROTEIN&Oligo status:all filters passed&-&Well:30C10...	0.0424602	0.132235	8.1825	8
Sm_intergen_6721	-&S._meliloti_chromosome_ig_554_rc (148 bp, from 1225300 to 1225153) ( position: 56 to 105 )&Oligo status:all filters passed&-&Well:33K1...	0.049191	0.131768	10.1653	8
Sm_intergen_6177	-&S._meliloti_chromosome_ig_355_rc (103 bp, from 813623 to 813521) ( position: 32 to 81 )&Oligo status:all filters passed&-&Well:29K15...	0.00252644	0.13148	10.4714	8
SMc02222	-&HYPOTHETICAL TRANSMEMBRANE PROTEIN&Oligo status:all filters passed&-&Well:28H14...	0.0492746	0.130191	11.8334	8
SMc04334	-&PUTATIVE FORMYLTRANSFERASE PROTEIN&Oligo status:all filters passed&-&Well:36C05...	0.0410891	0.128691	9.7195	8
Sm_intergen_304	-&pSymA_ig_179 (423 bp, from 394269 to 394691) ( position: 104 to 153 )&Oligo status:all filters passed&-&Well:2P19...	0.00551207	0.127108	8.52708	8
Sm_intergen_3238	-&pSymB_ig_594 (457 bp, from 1656018 to 1656474) ( position: 350 to 399 )&Oligo status:uniqueness filter failed for at least one oligo in intergenic region&-&Well:16F11...	0.0133091	0.127062	9.09215	8
Sm_intergen_5908	-&S._meliloti_chromosome_ig_30 (132 bp, from 66618 to 66749) ( position: 73 to 122 )&Oligo status:all filters passed&-&Well:27N22...	0.0195809	0.126625	9.27012	8
SMc03815	-&PUTATIVE ATP BINDING ABC TRANSPORTER PROTEIN&Oligo status:all filters passed&-&Well:32N01...	0.0398479	0.126533	8.49198	8
SMc00169	dme&NAD-MALIC ENZYME OXIDOREDUCTASE PROTEIN&Oligo status:all filters passed&-&Well:17G02...	0.00543385	0.126525	10.0131	8
Sm_intergen_4485	-&S._meliloti_chromosome_ig_1374_rc (138 bp, from 2970120 to 2969983) ( position: 10 to 59 )&Oligo status:all filters passed&-&Well:22O5...	0.0294614	0.125962	8.84549	8
SMb21160	hexA&putative glycosyl hydrolase, similar to beta-N-acetylhexosaminidases protein&Oligo status:all filters passed&-&Well:11P02...	0.0251754	0.125352	8.35435	8
Sm_intergen_4268	-&S._meliloti_chromosome_ig_1293_rc (6914 bp, from 2812170 to 2805257) ( position: 6581 to 6630 ), rRNA operon&Oligo status:uniqueness filter failed for at least one oligo in intergenic region&-&Well:21F16...	0.0142137	0.124857	11.9137	8
Sm_intergen_2341	-&pSymB_ig_257 (546 bp, from 675028 to 675573) ( position: 239 to 288 )&Oligo status:uniqueness filter failed for at least one oligo in intergenic region&-&Well:13E3...	0.00473234	0.124126	8.99788	8
SMc02335	-&PUTATIVE PENTOSE KINASE PROTEIN&Oligo status:all filters passed&-&Well:28H03...	0.0259708	0.123929	9.91939	8
SMb21512	-&hypothetical membrane protein&Oligo status:all filters passed&-&Well:14F10...	0.050935	0.123572	9.10675	8
Sm_intergen_7604	-&S._meliloti_chromosome_ig_827_rc (787 bp, from 1821862 to 1821076) ( position: 118 to 167 )&Oligo status:all filters passed&-&Well:37N8...	0.0434428	0.120285	9.21726	8
SMc02346	-&PUTATIVE ATP-BINDING ABC TRANSPORTER PROTEIN&Oligo status:all filters passed&-&Well:28J01...	0.0378004	0.119775	9.68419	8
SMb21132	-&putative sulfate uptake ABC transporter permease protein&Oligo status:all filters passed&-&Well:11J22...	0.0188259	0.119637	9.71778	8
SMc02326	-&HYPOTHETICAL PROTEIN&Oligo status:all filters passed&-&Well:28F15...	0.00376048	0.119423	10.511	8
SMc01187	rlpA&PUTATIVE RARE LIPOPROTEIN A PRECURSOR&Oligo status:all filters passed&-&Well:23O20...	0.000819313	0.119389	10.5589	8
Sm_intergen_431	-&pSymA_ig_215 (544 bp, from 460163 to 460706) ( position: 126 to 175 )&Oligo status:all filters passed&-&Well:4O3...	0.0402673	0.118288	8.14029	8
Sm_intergen_6985	-&S._meliloti_chromosome_ig_639 (105 bp, from 1430499 to 1430603) ( position: 38 to 87 )&Oligo status:all filters passed&-&Well:33C18...	0.0166427	0.11817	8.78846	8
Sm_intergen_8051	-&S._meliloti_chromosome_ig_989 (117 bp, from 2162803 to 2162919) ( position: 52 to 101 )&Oligo status:all filters passed&-&Well:39M12...	0.00195546	0.117411	9.99961	8
SMc01192	metS&PROBABLE METHIONYL-TRNA SYNTHETASE (METHIONINE--TRNA LIGASE) PROTEIN&Oligo status:all filters passed&-&Well:23B08...	0.0282277	0.117318	9.64698	8
Sm_intergen_4704	-&S._meliloti_chromosome_ig_1458 (121 bp, from 3130937 to 3131057) ( position: 0 to 49 )&Oligo status:all filters passed&-&Well:22J19...	0.0317084	0.117069	8.5732	8
SMb21383	-&putative SDR family dehydrogenase protein&Oligo status:all filters passed&-&Well:14C02...	0.0157164	0.117064	11.0568	8
Sm_intergen_2458	-&pSymB_ig_292 (209 bp, from 786429 to 786637) ( position: 62 to 111 )&Oligo status:all filters passed&-&Well:13J10...	0.0164777	0.117016	8.97869	8
SMc01986	-&HYPOTHETICAL TRANSMEMBRANE PROTEIN&Oligo status:all filters passed&-&Well:28I21...	0.00771372	0.115745	9.65612	8
Sm_intergen_6712	-&S._meliloti_chromosome_ig_553 (606 bp, from 1222306 to 1222911) ( position: 100 to 149 )&Oligo status:uniqueness filter failed for at least one oligo in intergenic region&-&Well:33B1...	0.0288214	0.115432	10.526	8
SMc02181	putA&BIFUNCTIONAL: PROLINE DEHYDROGENASE AND DELTA-1-PYRROLINE-5-CARBOXYLATE DEHYDROGENASE PROTEIN&Oligo status:all filters passed&-&Well:28F10...	0.00903113	0.11539	8.91193	8
Sm_intergen_4612	-&S._meliloti_chromosome_ig_1418_rc (713 bp, from 3052186 to 3051474) ( position: 376 to 425 )&Oligo status:uniqueness filter failed for at least one oligo in intergenic region&-&Well:22N13...	0.0334675	0.115295	13.2584	8
SMb20853	-&putative sugar-alcohol dehydrogenase, probably galactitol-1-phosphate 5-dehydrogenase protein&Oligo status:all filters passed&-&Well:9P09...	0.0162573	0.11503	8.20731	8
Sm_intergen_4993	-&S._meliloti_chromosome_ig_1528 (257 bp, from 3311450 to 3311706) ( position: 63 to 112 )&Oligo status:all filters passed&-&Well:24K13...	0.0454077	0.114062	8.9805	8
Sm_intergen_2184	-&pSymB_ig_22 (149 bp, from 63847 to 63995) ( position: 50 to 99 )&Oligo status:all filters passed&-&Well:12H17...	0.000899144	0.111078	8.8985	8
SMa2034	-&Hypothetical protein&Oligo status:all filters passed&-&Well:5J08...	0.0291809	0.108865	8.45254	8
SMc03193	cobG&PROBABLE COBALAMIN BIOSYNTHESIS PROTEIN&Oligo status:all filters passed&-&Well:32H02...	0.0190102	0.108623	8.72308	8
SMc00018	rnhA1&PROBABLE RIBONUCLEASE HI PROTEIN&Oligo status:all filters passed&-&Well:14P17...	0.0362558	0.108574	13.9417	8
SMc03930	soxG2&PUTATIVE SARCOSINE OXIDASE GAMMA SUBUNIT PROTEIN&Oligo status:all filters passed&-&Well:34K15...	0.00863037	0.106745	11.8944	8
Sm_intergen_4764	-&S._meliloti_chromosome_ig_1479_rc (359 bp, from 3189307 to 3188949) ( position: 28 to 77 )&Oligo status:all filters passed&-&Well:22F23...	0.0149534	0.106411	8.66075	8
SMc00820	-&PUTATIVE TRANSCRIPTIONAL REGULATOR PROTEIN&Oligo status:all filters passed&-&Well:20N14...	0.0252056	0.105039	10.1895	8
Sm_intergen_6299	-&S._meliloti_chromosome_ig_400_rc (127 bp, from 907157 to 907031) ( position: 68 to 117 )&Oligo status:all filters passed&-&Well:29E23...	0.0437581	0.10193	10.1131	8
SMc00338	-&CONSERVED HYPOTHETICAL PROTEIN&Oligo status:all filters passed&-&Well:17J18...	0.0293203	0.101746	8.30433	8
SMc00363	rpmI&PROBABLE 50S RIBOSOMAL PROTEIN L35&Oligo status:all filters passed&-&Well:17N16...	5.74797e-06	0.101744	12.5684	136
Sm_intergen_1846	-&pSymB_ig_120 (354 bp, from 340376 to 340729) ( position: 199 to 248 )&Oligo status:all filters passed&-&Well:10F20...	0.00409932	0.0986514	12.5557	8
SMc01456	-&HYPOTHETICAL TRANSMEMBRANE PROTEIN&Oligo status:all filters passed&-&Well:26C13...	0.0123655	0.0985807	8.24578	8
SMb20279	-&HYPOTHETICAL PROTEIN&Oligo status:all filters passed&-&Well:7P08...	0.031003	0.0979154	9.25862	8
Sm_intergen_1532	-&pSymA_ig_55 (320 bp, from 127766 to 128085) ( position: 132 to 181 )&Oligo status:all filters passed&-&Well:8L24...	0.03927	0.0978704	8.59962	8
Sm_intergen_2018	-&pSymB_ig_184 (434 bp, from 543548 to 543981) ( position: 161 to 210 )&Oligo status:uniqueness filter failed for at least one oligo in intergenic region&-&Well:12B7...	0.00492808	0.0961328	11.1896	8
Sm_intergen_7178	-&S._meliloti_chromosome_ig_70 (278 bp, from 197048 to 197325) ( position: 159 to 208 )&Oligo status:all filters passed&-&Well:35D6...	0.00633264	0.0945889	12.3346	8
SMc04258	-&PUTATIVE TRANSPORT SYSTEM PERMEASE ABC TRANSPORTER PROTEIN&Oligo status:all filters passed&-&Well:34H05...	0.0142649	0.0934174	10.3192	8
SMb20484	-&putative ABC transporter periplasmic sugar-binding protein&Oligo status:all filters passed&-&Well:9O01...	0.0301704	0.0917006	10.2052	8
Sm_intergen_4588	-&S._meliloti_chromosome_ig_1411 (152 bp, from 3042158 to 3042309) ( position: 45 to 94 )&Oligo status:uniqueness filter failed for at least one oligo in intergenic region&-&Well:22F12...	0.0451743	0.0900504	8.24443	8
Sm_intergen_3892	-&S._meliloti_chromosome_ig_1183 (164 bp, from 2532076 to 2532239) ( position: 100 to 149 )&Oligo status:all filters passed&-&Well:19N16...	0.000156819	0.0884573	8.31587	8
Sm_intergen_5953	-&S._meliloti_chromosome_ig_313_rc (1067 bp, from 711589 to 710523) ( position: 114 to 163 )&Oligo status:uniqueness filter failed for at least one oligo in intergenic region&-&Well:29K1...	0.0285293	0.0866825	11.3422	8
SMc01969	-&PUTATIVE AMINOTRANSFERASE PROTEIN&Oligo status:all filters passed&-&Well:28G11...	0.0478088	0.0860067	14.2735	8
Sm_intergen_2944	-&pSymB_ig_48 (482 bp, from 131686 to 132167) ( position: 350 to 399 )&Oligo status:uniqueness filter failed for at least one oligo in intergenic region&-&Well:15P16...	0.0256434	0.0857462	10.7158	8
Sm_intergen_3976	-&S._meliloti_chromosome_ig_1216_rc (185 bp, from 2599454 to 2599270) ( position: 86 to 135 )&Oligo status:all filters passed&-&Well:19B22...	0.0193799	0.0838376	9.72887	8
Sm_intergen_6050	-&S._meliloti_chromosome_ig_348 (456 bp, from 797775 to 798230) ( position: 350 to 399 )&Oligo status:all filters passed&-&Well:29L7...	0.0256845	0.0822609	9.11339	8
Sm_intergen_1012	-&pSymA_ig_406_rc (881 bp, from 917367 to 916487) ( position: 830 to 879 )&Oligo status:all filters passed&-&Well:6D16...	0.047818	0.0808006	8.80975	8
Sm_intergen_6223	-&S._meliloti_chromosome_ig_369_rc (254 bp, from 835041 to 834788) ( position: 122 to 171 )&Oligo status:all filters passed&-&Well:29I18...	0.0276104	0.0785613	8.9721	8
Sm_intergen_8019	-&S._meliloti_chromosome_ig_977 (525 bp, from 2140592 to 2141116) ( position: 111 to 160 )&Oligo status:all filters passed&-&Well:39M10...	0.0284122	0.0780672	10.4008	8
SMc02618	-&CONSERVED HYPOTHETICAL TRANSMEMBRANE PROTEIN&Oligo status:all filters passed&-&Well:30O10...	0.0190506	0.0733988	12.3201	8
Sm_intergen_4660	-&S._meliloti_chromosome_ig_1439 (223 bp, from 3094868 to 3095090) ( position: 75 to 124 )&Oligo status:all filters passed&-&Well:22N16...	0.0359898	0.0725303	10.3602	8
Sm_intergen_3809	-&S._meliloti_chromosome_ig_1151 (140 bp, from 2487554 to 2487693) ( position: 34 to 83 )&Oligo status:all filters passed&-&Well:19K11...	0.0461464	0.0724795	11.0332	8
SMc03140	-&PUTATIVE TRANSCRIPTION REGULATOR PROTEIN&Oligo status:all filters passed&-&Well:32M14...	0.0276673	0.0704058	9.6885	8
SMb20856	-&putative sugar uptake ABC transporter periplasmic solute-binding protein precursor&Oligo status:all filters passed&-&Well:9P15...	0.0328171	0.0689443	9.92186	8
Sm_intergen_8011	-&S._meliloti_chromosome_ig_973 (111 bp, from 2132307 to 2132417) ( position: 54 to 103 )&Oligo status:all filters passed&-&Well:39E10...	0.037802	0.0675283	9.38504	8
Sm_intergen_5558	-&S._meliloti_chromosome_ig_174 (193 bp, from 397946 to 398138) ( position: 3 to 52 )&Oligo status:all filters passed&-&Well:25P24...	0.0465646	0.0655244	13.4721	8
Sm_intergen_2922	-&pSymB_ig_476 (550 bp, from 1332220 to 1332769) ( position: 371 to 420 )&Oligo status:all filters passed&-&Well:15J15...	0.0452103	0.0642185	8.47837	8
Sm_intergen_3310	-&pSymB_ig_78_rc (219 bp, from 225378 to 225160) ( position: 97 to 146 )&Oligo status:all filters passed&-&Well:18H4...	0.0316956	0.0635778	8.18904	8
SMc03979	gap&PROBABLE GLYCERALDEHYDE 3-PHOSPHATE DEHYDROGENASE PROTEIN&Oligo status:all filters passed&-&Well:34A18...	0.0153396	0.038662	12.268	136
spotting buffer	-&-&Oligo status:-&spotting buffer&Well:11A01...	8.68274e-21	-0.0439887	10.378	2608
Sm_intergen_3015	-&pSymB_ig_507_rc (262 bp, from 1414210 to 1413949) ( position: 100 to 149 )&Oligo status:all filters passed&-&Well:15G21...	3.21501e-05	-0.0504007	11.9681	8
Sm_intergen_999	-&pSymA_ig_404 (190 bp, from 913126 to 913315) ( position: 80 to 129 )&Oligo status:uniqueness filter failed for at least one oligo in intergenic region&-&Well:6G15...	0.00697429	-0.057491	9.20035	8
SMc00731	-&CONSERVED HYPOTHETICAL PROTEIN&Oligo status:all filters passed&-&Well:20B16...	0.0119987	-0.0629332	9.24056	8
Sm_intergen_3936	-&S._meliloti_chromosome_ig_1201 (102 bp, from 2566681 to 2566782) ( position: 10 to 59 )&Oligo status:all filters passed&-&Well:19J19...	0.0411367	-0.0647683	8.17741	8
Sm_intergen_1386	-&pSymA_ig_512 (466 bp, from 1137080 to 1137545) ( position: 408 to 457 )&Oligo status:all filters passed&-&Well:8J15...	0.0345717	-0.0649921	9.51924	8
SMb21200	-&putative two-component response regulator protein&Oligo status:all filters passed&-&Well:11F07...	0.0439801	-0.0673749	9.71924	8
SMc00854	-&HYPOTHETICAL/UNKNOWN SIGNAL PEPTIDE PROTEIN&Oligo status:all filters passed&-&Well:20B07...	0.00797265	-0.0692073	9.36698	8
SMb21599	-&hypothetical exported protein&Oligo status:all filters passed&-&Well:14D13...	0.0175206	-0.0731967	9.51933	8
SMc01009	-&CONSERVED HYPOTHETICAL PROTEIN&Oligo status:all filters passed&-&Well:23G21...	0.0361102	-0.0739061	8.12031	8
Sm_intergen_6195	-&S._meliloti_chromosome_ig_361_rc (317 bp, from 820589 to 820273) ( position: 157 to 206 )&Oligo status:all filters passed&-&Well:29M16...	0.0469673	-0.0755619	9.69232	8
Sm_intergen_4393	-&S._meliloti_chromosome_ig_134 (142 bp, from 327249 to 327390) ( position: 1 to 50 )&Oligo status:all filters passed&-&Well:21C24...	0.00501885	-0.0755984	8.53494	8
SMa0594	-&hypothetical protein&Oligo status:all filters passed&-&Well:1B13...	0.0330829	-0.0757937	10.7478	8
SMa2091	-&hypothetical protein&Oligo status:all filters passed&-&Well:5N06...	0.0453019	-0.0759036	8.2912	8
Sm_intergen_3287	-&pSymB_ig_7 (649 bp, from 30010 to 30658) ( position: 432 to 481 )&Oligo status:uniqueness filter failed for at least one oligo in intergenic region&-&Well:18A3...	0.026184	-0.0763497	8.71284	8
Sm_intergen_3016	-&pSymB_ig_508 (128 bp, from 1415367 to 1415494) ( position: 75 to 124 )&Oligo status:all filters passed&-&Well:15H21...	0.0359949	-0.07669	9.58357	8
SMc00488	purL&PROBABLE PHOSPHORIBOSYLFORMYL GLYCINAMIDINE SYNTHETASE II PROTEIN&Oligo status:all filters passed&-&Well:17P01...	0.0252166	-0.0778663	9.57294	8
SMa0278	-&hypothetical protein&Oligo status:all filters passed&-&Well:1G22...	0.0133375	-0.0786765	8.30913	8
SMb21444	-&conserved hypothetical protein, homolog to osmotically inducible sensory protein SMC22-1 (AF178441)&Oligo status:all filters passed&-&Well:14K06...	0.0235366	-0.0793235	10.7114	8
SMb21516	-&conserved hypothetical protein&Oligo status:all filters passed&-&Well:14F18...	0.00895996	-0.079618	8.23065	8
SMc02311	maf&PUTATIVE SEPTUM FORMATION PROTEIN&Oligo status:all filters passed&-&Well:28D09...	0.0475807	-0.0800838	10.3473	8
Sm_intergen_348	-&pSymA_ig_193 (1149 bp, from 408106 to 409254) ( position: 988 to 1037 )&Oligo status:all filters passed&-&Well:2L22...	0.0292799	-0.0805179	8.02612	8
SMc02416	-&PUTATIVE HYDROLASE PROTEIN&Oligo status:all filters passed&-&Well:30A21...	0.0374653	-0.0829332	9.47252	8
SMb20772	pdxA2&putative pyridoxal phosphate biosynthetic protein&Oligo status:all filters passed&-&Well:9H03...	0.0391608	-0.0832669	11.2616	8
Sm_intergen_1726	-&pSymA_ig_78_rc (102 bp, from 180910 to 180809) ( position: 1 to 50 )&Oligo status:all filters passed&-&Well:10N12...	0.00594303	-0.0843274	8.24295	8
SMc01988	-&HYPOTHETICAL PROTEIN&Oligo status:all filters passed&-&Well:28K01...	0.00506672	-0.0849794	9.07184	8
Sm_intergen_5324	-&S._meliloti_chromosome_ig_160 (631 bp, from 369737 to 370367) ( position: 128 to 177 )&Oligo status:uniqueness filter failed for at least one oligo in intergenic region&-&Well:25F10...	0.0248125	-0.0878212	10.668	8
SMc00399	corA1&PROBABLE MAGNESIUM AND COBALT TRANSPORT TRANSMEMBRANE PROTEIN&Oligo status:all filters passed&-&Well:17D11...	0.0228764	-0.0880773	8.96314	8
Sm_intergen_975	-&pSymA_ig_401 (142 bp, from 906672 to 906813) ( position: 51 to 100 )&Oligo status:all filters passed&-&Well:6O13...	0.0107942	-0.0880842	8.29941	8
SMa2147	-&hypothetical protein&Oligo status:all filters passed&-&Well:5B13...	0.0108095	-0.0891144	11.0518	8
SMa1440	-&5-dehydro-4-deoxyglucarate dehydratase&Oligo status:all filters passed&-&Well:3H05...	0.049962	-0.089593	10.1287	8
SMc00571	fabD&PROBABLE MALONYL COA-ACYL CARRIER PROTEIN TRANSACYLASE&Oligo status:all filters passed&-&Well:20K05...	0.0424672	-0.0898856	12.645	8
SMc01434	-&HYPOTHETICAL PROTEIN&Oligo status:all filters passed&-&Well:23P19...	0.0482215	-0.089993	8.6932	8
SMb20608	-&putative transcriptional regulator, ArsR family protein&Oligo status:all filters passed&-&Well:9B08...	0.0377235	-0.0903192	8.87983	8
SMc00251	-&HYPOTHETICAL PROTEIN&Oligo status:all filters passed&-&Well:17O02...	0.0468664	-0.0908507	8.78343	8
SMc04362	-&PUTATIVE TRANSPORT PROTEIN&Oligo status:all filters passed&-&Well:36E21...	0.0259684	-0.0909101	10.8883	8
Sm_intergen_4729	-&S._meliloti_chromosome_ig_1469_rc (171 bp, from 3160885 to 3160715) ( position: 16 to 65 )&Oligo status:all filters passed&-&Well:22C21...	0.025991	-0.0909327	8.0631	8
SMb21479	-&HYPOTHETICAL PROTEIN&Oligo status:all filters passed&-&Well:14O20...	0.0118112	-0.0909697	9.8849	8
SMb21536	-&conserved hypothetical membrane protein&Oligo status:all filters passed&-&Well:14J10...	0.00964691	-0.0911718	8.3534	8
Sm_intergen_6019	-&S._meliloti_chromosome_ig_334_rc (126 bp, from 773789 to 773664) ( position: 1 to 50 )&Oligo status:all filters passed&-&Well:29M5...	0.026299	-0.0915944	8.1328	8
SMb20293	-&HYPOTHETICAL PROTEIN&Oligo status:all filters passed&-&Well:7B13...	0.00281394	-0.0920718	10.8531	8
Sm_intergen_2541	-&pSymB_ig_324_rc (199 bp, from 908169 to 907971) ( position: 0 to 49 )&Oligo status:all filters passed&-&Well:13M15...	0.0490778	-0.0921606	8.68907	8
SMa1935	wrbA3&probable WrbA3 Trp repressor binding protein&Oligo status:all filters passed&-&Well:5B04...	0.00341906	-0.0922784	9.10558	8
SMb20701	-&conserved hypothetical protein&Oligo status:all filters passed&-&Well:9N18...	0.0059812	-0.0924353	8.70253	8
SMb21104	-&putative sugar uptake ABC transporter permease protein&Oligo status:all filters passed&-&Well:11F16...	0.0379842	-0.0928165	9.51922	8
SMc02184	-&HYPOTHETICAL TRANSCRIPTION REGULATOR PROTEIN&Oligo status:all filters passed&-&Well:28F12...	0.00119528	-0.0965425	8.11353	8
SMb20247	-&putative oxidoreductase protein&Oligo status:all filters passed&-&Well:7J18...	0.0127257	-0.0969344	11.2362	8
SMc00120	-&CONSERVED HYPOTHETICAL PROTEIN&Oligo status:all filters passed&-&Well:17O09...	0.0429692	-0.0969535	10.731	8
Sm_intergen_4429	-&S._meliloti_chromosome_ig_135_rc (124 bp, from 329317 to 329194) ( position: 57 to 106 )&Oligo status:all filters passed&-&Well:22G2...	0.01699	-0.0970324	10.4789	8
Sm_intergen_6588	-&S._meliloti_chromosome_ig_508_rc (427 bp, from 1124780 to 1124354) ( position: 371 to 420 )&Oligo status:all filters passed&-&Well:31F17...	0.0462125	-0.0980832	8.78443	8
Sm_intergen_2211	-&pSymB_ig_23 (1661 bp, from 64984 to 66644) ( position: 1048 to 1097 )&Oligo status:all filters passed&-&Well:12C19...	0.0150053	-0.0990835	9.12232	8
SMb20841	-&hypothetical membrane-anchored protein&Oligo status:all filters passed&-&Well:9N17...	0.00942684	-0.0993374	9.94717	8
Sm_intergen_4728	-&S._meliloti_chromosome_ig_1469 (171 bp, from 3160715 to 3160885) ( position: 99 to 148 )&Oligo status:all filters passed&-&Well:22B21...	0.00271478	-0.099506	10.4446	8
SMb21031	-&hypothetical membrane-anchored protein&Oligo status:all filters passed&-&Well:11K06...	0.0185376	-0.0997385	9.76735	8
SMb20487	-&putative sugar ABC transporter permease protein&Oligo status:all filters passed&-&Well:9O07...	0.000611463	-0.100694	10.7451	8
Sm_intergen_2226	-&pSymB_ig_231 (261 bp, from 621625 to 621885) ( position: 100 to 149 )&Oligo status:all filters passed&-&Well:12B20...	0.00381447	-0.100863	11.5566	8
Sm_intergen_3615	-&S._meliloti_chromosome_ig_1083_rc (303 bp, from 2327922 to 2327620) ( position: 100 to 149 )&Oligo status:uniqueness filter failed for at least one oligo in intergenic region&-&Well:18I23...	0.0342724	-0.101364	8.2843	8
SMa1867	-&Putative AsnC (lrp)-family transcriptional activator&Oligo status:all filters passed&-&Well:5K10...	0.0500989	-0.101451	10.3476	8
Sm_intergen_6476	-&S._meliloti_chromosome_ig_469_rc (271 bp, from 1048884 to 1048614) ( position: 93 to 142 )&Oligo status:all filters passed&-&Well:31F10...	0.0318106	-0.103425	8.21866	8
Sm_intergen_3134	-&pSymB_ig_554 (236 bp, from 1528990 to 1529225) ( position: 103 to 152 )&Oligo status:all filters passed&-&Well:16N4...	0.0165694	-0.10418	9.88503	8
SMb20828	-&putative protein&Oligo status:all filters passed&-&Well:9L23...	0.0475626	-0.104341	8.90664	8
SMc01412	-&CONSERVED HYPOTHETICAL PROTEIN&Oligo status:all filters passed&-&Well:23N01...	0.00510397	-0.104668	10.6309	8
Sm_intergen_2075	-&pSymB_ig_195_rc (1109 bp, from 564786 to 563678) ( position: 113 to 162 )&Oligo status:all filters passed&-&Well:12K10...	0.0330815	-0.104891	8.54378	8
SMc02730	-&CONSERVED HYPOTHETICAL PROTEIN&Oligo status:all filters passed&-&Well:30N04...	0.0335798	-0.105628	8.36244	8
SMb21590	-&putative sugar uptake ABC transporter permease protein&Oligo status:all filters passed&-&Well:14B19...	0.0030014	-0.106723	8.62681	8
SMc00767	-&HYPOTHETICAL PROTEIN&Oligo status:all filters passed&-&Well:20F08...	0.048348	-0.107701	10.5667	8
SMa0495	-&putative ABC transporter, periplasmic solute-binding protein&Oligo status:all filters passed&-&Well:1J12...	0.0328806	-0.107731	10.0975	8
Sm_intergen_690	-&pSymA_ig_298_rc (297 bp, from 619852 to 619556) ( position: 147 to 196 )&Oligo status:all filters passed&-&Well:4B20...	0.0231911	-0.109451	11.9062	8
Sm_intergen_3086	-&pSymB_ig_533 (171 bp, from 1484252 to 1484422) ( position: 120 to 169 )&Oligo status:all filters passed&-&Well:16N1...	0.0343208	-0.109551	9.60589	8
SMc02784	-&HYPOTHETICAL PROTEIN&Oligo status:all filters passed&-&Well:30D11...	0.0484382	-0.110171	9.42048	8
Sm_intergen_1667	-&pSymA_ig_591_rc (534 bp, from 1344998 to 1344465) ( position: 110 to 159 )&Oligo status:all filters passed&-&Well:10C9...	0.0372263	-0.110349	12.2401	8
SMb21226	-&conserved hypothetical protein&Oligo status:all filters passed&-&Well:11J07...	0.0126718	-0.110962	8.31145	8
SMc02857	dnaK&HEAT SHOCK PROTEIN 70 (HSP70) CHAPERONE&Oligo status:all filters passed&-&Well:30N11...	6.27691e-08	-0.111091	11.5327	136
SMb21238	-&putative N-terminus of a pectate lyase, probably truncated due to chromosomal poin mutation or sequencing artefact protein&Oligo status:all filters passed&-&Well:11L03...	0.0383551	-0.111629	8.78998	8
SMc00321	truB&PROBABLE TRNA PSEUDOURIDINE SYNTHASE B PROTEIN&Oligo status:all filters passed&-&Well:17H08...	0.0205119	-0.112387	9.28353	8
Sm_intergen_6716	-&S._meliloti_chromosome_ig_553_rc (606 bp, from 1222911 to 1222306) ( position: 112 to 161 )&Oligo status:uniqueness filter failed for at least one oligo in intergenic region&-&Well:33F1...	0.0311171	-0.112601	9.90458	8
Sm_intergen_2790	-&pSymB_ig_425_rc (473 bp, from 1222916 to 1222444) ( position: 103 to 152 )&Oligo status:uniqueness filter failed for at least one oligo in intergenic region&-&Well:15F7...	0.0078317	-0.112787	10.1409	8
Sm_intergen_4992	-&S._meliloti_chromosome_ig_1527_rc (207 bp, from 3308114 to 3307908) ( position: 60 to 109 )&Oligo status:uniqueness filter failed for at least one oligo in intergenic region&-&Well:24J13...	0.0285496	-0.113048	10.9315	8
Sm_intergen_2620	-&pSymB_ig_359 (156 bp, from 1018332 to 1018487) ( position: 57 to 106 )&Oligo status:all filters passed&-&Well:13L20...	0.024603	-0.113119	9.95326	8
Sm_intergen_3102	-&pSymB_ig_540 (153 bp, from 1498549 to 1498701) ( position: 1 to 50 )&Oligo status:all filters passed&-&Well:16N2...	0.0282005	-0.11319	8.69971	8
SMc02777	-&PUTATIVE TRANSCRIPTION REGULATOR PROTEIN&Oligo status:all filters passed&-&Well:30B23...	0.0109718	-0.114563	12.0976	8
Sm_intergen_4738	-&S._meliloti_chromosome_ig_1471_rc (386 bp, from 3170213 to 3169828) ( position: 314 to 363 )&Oligo status:uniqueness filter failed for at least one oligo in intergenic region&-&Well:22L21...	0.0370812	-0.115093	12.6549	8
SMb21152	-&putative sugar uptake ABC transporter ATP-binding protein&Oligo status:all filters passed&-&Well:11N10...	0.00112678	-0.115792	9.85668	8
SMc01156	aarF&PROBABLE UBIQUINONE BIOSYNTHESIS PROTEIN&Oligo status:all filters passed&-&Well:23K06...	0.00365529	-0.115968	8.85349	8
SMc02736	tdk&PROBABLE THYMIDINE KINASE PROTEIN&Oligo status:all filters passed&-&Well:30N14...	0.0291342	-0.116831	8.18269	8
Sm_intergen_1127	-&pSymA_ig_442 (124 bp, from 996512 to 996635) ( position: 11 to 60 )&Oligo status:all filters passed&-&Well:6G23...	0.0331687	-0.117024	10.6346	8
SMc01129	lspA&PROBABLE LIPOPROTEIN SIGNAL PEPTIDASE TRANSMEMBRANE&Oligo status:all filters passed&-&Well:23E24...	0.00807708	-0.117696	8.90595	8
Sm_intergen_6315	-&S._meliloti_chromosome_ig_407_rc (392 bp, from 919580 to 919189) ( position: 100 to 149 )&Oligo status:uniqueness filter failed for at least one oligo in intergenic region&-&Well:29E24...	0.00947894	-0.117831	9.80663	8
SMc00454	-&HYPOTHETICAL PROTEIN&Oligo status:all filters passed&-&Well:17J09...	0.00486637	-0.118042	8.55046	8
Sm_intergen_1965	-&pSymB_ig_17_rc (157 bp, from 56556 to 56400) ( position: 16 to 65 )&Oligo status:all filters passed&-&Well:12M3...	0.0486281	-0.12041	8.70376	8
SMb20760	phnH&putative C-P (carbon-phosphorus) lyase component protein&Oligo status:all filters passed&-&Well:9F05...	0.0453854	-0.12051	8.03451	8
Sm_intergen_6407	-&S._meliloti_chromosome_ig_443 (196 bp, from 997367 to 997562) ( position: 71 to 120 )&Oligo status:all filters passed&-&Well:31A6...	0.020053	-0.120789	10.1717	8
SMa1176	-&Hypothetical protein&Oligo status:all filters passed&-&Well:3O18...	0.00207958	-0.120911	8.73185	8
SMc01651	-&PUTATIVE TRANSCRIPTION REGULATOR PROTEIN&Oligo status:all filters passed&-&Well:26M18...	0.0403526	-0.121331	10.6976	8
SMb21661	TRmNone1a&putative transposase of insertion sequence ISRm10-1, orfA protein&Oligo status:all filters passed&-&Well:14J07...	0.0446774	-0.122022	9.69121	8
SMc01944	-&PUTATIVE HALOPEROXIDASE PROTEIN&Oligo status:all filters passed&-&Well:28C13...	0.041468	-0.122643	8.50377	8
SMb21637	paaD&putative phenylacetic acid degradation protein&Oligo status:all filters passed&-&Well:14F17...	0.0115114	-0.122793	11.5416	8
SMa0367	-&hypothetical protein&Oligo status:all filters passed&-&Well:1O22...	0.0314563	-0.123557	9.4604	8
Sm_intergen_3589	-&S._meliloti_chromosome_ig_1077 (163 bp, from 2319095 to 2319257) ( position: 21 to 70 )&Oligo status:all filters passed&-&Well:18O21...	0.0482158	-0.125531	8.38924	8
Sm_intergen_1703	-&pSymA_ig_7 (296 bp, from 18914 to 19209) ( position: 100 to 149 )&Oligo status:all filters passed&-&Well:10G11...	0.0204682	-0.125807	10.7394	8
Sm_intergen_1742	-&pSymA_ig_85 (430 bp, from 192843 to 193272) ( position: 350 to 399 )&Oligo status:all filters passed&-&Well:10N13...	0.0411174	-0.126439	8.5525	8
SMc04201	-&PUTATIVE SIGNAL PEPTIDE PROTEIN&Oligo status:all filters passed&-&Well:34N12...	0.0311871	-0.126572	8.13488	8
SMb20554	-&HYPOTHETICAL PROTEIN&Oligo status:all filters passed&-&Well:9I08...	0.0178729	-0.1268	9.10208	8
Sm_intergen_4024	-&S._meliloti_chromosome_ig_1237_rc (400 bp, from 2642750 to 2642351) ( position: 240 to 289 )&Oligo status:uniqueness filter failed for at least one oligo in intergenic region&-&Well:21B1...	0.0226715	-0.128639	8.76506	8
SMc00406	-&HYPOTHETICAL 4FE-4S FERREDOXINS, IRON-SULFUR BINDING REGION SIGNATURE PROTEIN&Oligo status:all filters passed&-&Well:17F01...	0.0213793	-0.129346	9.41946	8
Sm_intergen_4635	-&S._meliloti_chromosome_ig_1427_rc (115 bp, from 3070033 to 3069919) ( position: 0 to 49 )&Oligo status:all filters passed&-&Well:22E15...	0.0383583	-0.129822	11.7892	8
SMc00777	-&CONSERVED HYPOTHETICAL PROTEIN&Oligo status:all filters passed&-&Well:20H04...	0.0238337	-0.130015	12.8253	8
SMc00676	-&PUTATIVE AMINO ACID-BINDING PERIPLASMIC SIGNAL PEPTIDE PROTEIN&Oligo status:all filters passed&-&Well:20I12...	0.0299425	-0.130445	12.3889	8
SMa0013	-&hypothetical protein&Oligo status:all filters passed&-&Well:1A13...	0.0482803	-0.131178	9.67028	8
SMa0308	-&conserved hypothetical protein&Oligo status:all filters passed&-&Well:1K10...	0.0263403	-0.132423	10.5021	8
SMa1250	nirK&putative NirK Cu-nitrite reductase&Oligo status:all filters passed&-&Well:3F18...	0.00275388	-0.132772	10.7006	8
SMc00944	-&CONSERVED HYPOTHETICAL PROTEIN&Oligo status:all filters passed&-&Well:20N13...	0.00841322	-0.133013	9.99355	8
SMc01264	-&HYPOTHETICAL TRANSMEMBRANE PROTEIN&Oligo status:all filters passed&-&Well:23J16...	0.0461567	-0.135471	8.71926	8
SMc00813	-&PUTATIVE TRANSPORT TRANSMEMBRANE PROTEIN&Oligo status:all filters passed&-&Well:20L24...	0.00408185	-0.136058	8.89837	8
Sm_intergen_6376	-&S._meliloti_chromosome_ig_430 (285 bp, from 963337 to 963621) ( position: 131 to 180 )&Oligo status:all filters passed&-&Well:31B4...	0.021035	-0.136086	9.18626	8
SMc00484	-&HYPOTHETICAL PROTEIN&Oligo status:all filters passed&-&Well:17N17...	0.0404919	-0.136133	10.8913	8
Sm_intergen_6704	-&S._meliloti_chromosome_ig_55 (166 bp, from 159878 to 160043) ( position: 22 to 71 )&Oligo status:uniqueness filter failed for at least one oligo in intergenic region&-&Well:31J24...	0.0215236	-0.136606	8.46056	8
SMa1243	azu1&Azu1 pseudoazurin (blue copper protein)&Oligo status:all filters passed&-&Well:3F12...	0.0208395	-0.13707	9.40282	8
SMa0218	-&putative ABC transporter, periplasmic solute-binding protein&Oligo status:all filters passed&-&Well:1C06...	0.00281308	-0.137401	9.46219	8
SMb21450	-&conserved hypothetical protein&Oligo status:all filters passed&-&Well:14K18...	0.0485837	-0.137737	10.3961	8
SMc00299	radC&PROBABLE DNA REPAIR PROTEIN&Oligo status:all filters passed&-&Well:17F18...	0.0208327	-0.138017	8.54553	8
SMa1585	-&hypothetical protein&Oligo status:all filters passed&-&Well:5C09...	0.00152807	-0.138382	8.44416	8
SMc00383	gst3&PUTATIVE GLUTATHIONE S-TRANSFERASE PROTEIN&Oligo status:all filters passed&-&Well:17B07...	0.000717636	-0.138766	11.74	8
Sm_intergen_5944	-&S._meliloti_chromosome_ig_312_rc (708 bp, from 702172 to 701465) ( position: 417 to 466 )&Oligo status:all filters passed&-&Well:29B1...	0.0409039	-0.139619	9.80772	8
SMc00086	cycG&PUTATIVE DIHEME CYTOCHROME C-TYPE SIGNAL PEPTIDE PROTEIN&Oligo status:all filters passed&-&Well:17I21...	0.0504877	-0.140228	10.9295	8
SMa1334	-&conserved hypothetical protein&Oligo status:all filters passed&-&Well:3N18...	0.0214707	-0.140908	9.40637	8
Sm_intergen_1691	-&pSymA_ig_64_rc (122 bp, from 154841 to 154720) ( position: 29 to 78 )&Oligo status:all filters passed&-&Well:10K10...	0.00417115	-0.141219	9.1952	8
Sm_intergen_4025	-&S._meliloti_chromosome_ig_1237_rc (400 bp, from 2642750 to 2642351) ( position: 340 to 389 )&Oligo status:uniqueness filter failed for at least one oligo in intergenic region&-&Well:21C1...	0.0368922	-0.14142	8.14821	8
SMb21437	-&putative C4-dicarboxylate transport system, permease small protein TRANSMEMBRANE&Oligo status:all filters passed&-&Well:14I16...	0.0297214	-0.141438	10.0864	8
SMb21539	-&putative aldehyde dehydrogenase protein&Oligo status:all filters passed&-&Well:14J16...	0.00507844	-0.141698	8.74004	8
Sm_intergen_6221	-&S._meliloti_chromosome_ig_368_rc (1659 bp, from 830836 to 829178) ( position: 788 to 837 )&Oligo status:all filters passed&-&Well:29G18...	0.0249009	-0.142226	10.3919	8
Sm_intergen_5548	-&S._meliloti_chromosome_ig_17_rc (349 bp, from 32788 to 32440) ( position: 194 to 243 )&Oligo status:uniqueness filter failed for at least one oligo in intergenic region&-&Well:25F24...	0.0463899	-0.142516	8.39024	8
SMc03048	flgK&PUTATIVE FLAGELLAR HOOK-ASSOCIATED PROTEIN&Oligo status:all filters passed&-&Well:32A14...	0.0102194	-0.142525	9.03905	8
SMc00552	pssA&PUTATIVE CDP-DIACYLGLYCEROL--SERINE O-PHOSPHATIDYLTRANSFERASE TRANSMEMBRANE PROTEIN&Oligo status:all filters passed&-&Well:20G17...	0.0334582	-0.143229	9.42554	8
Sm_intergen_3044	-&pSymB_ig_52 (154 bp, from 138853 to 139006) ( position: 47 to 96 )&Oligo status:all filters passed&-&Well:15D23...	0.00496344	-0.143296	9.44803	8
Sm_intergen_3032	-&pSymB_ig_515 (255 bp, from 1440136 to 1440390) ( position: 100 to 149 )&Oligo status:uniqueness filter failed for at least one oligo in intergenic region&-&Well:15H22...	0.00264945	-0.143298	8.25877	8
SMa0661	-&hypothetical protein&Oligo status:all filters passed&-&Well:1F17...	0.0506682	-0.143498	11.0154	8
Sm_intergen_3823	-&S._meliloti_chromosome_ig_1157 (372 bp, from 2497055 to 2497426) ( position: 137 to 186 )&Oligo status:all filters passed&-&Well:19I12...	0.030678	-0.144202	8.36247	8
Sm_intergen_5874	-&S._meliloti_chromosome_ig_289_rc (663 bp, from 660004 to 659342) ( position: 174 to 223 )&Oligo status:all filters passed&-&Well:27L20...	0.0419155	-0.144202	10.1572	8
Sm_intergen_4940	-&S._meliloti_chromosome_ig_1505 (179 bp, from 3257984 to 3258162) ( position: 72 to 121 )&Oligo status:all filters passed&-&Well:24F10...	0.0233277	-0.144321	9.72276	8
Sm_intergen_5640	-&S._meliloti_chromosome_ig_206_rc (255 bp, from 459140 to 458886) ( position: 100 to 149 )&Oligo status:uniqueness filter failed for at least one oligo in intergenic region&-&Well:27B6...	0.0133412	-0.14444	8.72154	8
Sm_intergen_1631	-&pSymA_ig_586 (155 bp, from 1326858 to 1327012) ( position: 105 to 154 )&Oligo status:all filters passed&-&Well:10O6...	0.0409934	-0.144531	11.0211	8
SMa1480	-&Probable LysR-type activator&Oligo status:all filters passed&-&Well:3J19...	0.0381194	-0.144636	11.3147	8
SMb20302	-&CONSERVED HYPOTHETICAL PROTEIN&Oligo status:all filters passed&-&Well:36B12...	0.00202678	-0.145482	8.78355	8
SMa0864	nodI&NodI membrane transport protein&Oligo status:all filters passed&-&Well:3G09...	0.0210874	-0.145718	13.3503	8
SMb20137	-&CONSERVED HYPOTHETICAL PROTEIN&Oligo status:all filters passed&-&Well:7I18...	0.0415029	-0.146571	9.30793	8
Sm_intergen_4665	-&S._meliloti_chromosome_ig_1440_rc (107 bp, from 3098015 to 3097909) ( position: 2 to 51 )&Oligo status:all filters passed&-&Well:22C17...	0.0180724	-0.14706	9.84288	8
SMa0447	-&conserved hypothetical protein&Oligo status:all filters passed&-&Well:1F20...	0.0365983	-0.147502	12.6624	8
Sm_intergen_7845	-&S._meliloti_chromosome_ig_910 (143 bp, from 2010808 to 2010950) ( position: 43 to 92 )&Oligo status:all filters passed&-&Well:37O23...	0.00949827	-0.147877	8.65453	8
SMb20764	phnL&putative phosphonate uptake ABC transporter ATP-binding protein&Oligo status:all filters passed&-&Well:9F13...	0.0244603	-0.148694	10.7879	8
SMb20683	-&putative transcriptional regulator, LysR family protein&Oligo status:all filters passed&-&Well:9L10...	0.0419345	-0.148994	12.89	8
Sm_intergen_6765	-&S._meliloti_chromosome_ig_569_rc (1270 bp, from 1259399 to 1258130) ( position: 215 to 264 )&Oligo status:uniqueness filter failed for at least one oligo in intergenic region&-&Well:33G4...	0.035738	-0.14979	8.22007	8
Sm_intergen_5544	-&S._meliloti_chromosome_ig_169 (253 bp, from 388218 to 388470) ( position: 102 to 151 )&Oligo status:all filters passed&-&Well:25B24...	0.0349759	-0.150181	8.10199	8
SMc03047	flgE&FLAGELLAR HOOK PROTEIN&Oligo status:all filters passed&-&Well:32A12...	0.0181029	-0.150621	10.443	8
SMc03295	TRm1a&TRANSPOSASE FOR INSERTION SEQUENCE ELEMENT ISRM1&Oligo status:uniqueness filter failed&-&Well:38A10...	0.0154979	-0.152102	9.27151	8
SMa0663	-&hypothetical protein&Oligo status:all filters passed&-&Well:1F21...	0.0364091	-0.152355	9.37584	8
Sm_intergen_4436	-&S._meliloti_chromosome_ig_1353 (232 bp, from 2926630 to 2926861) ( position: 97 to 146 )&Oligo status:all filters passed&-&Well:22N2...	0.0258113	-0.15251	8.03187	8
SMb20552	-&HYPOTHETICAL PROTEIN&Oligo status:all filters passed&-&Well:9I04...	0.0270244	-0.152735	13.7618	8
Sm_intergen_5971	-&S._meliloti_chromosome_ig_316_rc (200 bp, from 721127 to 720928) ( position: 147 to 196 )&Oligo status:all filters passed&-&Well:29M2...	0.0507817	-0.153068	8.04697	8
Sm_intergen_4839	-&S._meliloti_chromosome_ig_1485_rc (6791 bp, from 3214897 to 3208107) ( position: 2144 to 2193 ), rRNA operon&Oligo status:uniqueness filter failed for at least one oligo in intergenic region&-&Well:24A4...	0.0115157	-0.153544	15.1081	8
Sm_intergen_1859	-&pSymB_ig_126_rc (167 bp, from 357571 to 357405) ( position: 88 to 137 )&Oligo status:all filters passed&-&Well:10C21...	0.0220547	-0.154257	10.7711	8
Sm_intergen_3388	-&S._meliloti_chromosome_ig_1001_rc (1991 bp, from 2181031 to 2179041) ( position: 0 to 49 )&Oligo status:all filters passed&-&Well:18F9...	0.0218927	-0.154329	9.06137	8
Sm_intergen_2146	-&pSymB_ig_208 (1048 bp, from 581325 to 582372) ( position: 117 to 166 )&Oligo status:all filters passed&-&Well:12B15...	0.00305124	-0.154416	10.132	8
Sm_intergen_1857	-&pSymB_ig_125_rc (188 bp, from 355568 to 355381) ( position: 59 to 108 )&Oligo status:all filters passed&-&Well:10A21...	0.0252639	-0.154518	8.40471	8
SMb20669	-&conserved hypothetical protein, possibly hydroxypyruvate isomerase&Oligo status:all filters passed&-&Well:9J06...	0.0340616	-0.154576	8.45845	8
Sm_intergen_4441	-&S._meliloti_chromosome_ig_1355_rc (132 bp, from 2930371 to 2930240) ( position: 81 to 130 )&Oligo status:all filters passed&-&Well:22C3...	0.0254946	-0.158229	9.45239	8
SMb21285	-&conserved hypothetical protein, transthyretin-like protein&Oligo status:all filters passed&-&Well:14C03...	0.000791816	-0.158827	10.8815	8
SMc02486	-&PUTATIVE OXIDOREDUCTASE PROTEIN&Oligo status:all filters passed&-&Well:30K21...	0.0391726	-0.159204	8.69068	8
SMa0929	traG&TraG conjugal transfer protein&Oligo status:all filters passed&-&Well:3K17...	0.041458	-0.160679	9.24267	8
SMa1887	-&Putative transcriptional regulator&Oligo status:all filters passed&-&Well:5M06...	0.0497938	-0.161729	8.98615	8
Sm_intergen_2474	-&pSymB_ig_297_rc (156 bp, from 805755 to 805600) ( position: 46 to 95 )&Oligo status:uniqueness filter failed for at least one oligo in intergenic region&-&Well:13J11...	0.0414139	-0.162393	8.65633	8
Sm_intergen_6803	-&S._meliloti_chromosome_ig_583_rc (207 bp, from 1296723 to 1296517) ( position: 6 to 55 )&Oligo status:all filters passed&-&Well:33M6...	0.00226367	-0.162896	9.72629	8
SMa0374	-&putative dioxygenase&Oligo status:all filters passed&-&Well:1B08...	0.0406028	-0.164169	10.348	8
SMa0171	-&hypothetical protein&Oligo status:all filters passed&-&Well:1O03...	0.0224211	-0.16437	9.96742	8
Sm_intergen_8053	-&S._meliloti_chromosome_ig_99 (224 bp, from 266918 to 267141) ( position: 92 to 141 )&Oligo status:all filters passed&-&Well:39O12...	0.0298938	-0.165091	8.91129	8
Sm_intergen_3165	-&pSymB_ig_565 (169 bp, from 1558475 to 1558643) ( position: 22 to 71 )&Oligo status:uniqueness filter failed for at least one oligo in intergenic region&-&Well:16M6...	0.0326931	-0.165396	8.54613	8
SMc00830	-&HYPOTHETICAL TRANSMEMBRANE PROTEIN&Oligo status:all filters passed&-&Well:20P10...	0.00957724	-0.166027	9.16971	8
Sm_intergen_1624	-&pSymA_ig_582_rc (202 bp, from 1319298 to 1319097) ( position: 88 to 137 )&Oligo status:all filters passed&-&Well:10H6...	0.0133974	-0.167933	13.7218	8
SMc00953	-&PUTATIVE TRANSCRIPTION REGULATOR PROTEIN&Oligo status:all filters passed&-&Well:20P07...	0.00628621	-0.16988	9.14126	8
Sm_intergen_4779	-&S._meliloti_chromosome_ig_1485 (6791 bp, from 3208107 to 3214897) ( position: 1104 to 1153 ), rRNA operon&Oligo status:uniqueness filter failed for at least one oligo in intergenic region&-&Well:22E24...	0.0344514	-0.170547	8.12909	8
SMc00088	-&HYPOTHETICAL/UNKNOWN TRANSMEMBRANE PROTEIN&Oligo status:all filters passed&-&Well:17K01...	0.00199531	-0.170642	9.67587	8
SMa0736	-&hypothetical protein&Oligo status:all filters passed&-&Well:1N03...	0.000816111	-0.170822	9.07201	8
SMc01906	hrm&HISTONE-LIKE PROTEIN&Oligo status:all filters passed&-&Well:26N19...	0.00748928	-0.172037	11.4308	8
Sm_intergen_5328	-&S._meliloti_chromosome_ig_160_rc (631 bp, from 370367 to 369737) ( position: 506 to 555 )&Oligo status:uniqueness filter failed for at least one oligo in intergenic region&-&Well:25J10...	0.016724	-0.172908	8.85679	8
Sm_intergen_856	-&pSymA_ig_361_rc (421 bp, from 796518 to 796098) ( position: 369 to 418 )&Oligo status:all filters passed&-&Well:6H6...	0.00572762	-0.173511	8.46053	8
SMa0620	-&hypothetical protein&Oligo status:all filters passed&-&Well:1D11...	0.0502815	-0.173642	9.03398	8
Sm_intergen_1269	-&pSymA_ig_481 (1051 bp, from 1086190 to 1087240) ( position: 101 to 150 )&Oligo status:all filters passed&-&Well:8E8...	0.0391597	-0.174182	9.28414	8
Sm_intergen_3059	-&pSymB_ig_523_rc (195 bp, from 1456574 to 1456380) ( position: 13 to 62 )&Oligo status:all filters passed&-&Well:15C24...	0.0264272	-0.174681	10.0924	8
SMb20897	-&HYPOTHETICAL PROTEIN&Oligo status:all filters passed&-&Well:11G01...	0.00396612	-0.174958	9.74198	8
SMb20377	-&putative translation initiation inhibitor protein&Oligo status:all filters passed&-&Well:7N19...	0.0106934	-0.174965	9.79177	8
Sm_intergen_527	-&pSymA_ig_243 (1009 bp, from 512080 to 513088) ( position: 526 to 575 )&Oligo status:all filters passed&-&Well:4O9...	0.00564676	-0.176572	8.63171	8
Sm_intergen_3553	-&S._meliloti_chromosome_ig_1064_rc (478 bp, from 2293220 to 2292743) ( position: 250 to 299 )&Oligo status:uniqueness filter failed for at least one oligo in intergenic region&-&Well:18K19...	0.0426522	-0.176915	8.67548	8
SMb21147	-&putative choline uptake ABC transporter permease protein&Oligo status:all filters passed&-&Well:11L24...	0.0392875	-0.177115	11.3529	8
SMc00191	-&HYPOTHETICAL PROTEIN&Oligo status:all filters passed&-&Well:17I18...	0.0486186	-0.177237	12.1851	8
SMb21040	-&putative oligopeptidemurein peptide ABC transporter ATP-binding protein&Oligo status:all filters passed&-&Well:11K22...	0.000596502	-0.177591	10.2023	8
Sm_intergen_1050	-&pSymA_ig_415_rc (445 bp, from 938282 to 937838) ( position: 352 to 401 )&Oligo status:all filters passed&-&Well:6J18...	0.0233346	-0.177756	10.035	8
Sm_intergen_6490	-&S._meliloti_chromosome_ig_475 (459 bp, from 1061457 to 1061915) ( position: 262 to 311 )&Oligo status:uniqueness filter failed for at least one oligo in intergenic region&-&Well:31D11...	0.0480316	-0.178892	8.59204	8
Sm_intergen_4192	-&S._meliloti_chromosome_ig_1293 (6914 bp, from 2805257 to 2812170) ( position: 383 to 432 ), rRNA operon&Oligo status:uniqueness filter failed for at least one oligo in intergenic region&-&Well:21J11...	0.0256909	-0.179192	8.29609	8
SMa0125	groES3&GroES3 chaperonin&Oligo status:all filters passed&-&Well:36D03...	0.0134249	-0.1807	11.4952	8
SMc02112	-&HYPOTHETICAL UNKNOWN PROTEIN&Oligo status:all filters passed&-&Well:28K10...	0.00842223	-0.18123	9.88401	8
SMb20613	dctD&C4-dicarboxylate transport transcriptional regulatory protein&Oligo status:all filters passed&-&Well:9B18...	0.000524961	-0.182328	10.1525	8
SMb20256	-&HYPOTHETICAL PROTEIN&Oligo status:all filters passed&-&Well:7L12...	0.0308656	-0.182407	9.71428	8
SMc01108	-&CONSERVED HYPOTHETICAL PROTEIN&Oligo status:all filters passed&-&Well:23C06...	0.0414783	-0.182439	11.7055	8
Sm_intergen_4601	-&S._meliloti_chromosome_ig_1416 (793 bp, from 3048267 to 3049059) ( position: 743 to 792 )&Oligo status:all filters passed&-&Well:22C13...	0.0268969	-0.182528	8.59488	8
Sm_intergen_3394	-&S._meliloti_chromosome_ig_1001_rc (1991 bp, from 2181031 to 2179041) ( position: 488 to 537 )&Oligo status:all filters passed&-&Well:18L9...	0.0223034	-0.182577	8.51508	8
Sm_intergen_6073	-&S._meliloti_chromosome_ig_35 (7090 bp, from 81030 to 88119) ( position: 3129 to 3178 ), rRNA operon&Oligo status:uniqueness filter failed for at least one oligo in intergenic region&-&Well:29C9...	0.0448751	-0.182888	15.3219	8
Sm_intergen_4540	-&S._meliloti_chromosome_ig_1395 (109 bp, from 3003234 to 3003342) ( position: 53 to 102 )&Oligo status:all filters passed&-&Well:22F9...	0.0103934	-0.183492	12.0216	8
SMa0827	nifD&NifD nitrogenase Fe-Mo alpha chain&Oligo status:all filters passed&-&Well:3C21...	0.0395076	-0.183551	10.0861	8
Sm_intergen_7031	-&S._meliloti_chromosome_ig_654 (662 bp, from 1456291 to 1456952) ( position: 150 to 199 )&Oligo status:all filters passed&-&Well:33A21...	0.0253741	-0.183613	10.4232	8
SMc00157	-&CONSERVED HYPOTHETICAL PROTEIN&Oligo status:all filters passed&-&Well:17E04...	0.0281677	-0.183674	10.1325	8
Sm_intergen_175	-&pSymA_ig_141 (249 bp, from 304880 to 305128) ( position: 194 to 243 )&Oligo status:all filters passed&-&Well:2O11...	0.0201726	-0.183686	8.75885	8
SMc00708	gloB&PUTATIVE HYDROXYACYLGLUTATHIONE HYDROLASE (GLYOXALASE II) (GLX II) PROTEIN&Oligo status:all filters passed&-&Well:20M24...	0.0172756	-0.183733	9.31239	8
SMc02492	-&HYPOTHETICAL TRANSMEMBRANE PROTEIN&Oligo status:all filters passed&-&Well:30M09...	0.000272374	-0.184035	10.2051	8
Sm_intergen_6791	-&S._meliloti_chromosome_ig_578_rc (247 bp, from 1276341 to 1276095) ( position: 63 to 112 )&Oligo status:all filters passed&-&Well:33A6...	0.012755	-0.184206	8.90586	8
SMb20497	lyx&putative L-xylulose kinase protein&Oligo status:all filters passed&-&Well:9A06...	0.0466203	-0.184566	8.79545	8
Sm_intergen_6124	-&S._meliloti_chromosome_ig_35_rc (7090 bp, from 88119 to 81030) ( position: 2710 to 2759 ), rRNA operon&Oligo status:uniqueness filter failed for at least one oligo in intergenic region&-&Well:29F12...	0.000561831	-0.185388	9.36767	8
SMb20577	pcaH&putative protocatechuate 3,4-dioxygenase beta chain protein&Oligo status:all filters passed&-&Well:9K18...	0.027033	-0.185894	9.6467	8
SMa1741	-&putative iron uptake ABC transporter, ATP-binding protein&Oligo status:all filters passed&-&Well:5A08...	0.0258215	-0.186408	11.0187	8
SMb20690	-&HYPOTHETICAL PROTEIN&Oligo status:all filters passed&-&Well:9L24...	0.0356681	-0.187183	9.13656	8
Sm_intergen_7800	-&S._meliloti_chromosome_ig_895_rc (832 bp, from 1972800 to 1971969) ( position: 497 to 546 )&Oligo status:uniqueness filter failed for at least one oligo in intergenic region&-&Well:37B21...	0.0331765	-0.18805	8.71059	8
SMc02870	-&PUTATIVE OXIDOREDUCTASE PROTEIN&Oligo status:all filters passed&-&Well:30P13...	0.00443784	-0.188892	15.1218	8
SMc03043	motC&CHEMOTAXIS PRECURSOR (MOTILITY PROTEIN C) TRANSMEMBRANE&Oligo status:all filters passed&-&Well:32A04...	0.00830128	-0.189722	8.99849	8
Sm_intergen_5563	-&S._meliloti_chromosome_ig_175 (927 bp, from 398404 to 399330) ( position: 85 to 134 )&Oligo status:all filters passed&-&Well:27E1...	0.0268959	-0.189874	8.10265	8
SMc00888	-&PUTATIVE CONTAINS A 2-COMPONENT RECEIVER DOMAIN PROTEIN&Oligo status:all filters passed&-&Well:20F21...	0.000357595	-0.190124	9.02116	8
SMa1985	-&Hypothetical protein&Oligo status:all filters passed&-&Well:5F08...	0.000247428	-0.190169	9.25393	8
SMb21566	groEL5&putative heat shock protein groEL&Oligo status:all filters passed&-&Well:14N18...	0.012376	-0.190615	11.2268	8
SMc00283	-&PUTATIVE TRANSCRIPTION REGULATOR PROTEIN&Oligo status:all filters passed&-&Well:38E13...	0.0328556	-0.191369	9.69558	8
SMc03024	flgF&FLAGELLAR BASAL-BODY ROD PROTEIN&Oligo status:all filters passed&-&Well:32M17...	8.02322e-05	-0.192565	8.70085	8
Sm_intergen_4845	-&S._meliloti_chromosome_ig_1485_rc (6791 bp, from 3214897 to 3208107) ( position: 2827 to 2876 ), rRNA operon&Oligo status:uniqueness filter failed for at least one oligo in intergenic region&-&Well:24G4...	0.046689	-0.193038	15.0949	8
Sm_intergen_3043	-&pSymB_ig_519_rc (298 bp, from 1448327 to 1448030) ( position: 137 to 186 )&Oligo status:all filters passed&-&Well:15C23...	0.0143513	-0.193772	8.17051	8
SMc00975	mcpU&PROBABLE CHEMORECEPTOR (METHYL-ACCEPTING CHEMOTAXIS) TRANSMEMBRANE PROTEIN&Oligo status:all filters passed&-&Well:23C01...	0.0263213	-0.194073	10.2685	8
SMc02582	-&CONSERVED HYPOTHETICAL PROTEIN&Oligo status:all filters passed&-&Well:30I12...	0.0317903	-0.194101	10.03	8
Sm_intergen_958	-&pSymA_ig_396_rc (123 bp, from 899769 to 899647) ( position: 3 to 52 )&Oligo status:uniqueness filter failed for at least one oligo in intergenic region&-&Well:6N12...	0.00483855	-0.194488	10.0049	8
SMb21143	merA2&putative FAD-dependent pyridine nucleotide-disulphide oxidoreductase, similar to mercuric reductases protein&Oligo status:all filters passed&-&Well:11L16...	0.00293503	-0.194968	9.65324	8
SMc02704	-&HYPOTHETICAL PROTEIN&Oligo status:all filters passed&-&Well:30J04...	0.00424161	-0.196715	9.18061	8
Sm_intergen_4193	-&S._meliloti_chromosome_ig_1293 (6914 bp, from 2805257 to 2812170) ( position: 3888 to 3937 ), rRNA operon&Oligo status:uniqueness filter failed for at least one oligo in intergenic region&-&Well:21K11...	0.0250898	-0.197204	8.7934	8
Sm_intergen_3815	-&S._meliloti_chromosome_ig_1154 (301 bp, from 2489885 to 2490185) ( position: 120 to 169 )&Oligo status:all filters passed&-&Well:19A12...	0.00464847	-0.197939	8.61876	8
SMc02791	aroE1&PROBABLE SHIKIMATE 5-DEHYDROGENASE PROTEIN&Oligo status:all filters passed&-&Well:30F01...	0.00301671	-0.199166	8.41869	8
Sm_intergen_4238	-&S._meliloti_chromosome_ig_1293_rc (6914 bp, from 2812170 to 2805257) ( position: 3075 to 3124 ), rRNA operon&Oligo status:uniqueness filter failed for at least one oligo in intergenic region&-&Well:21H14...	0.0181087	-0.199449	15.3384	8
Sm_intergen_2649	-&pSymB_ig_369_rc (105 bp, from 1047363 to 1047259) ( position: 0 to 49 )&Oligo status:all filters passed&-&Well:13I22...	0.000665721	-0.19956	9.20108	8
SMa1351	-&Conserved hypothetical protein&Oligo status:all filters passed&-&Well:3P12...	0.0399102	-0.200653	8.91049	8
SMc02122	fpr&PROBABLE FERREDOXIN--NADP REDUCTASE PROTEIN&Oligo status:all filters passed&-&Well:28M06...	0.00246755	-0.200994	9.68961	8
Sm_intergen_4408	-&S._meliloti_chromosome_ig_1343_rc (1234 bp, from 2917687 to 2916454) ( position: 273 to 322 )&Oligo status:all filters passed&-&Well:22B1...	0.00647391	-0.201833	9.13014	7
SMc00873	kup1&PROBABLE KUP SYSTEM POTASSIUM UPTAKE TRANSMEMBRANE PROTEIN&Oligo status:all filters passed&-&Well:20D17...	0.0391395	-0.202181	8.31869	8
SMc02794	hemE&PROBABLE UROPORPHYRINOGEN DECARBOXYLASE PROTEIN&Oligo status:all filters passed&-&Well:30F07...	0.00420644	-0.203034	9.51691	8
SMa0677	-&glutamate/aspartate transport protein, putative&Oligo status:all filters passed&-&Well:1H13...	0.00299845	-0.204003	8.87509	8
SMb20614	-&HYPOTHETICAL PROTEIN&Oligo status:all filters passed&-&Well:9B20...	0.031996	-0.20411	10.7419	8
Sm_intergen_4916	-&S._meliloti_chromosome_ig_1497 (266 bp, from 3243275 to 3243540) ( position: 101 to 150 )&Oligo status:uniqueness filter failed for at least one oligo in intergenic region&-&Well:24N8...	0.0106075	-0.204352	8.93125	8
Sm_intergen_5508	-&S._meliloti_chromosome_ig_1671 (175 bp, from 3620371 to 3620545) ( position: 33 to 82 )&Oligo status:all filters passed&-&Well:25N21...	0.0378767	-0.205245	9.06091	8
SMc01741	-&HYPOTHETICAL PROTEIN&Oligo status:all filters passed&-&Well:26H12...	0.00769787	-0.206258	11.8334	8
Sm_intergen_1497	-&pSymA_ig_543_rc (888 bp, from 1216795 to 1215908) ( position: 124 to 173 )&Oligo status:all filters passed&-&Well:8I22...	0.00115173	-0.206601	8.00755	8
SMc04009	-&CONSERVED HYPOTHETICAL PROTEIN&Oligo status:all filters passed&-&Well:34E20...	0.0252179	-0.207749	10.6464	8
SMc03044	motD&CHEMOTAXIS PROTEIN (MOTILITY PROTEIN D)&Oligo status:all filters passed&-&Well:32A06...	0.00326823	-0.207836	8.77972	8
SMc00912	groES1&10 KD CHAPERONIN A PROTEIN&Oligo status:uniqueness filter failed&-&Well:38G15...	0.0175035	-0.208011	13.3277	8
Sm_intergen_4241	-&S._meliloti_chromosome_ig_1293_rc (6914 bp, from 2812170 to 2805257) ( position: 3471 to 3520 ), rRNA operon&Oligo status:uniqueness filter failed for at least one oligo in intergenic region&-&Well:21K14...	0.00665317	-0.208075	15.2885	8
SMa2159	-&hypothetical protein&Oligo status:all filters passed&-&Well:5B19...	0.00507421	-0.208937	8.23392	8
SMb21298	-&conserved hypothetical protein, possibly exported&Oligo status:all filters passed&-&Well:14E05...	0.0357071	-0.209117	11.2419	8
SMb21490	-&putative SUR1-like protein, similar to Bradyrhizobium japonicum shb1 gene&Oligo status:all filters passed&-&Well:14B20...	0.000405004	-0.209911	9.16388	8
Sm_intergen_4731	-&S._meliloti_chromosome_ig_147_rc (257 bp, from 352658 to 352402) ( position: 202 to 251 )&Oligo status:all filters passed&-&Well:22E21...	0.036631	-0.210015	9.87	8
Sm_intergen_1034	-&pSymA_ig_410_rc (247 bp, from 926871 to 926625) ( position: 121 to 170 )&Oligo status:all filters passed&-&Well:6J17...	0.000370692	-0.211058	10.3999	8
Sm_intergen_1041	-&pSymA_ig_413 (291 bp, from 933005 to 933295) ( position: 123 to 172 )&Oligo status:all filters passed&-&Well:6A18...	0.0389243	-0.211147	8.0265	8
SMb21048	-&hypothetical membrane protein&Oligo status:all filters passed&-&Well:11M12...	0.0375696	-0.211318	11.5911	8
Sm_intergen_7913	-&S._meliloti_chromosome_ig_939_rc (832 bp, from 2061342 to 2060511) ( position: 637 to 686 )&Oligo status:uniqueness filter failed for at least one oligo in intergenic region&-&Well:39C4...	0.0152524	-0.211402	9.28092	8
SMc00057	phaG2&PUTATIVE CATION EFFLUX SYSTEM PROTEIN&Oligo status:all filters passed&-&Well:17E19...	0.00919974	-0.212413	8.5282	8
SMc00092	cysH&PROBABLE PHOSPHOADENOSINE PHOSPHOSULFATE REDUCTASE PAPS REDUCTASE, THIOREDOXIN DEPENDENT PADOPS REDUCTASE 3'-PHOSPHOADENYLYLSULFATE SULFOTRANSFERASE CYSTEINE BIOSYNTHESIS PROTEIN&Oligo status:all filters passed&-&Well:17K09...	0.000269519	-0.213395	8.30217	8
Sm_intergen_241	-&pSymA_ig_160_rc (854 bp, from 345407 to 344554) ( position: 0 to 49 )&Oligo status:all filters passed&-&Well:2A16...	0.00626413	-0.213911	9.30277	8
SMc00427	prfC&PROBABLE PEPTIDE CHAIN RELEASE FACTOR RF-3 PROTEIN&Oligo status:all filters passed&-&Well:17H11...	0.0156179	-0.214597	11.982	8
SMa0745	groES2&groES2 chaperonin&Oligo status:uniqueness filter failed&-&Well:36F03...	0.0248703	-0.214615	13.027	8
Sm_intergen_4136	-&S._meliloti_chromosome_ig_1279_rc (243 bp, from 2743512 to 2743270) ( position: 77 to 126 )&Oligo status:all filters passed&-&Well:21B8...	0.00202245	-0.214706	10.5743	8
Sm_intergen_6862	-&S._meliloti_chromosome_ig_602_rc (1641 bp, from 1334356 to 1332716) ( position: 1582 to 1631 )&Oligo status:all filters passed&-&Well:33H10...	0.00196109	-0.216978	8.05964	8
SMb21631	nspC&putative carboxynorspermidine decarboxylase protein&Oligo status:all filters passed&-&Well:14F05...	0.00059961	-0.217167	9.84123	8
SMa0523	-&hypothetical protein&Oligo status:all filters passed&-&Well:1L20...	0.00141288	-0.217619	15.2577	8
Sm_intergen_6895	-&S._meliloti_chromosome_ig_613 (136 bp, from 1357718 to 1357853) ( position: 40 to 89 )&Oligo status:uniqueness filter failed for at least one oligo in intergenic region&-&Well:33I12...	0.000314171	-0.217955	8.75874	8
Sm_intergen_2142	-&pSymB_ig_207 (458 bp, from 580188 to 580645) ( position: 176 to 225 )&Oligo status:all filters passed&-&Well:12N14...	0.0267387	-0.218255	8.56464	8
Sm_intergen_7273	-&S._meliloti_chromosome_ig_729 (250 bp, from 1614086 to 1614335) ( position: 95 to 144 )&Oligo status:all filters passed&-&Well:35C12...	0.00127579	-0.220567	9.49813	8
SMb21438	-&putative C4-dicarboxylate transport system, C4-dicarboxylate-binding protein precursor SIGNAL PEPTIDE&Oligo status:all filters passed&-&Well:14I18...	0.0385456	-0.220569	12.2017	8
SMc00592	-&HYPOTHETICAL, TRANSMEMBRANE PROTEIN&Oligo status:all filters passed&-&Well:20M19...	0.00716577	-0.221146	9.64971	8
Sm_intergen_2455	-&pSymB_ig_290_rc (199 bp, from 783737 to 783539) ( position: 146 to 195 )&Oligo status:uniqueness filter failed for at least one oligo in intergenic region&-&Well:13G10...	0.00646711	-0.222253	8.78505	8
Sm_intergen_5497	-&S._meliloti_chromosome_ig_1667_rc (130 bp, from 3617029 to 3616900) ( position: 20 to 69 )&Oligo status:all filters passed&-&Well:25C21...	0.0148841	-0.223551	8.2389	8
SMc02845	-&PUTATIVE ANTIBIOTIC RESISTANCE PROTEIN&Oligo status:all filters passed&-&Well:30L11...	0.00199486	-0.223601	8.85165	8
Sm_intergen_5839	-&S._meliloti_chromosome_ig_275_rc (236 bp, from 618694 to 618459) ( position: 86 to 135 )&Oligo status:all filters passed&-&Well:27I18...	0.000367975	-0.22467	8.71891	8
Sm_intergen_7141	-&S._meliloti_chromosome_ig_687_rc (858 bp, from 1526319 to 1525462) ( position: 298 to 347 )&Oligo status:uniqueness filter failed for at least one oligo in intergenic region&-&Well:35O3...	6.05483e-05	-0.226706	9.36605	8
SMa2014	-&Putative transcriptional regulator&Oligo status:all filters passed&-&Well:5H14...	0.0058671	-0.226935	15.2416	8
Sm_intergen_7197	-&S._meliloti_chromosome_ig_704_rc (809 bp, from 1555529 to 1554721) ( position: 740 to 789 )&Oligo status:uniqueness filter failed for at least one oligo in intergenic region&-&Well:35G7...	0.00896392	-0.227526	15.2355	8
Sm_intergen_5191	-&S._meliloti_chromosome_ig_1573_rc (734 bp, from 3406047 to 3405314) ( position: 387 to 436 )&Oligo status:all filters passed&-&Well:25A2...	0.0110434	-0.228566	10.5581	8
Sm_intergen_5189	-&S._meliloti_chromosome_ig_1573 (734 bp, from 3405314 to 3406047) ( position: 550 to 599 )&Oligo status:all filters passed&-&Well:25O1...	0.00413419	-0.229604	8.24974	8
Sm_intergen_5955	-&S._meliloti_chromosome_ig_313_rc (1067 bp, from 711589 to 710523) ( position: 366 to 415 )&Oligo status:uniqueness filter failed for at least one oligo in intergenic region&-&Well:29M1...	0.00538508	-0.231251	9.23961	8
Sm_intergen_1153	-&pSymA_ig_451 (627 bp, from 1011839 to 1012465) ( position: 103 to 152 )&Oligo status:all filters passed&-&Well:8A1...	0.0108823	-0.234626	8.64665	8
Sm_intergen_6164	-&S._meliloti_chromosome_ig_350 (261 bp, from 802812 to 803072) ( position: 104 to 153 )&Oligo status:all filters passed&-&Well:29N14...	0.00392	-0.236641	8.10415	8
Sm_intergen_3950	-&S._meliloti_chromosome_ig_1206_rc (275 bp, from 2576060 to 2575786) ( position: 97 to 146 )&Oligo status:all filters passed&-&Well:19H20...	0.000505105	-0.237701	8.8916	8
Sm_intergen_6545	-&S._meliloti_chromosome_ig_496_rc (516 bp, from 1093568 to 1093053) ( position: 350 to 399 )&Oligo status:all filters passed&-&Well:31K14...	0.0212764	-0.240362	8.64326	8
SMc01471	senC&PUTATIVE CYTOCHROME C OXIDASE ASSEMBLY FACTOR TRANSMEMBRANE PROTEIN&Oligo status:all filters passed&-&Well:26E15...	0.0179795	-0.240476	9.10125	8
Sm_intergen_7396	-&S._meliloti_chromosome_ig_76 (276 bp, from 211689 to 211964) ( position: 111 to 160 )&Oligo status:all filters passed&-&Well:35N19...	0.0210922	-0.242818	10.2942	8
Sm_intergen_4027	-&S._meliloti_chromosome_ig_1238_rc (280 bp, from 2643670 to 2643391) ( position: 126 to 175 )&Oligo status:all filters passed&-&Well:21E1...	0.0412604	-0.244167	8.38839	8
SMc02254	qxtB&PUTATIVE QUINOL OXIDASE SUBUNIT II TRANSMEMBRANE PROTEIN&Oligo status:all filters passed&-&Well:28N04...	0.00373695	-0.244821	9.14658	8
SMc04327	-&CONSERVED HYPOTHETICAL PROTEIN&Oligo status:all filters passed&-&Well:36A17...	5.88282e-06	-0.245815	8.36385	8
Sm_intergen_6717	-&S._meliloti_chromosome_ig_553_rc (606 bp, from 1222911 to 1222306) ( position: 226 to 275 )&Oligo status:uniqueness filter failed for at least one oligo in intergenic region&-&Well:33G1...	0.00492814	-0.247216	9.27747	8
SMb20924	abfA&putative alpha-L-arabinofuranosidase protein&Oligo status:all filters passed&-&Well:11I19...	0.0420091	-0.24892	9.20989	8
Sm_intergen_3734	-&S._meliloti_chromosome_ig_1126_rc (196 bp, from 2433628 to 2433433) ( position: 66 to 115 )&Oligo status:uniqueness filter failed for at least one oligo in intergenic region&-&Well:19P6...	0.0248655	-0.250864	9.09378	8
SMc00141	-&HYPOTHETICAL PROTEIN&Oligo status:all filters passed&-&Well:17A20...	0.0218028	-0.253894	8.55953	8
Sm_intergen_3256	-&pSymB_ig_60 (512 bp, from 171738 to 172249) ( position: 357 to 406 )&Oligo status:uniqueness filter failed for at least one oligo in intergenic region&-&Well:18B1...	0.0067853	-0.255635	9.27772	8
SMc02584	actR&TRANSCRIPTION REGULATOR PROTEIN&Oligo status:all filters passed&-&Well:30I16...	4.74143e-05	-0.259316	10.4262	8
Sm_intergen_7382	-&S._meliloti_chromosome_ig_756_rc (155 bp, from 1681005 to 1680851) ( position: 38 to 87 )&Oligo status:all filters passed&-&Well:35P18...	0.00371004	-0.26088	10.6092	8
SMa0887	-&hypothetical protein&Oligo status:all filters passed&-&Well:3I09...	0.00872742	-0.262853	9.92135	8
Sm_intergen_7170	-&S._meliloti_chromosome_ig_697 (228 bp, from 1541537 to 1541764) ( position: 99 to 148 )&Oligo status:all filters passed&-&Well:35L5...	0.00633776	-0.265147	9.89444	8
SMc01365	rnr&PUTATIVE EXORIBONUCLEASE II PROTEIN&Oligo status:all filters passed&-&Well:23J11...	0.00698976	-0.26547	9.73241	8
SMa1943	-&Putative transcriptional regulator&Oligo status:all filters passed&-&Well:5B10...	0.0411948	-0.266964	10.2171	8
Sm_intergen_7285	-&S._meliloti_chromosome_ig_733 (222 bp, from 1626121 to 1626342) ( position: 72 to 121 )&Oligo status:all filters passed&-&Well:35O12...	0.041784	-0.267818	10.0399	8
SMc04164	-&HYPOTHETICAL PROTEIN&Oligo status:all filters passed&-&Well:36B05...	0.00404058	-0.268311	12.6624	8
SMb21146	-&putative choline uptake ABC transporter ATP-binding protein&Oligo status:all filters passed&-&Well:11L22...	4.90609e-05	-0.269762	9.12935	8
Sm_intergen_5000	-&S._meliloti_chromosome_ig_1530_rc (282 bp, from 3316359 to 3316078) ( position: 98 to 147 )&Oligo status:all filters passed&-&Well:24B14...	0.00108583	-0.271497	11.3066	8
SMa1495	-&putative serine-pyruvate transaminase&Oligo status:all filters passed&-&Well:3L11...	0.00538586	-0.275083	12.3987	8
SMc02940	-&HYPOTHETICAL PROTEIN&Oligo status:all filters passed&-&Well:32G05...	0.024477	-0.276889	11.0801	8
Sm_intergen_3540	-&S._meliloti_chromosome_ig_1060_rc (155 bp, from 2289072 to 2288918) ( position: 70 to 119 )&Oligo status:all filters passed&-&Well:18N18...	0.000105068	-0.278637	13.0985	8
SMa1978	-&Probable haloacid dehalogenase-like hydrolase&Oligo status:all filters passed&-&Well:5F04...	0.00129655	-0.281274	9.26526	8
SMc00198	-&HYPOTHETICAL/UNKNOWN PROTEIN&Oligo status:all filters passed&-&Well:36H08...	0.00820187	-0.281919	9.44043	8
SMc02483	sucB&PROBABLE DIHYDROLIPOAMIDE SUCCINYL TRANSFERASE COMPONENT OF 2-OXOGLUTARATE DEHYDROGENASE COMPLEX (E2) PROTEIN&Oligo status:all filters passed&-&Well:30K15...	0.0486015	-0.283092	9.41113	8
Sm_intergen_3627	-&S._meliloti_chromosome_ig_1087_rc (404 bp, from 2340828 to 2340425) ( position: 350 to 399 )&Oligo status:all filters passed&-&Well:18E24...	0.013902	-0.284647	13.4311	8
SMb21484	rpoE5&putative RNA polymerase sigma-E factor (sigma-24) protein&Oligo status:all filters passed&-&Well:14B08...	0.000849703	-0.28671	11.0026	8
Sm_intergen_7237	-&S._meliloti_chromosome_ig_713 (147 bp, from 1587252 to 1587398) ( position: 96 to 145 )&Oligo status:all filters passed&-&Well:35O9...	0.00159493	-0.286759	9.95095	8
SMc01548	-&CONSERVED HYPOTHETICAL PROTEIN&Oligo status:all filters passed&-&Well:26O05...	0.000192851	-0.289379	15.0963	8
SMc01834	-&CONSERVED HYPOTHETICAL PROTEIN&Oligo status:all filters passed&-&Well:26F13...	0.00191677	-0.290129	8.87123	8
SMc03900	ndvA&BETA-1-->2GLUCAN EXPORT ATP-BINDING PROTEIN&Oligo status:all filters passed&-&Well:34I19...	0.0168315	-0.290579	9.27516	8
SMa0355	-&putative LysR-type regulator&Oligo status:all filters passed&-&Well:1O10...	0.000386809	-0.291445	9.11558	8
SMa0744	groEL2&groEL2 chaperonin&Oligo status:uniqueness filter failed&-&Well:36F01...	0.0217774	-0.291728	12.2544	8
SMc02487	lpdA2&PROBABLE DIHYDROLIPOAMIDE DEHYDROGENASE (E3 COMPONENT OF 2-OXOGLUTARATE DEHYDROGENASE COMPLEX) TRANSMEMBRANE PROTEIN&Oligo status:all filters passed&-&Well:30K23...	0.00730916	-0.293829	11.3344	8
Sm_intergen_3158	-&pSymB_ig_562 (227 bp, from 1548753 to 1548979) ( position: 177 to 226 )&Oligo status:uniqueness filter failed for at least one oligo in intergenic region&-&Well:16F6...	0.0427163	-0.295151	9.60874	8
Sm_intergen_4079	-&S._meliloti_chromosome_ig_1256 (161 bp, from 2684242 to 2684402) ( position: 54 to 103 )&Oligo status:all filters passed&-&Well:21I4...	0.0203566	-0.296031	8.35608	8
Sm_intergen_8037	-&S._meliloti_chromosome_ig_983 (125 bp, from 2153900 to 2154024) ( position: 23 to 72 )&Oligo status:all filters passed&-&Well:39O11...	0.0404185	-0.296158	12.0149	8
Sm_intergen_4459	-&S._meliloti_chromosome_ig_1362_rc (101 bp, from 2944219 to 2944119) ( position: 15 to 64 )&Oligo status:all filters passed&-&Well:22E4...	0.00130645	-0.299414	9.34562	8
SMc01510	hmuV&PUTATIVE HEMIN TRANSPORT SYSTEM ATP-BINDING ABC TRANSPORTER PROTEIN&Oligo status:all filters passed&-&Well:26I13...	0.000905357	-0.301975	8.11787	8
Sm_intergen_5974	-&S._meliloti_chromosome_ig_318 (272 bp, from 731014 to 731285) ( position: 119 to 168 )&Oligo status:all filters passed&-&Well:29P2...	0.0213522	-0.308989	11.8562	8
SMc01136	-&HYPOTHETICAL TRANSMEMBRANE PROTEIN&Oligo status:all filters passed&-&Well:23G14...	0.0033307	-0.312206	11.2333	8
SMc03038	flaB&FLAGELLIN B PROTEIN&Oligo status:uniqueness filter failed&-&Well:38O11...	0.00671561	-0.312998	12.1632	8
Sm_intergen_3377	-&S._meliloti_chromosome_ig_1000_rc (206 bp, from 2178679 to 2178474) ( position: 59 to 108 )&Oligo status:uniqueness filter failed for at least one oligo in intergenic region&-&Well:18K8...	6.85322e-08	-0.316792	10.0474	8
Sm_intergen_1509	-&pSymA_ig_545_rc (1126 bp, from 1221480 to 1220355) ( position: 1060 to 1109 )&Oligo status:all filters passed&-&Well:8E23...	0.029669	-0.318262	9.56947	8
Sm_intergen_3463	-&S._meliloti_chromosome_ig_1028 (175 bp, from 2227274 to 2227448) ( position: 49 to 98 )&Oligo status:all filters passed&-&Well:18A14...	0.0228675	-0.319545	8.72394	7
SMc02498	atpH&PUTATIVE ATP SYNTHASE DELTA CHAIN PROTEIN&Oligo status:all filters passed&-&Well:30M21...	0.00147183	-0.321021	12.1595	8
SMa0969	-&putative response regulator of two-component system&Oligo status:all filters passed&-&Well:3O09...	0.00245923	-0.322685	13.7154	8
Sm_intergen_7404	-&S._meliloti_chromosome_ig_762_rc (654 bp, from 1699144 to 1698491) ( position: 190 to 239 )&Oligo status:all filters passed&-&Well:35F20...	0.00505336	-0.322904	10.2184	8
SMb21069	-&hypothetical membrane-anchored protein&Oligo status:all filters passed&-&Well:11B04...	0.0202904	-0.323837	10.597	8
Sm_intergen_3837	-&S._meliloti_chromosome_ig_1162_rc (370 bp, from 2501357 to 2500988) ( position: 285 to 334 )&Oligo status:uniqueness filter failed for at least one oligo in intergenic region&-&Well:19G13...	0.0279686	-0.324233	9.18597	8
Sm_intergen_530	-&pSymA_ig_243_rc (1009 bp, from 513088 to 512080) ( position: 243 to 292 )&Oligo status:all filters passed&-&Well:4B10...	0.0296726	-0.327021	10.1926	8
Sm_intergen_3638	-&S._meliloti_chromosome_ig_1090_rc (885 bp, from 2357250 to 2356366) ( position: 114 to 163 )&Oligo status:all filters passed&-&Well:18P24...	0.0137222	-0.327112	15.1486	8
Sm_intergen_1622	-&pSymA_ig_581_rc (170 bp, from 1315745 to 1315576) ( position: 85 to 134 )&Oligo status:all filters passed&-&Well:10F6...	9.24462e-06	-0.329628	8.68622	8
SMc03037	flaA&FLAGELLIN A PROTEIN&Oligo status:uniqueness filter failed&-&Well:38O09...	0.00904727	-0.330263	12.5923	8
SMc01242	-&SIGNAL PEPTIDE PROTEIN&Oligo status:all filters passed&-&Well:23H22...	0.011651	-0.330556	11.593	8
SMc02085	exbB&PROBABLE BIOPOLYMER TRANSPORT TRANSMEMBRANE PROTEIN&Oligo status:all filters passed&-&Well:28G04...	0.00466747	-0.330562	10.7876	8
Sm_intergen_2913	-&pSymB_ig_473_rc (1016 bp, from 1325890 to 1324875) ( position: 111 to 160 )&Oligo status:all filters passed&-&Well:15A15...	0.0414216	-0.330854	12.2122	8
Sm_intergen_2956	-&pSymB_ig_483_rc (128 bp, from 1361810 to 1361683) ( position: 12 to 61 )&Oligo status:all filters passed&-&Well:15L17...	0.0103788	-0.331222	9.04635	8
SMc02562	pckA&PHOSPHOENOLPYRUVATE CARBOXYKINASE PROTEIN&Oligo status:all filters passed&-&Well:30E20...	0.00719767	-0.336843	9.04104	8
Sm_intergen_2561	-&pSymB_ig_332_rc (117 bp, from 935353 to 935237) ( position: 28 to 77 )&Oligo status:all filters passed&-&Well:13A17...	0.00352372	-0.339822	8.34113	8
Sm_intergen_5945	-&S._meliloti_chromosome_ig_313 (1067 bp, from 710523 to 711589) ( position: 101 to 150 )&Oligo status:uniqueness filter failed for at least one oligo in intergenic region&-&Well:29C1...	0.00443527	-0.342674	9.22923	8
SMa0426	-&conserved hypothetical protein&Oligo status:all filters passed&-&Well:1F06...	0.00725914	-0.343695	8.86634	8
Sm_intergen_5193	-&S._meliloti_chromosome_ig_1574 (435 bp, from 3406367 to 3406801) ( position: 358 to 407 )&Oligo status:all filters passed&-&Well:25C2...	0.0332713	-0.353098	12.2446	8
SMc01740	lldD1&PUTATIVE L-LACTATE DEHYDROGENASE (CYTOCHROME) PROTEIN&Oligo status:all filters passed&-&Well:26H10...	0.00025404	-0.356316	10.3482	8
Sm_intergen_4994	-&S._meliloti_chromosome_ig_1528_rc (257 bp, from 3311706 to 3311450) ( position: 144 to 193 )&Oligo status:all filters passed&-&Well:24L13...	0.00238347	-0.357014	9.07943	8
SMc00460	-&CONSERVED HYPOTHETICAL PROTEIN&Oligo status:all filters passed&-&Well:17J21...	0.00462978	-0.357361	10.185	8
Sm_intergen_7357	-&S._meliloti_chromosome_ig_752 (876 bp, from 1674761 to 1675636) ( position: 500 to 549 )&Oligo status:all filters passed&-&Well:35G17...	0.00269624	-0.358841	9.88289	8
SMa2406	rhbD&RhbD Rhizobactin siderophore biosynthesis protein&Oligo status:all filters passed&-&Well:7C19...	0.00592552	-0.360127	10.4088	8
SMa0372	-&putative LysR-type regulator&Oligo status:all filters passed&-&Well:1B06...	0.0271917	-0.363954	8.89789	8
SMc01516	-&CONSERVED HYPOTHETICAL PROTEIN&Oligo status:all filters passed&-&Well:26K01...	3.65949e-05	-0.3701	11.4017	8
SMc01657	fhuA2&PUTATIVE FERRICHROME-IRON RECEPTOR PRECURSOR PROTEIN&Oligo status:all filters passed&-&Well:26O06...	0.0296294	-0.374785	12.6774	8
SMa1822	-&Hypothetical protein&Oligo status:all filters passed&-&Well:5G12...	0.00706861	-0.3756	9.352	8
Sm_intergen_5620	-&S._meliloti_chromosome_ig_199 (167 bp, from 447471 to 447637) ( position: 38 to 87 )&Oligo status:all filters passed&-&Well:27N4...	5.8088e-06	-0.378431	9.22237	8
Sm_intergen_4877	-&S._meliloti_chromosome_ig_1485_rc (6791 bp, from 3214897 to 3208107) ( position: 6347 to 6396 ), rRNA operon&Oligo status:uniqueness filter failed for at least one oligo in intergenic region&-&Well:24G6...	0.0098153	-0.380412	13.9768	8
SMb20684	-&conserved hypothetical protein&Oligo status:all filters passed&-&Well:9L12...	0.00950998	-0.382347	8.89716	8
Sm_intergen_4758	-&S._meliloti_chromosome_ig_1477_rc (127 bp, from 3186892 to 3186766) ( position: 27 to 76 )&Oligo status:all filters passed&-&Well:22P22...	0.00748503	-0.393186	9.75301	8
Sm_intergen_2553	-&pSymB_ig_33_rc (164 bp, from 82331 to 82168) ( position: 106 to 155 )&Oligo status:all filters passed&-&Well:13I16...	0.0164394	-0.399692	11.743	8
Sm_intergen_1681	-&pSymA_ig_60 (165 bp, from 141353 to 141517) ( position: 6 to 55 )&Oligo status:all filters passed&-&Well:10A10...	0.0338181	-0.401577	9.39874	8
Sm_intergen_120	-&pSymA_ig_128 (360 bp, from 280334 to 280693) ( position: 106 to 155 )&Oligo status:all filters passed&-&Well:2H8...	0.000550958	-0.402177	10.2383	8
Sm_intergen_4567	-&S._meliloti_chromosome_ig_1404_rc (304 bp, from 3022233 to 3021930) ( position: 100 to 149 )&Oligo status:all filters passed&-&Well:22A11...	0.00190814	-0.40392	8.73499	8
Sm_intergen_4023	-&S._meliloti_chromosome_ig_1237 (400 bp, from 2642351 to 2642750) ( position: 345 to 394 )&Oligo status:uniqueness filter failed for at least one oligo in intergenic region&-&Well:21A1...	0.00368944	-0.404586	10.9145	8
SMc03941	-&CONSERVED HYPOTHETICAL TRANSMEMBRANE PROTEIN&Oligo status:all filters passed&-&Well:34M09...	0.00577974	-0.408328	10.7488	8
Sm_intergen_659	-&pSymA_ig_29 (122 bp, from 69014 to 69135) ( position: 56 to 105 )&Oligo status:all filters passed&-&Well:4C18...	0.00174525	-0.418661	8.06531	8
Sm_intergen_2697	-&pSymB_ig_39_rc (199 bp, from 95472 to 95274) ( position: 43 to 92 )&Oligo status:all filters passed&-&Well:15I1...	0.0269184	-0.422653	8.05768	8
Sm_intergen_3996	-&S._meliloti_chromosome_ig_1225_rc (125 bp, from 2614694 to 2614570) ( position: 39 to 88 )&Oligo status:all filters passed&-&Well:19F23...	0.00555428	-0.44404	10.1994	8
SMa2404	rhbC&RhbC rhizobactin siderophore biosynthesis protein&Oligo status:all filters passed&-&Well:7C17...	0.00132478	-0.444552	10.4929	8
Sm_intergen_6102	-&S._meliloti_chromosome_ig_35 (7090 bp, from 81030 to 88119) ( position: 6528 to 6577 ), rRNA operon&Oligo status:uniqueness filter failed for at least one oligo in intergenic region&-&Well:29P10...	0.00243666	-0.451248	13.9582	8
SMb21488	cyoB&putative cytochrome o ubiquinol oxidase chain I protein&Oligo status:all filters passed&-&Well:14B16...	0.000690062	-0.452922	9.64471	8
SMc01842	-&PUTATIVE METHYLTRANSFERASE TRANSCRIPTION REGULATOR PROTEIN&Oligo status:all filters passed&-&Well:26F21...	5.0428e-07	-0.453198	8.65677	8
SMa0876	nolF&NolF secretion protein&Oligo status:all filters passed&-&Well:3I01...	0.00528717	-0.464813	10.5915	8
Sm_intergen_777	-&pSymA_ig_330 (249 bp, from 707877 to 708125) ( position: 99 to 148 )&Oligo status:all filters passed&-&Well:6I1...	0.0244907	-0.471452	10.0954	8
SMb21489	cyoC&putative cytochrome o ubiquinol oxidase chain III protein&Oligo status:all filters passed&-&Well:14B18...	0.000353505	-0.476877	10.8433	8
Sm_intergen_5002	-&S._meliloti_chromosome_ig_1531_rc (184 bp, from 3319643 to 3319460) ( position: 94 to 143 )&Oligo status:all filters passed&-&Well:24D14...	0.00987049	-0.483897	10.8339	8
SMc02047	gcvT&PROBABLE AMINOMETHYLTRANSFERASE (GLYCINE CLEAVAGE SYSTEM T PROTEIN)&Oligo status:all filters passed&-&Well:28A04...	0.00307996	-0.48518	8.37174	8
Sm_intergen_7359	-&S._meliloti_chromosome_ig_752 (876 bp, from 1674761 to 1675636) ( position: 761 to 810 )&Oligo status:all filters passed&-&Well:35I17...	0.00353769	-0.500126	10.7893	8
SMa0247	-&hypothetical protein&Oligo status:all filters passed&-&Well:1E12...	0.000699111	-0.525777	9.50655	8
SMa0779	-&conserved hypothetical protein with localized similarity&Oligo status:all filters passed&-&Well:1P17...	0.00601819	-0.535482	11.0793	8
SMc01512	hmuT&PUTATIVE HEMIN BINDING PERIPLASMIC TRANSMEMBRANE PROTEIN&Oligo status:all filters passed&-&Well:26I17...	0.00609856	-0.535978	9.2993	8
Sm_intergen_4491	-&S._meliloti_chromosome_ig_1376_rc (218 bp, from 2972336 to 2972119) ( position: 100 to 149 )&Oligo status:all filters passed&-&Well:22E6...	0.00649587	-0.544141	9.56622	8
Sm_intergen_7971	-&S._meliloti_chromosome_ig_96 (303 bp, from 259822 to 260124) ( position: 109 to 158 )&Oligo status:all filters passed&-&Well:39M7...	0.0207306	-0.546562	10.3677	8
Sm_intergen_3639	-&S._meliloti_chromosome_ig_1090_rc (885 bp, from 2357250 to 2356366) ( position: 375 to 424 )&Oligo status:all filters passed&-&Well:19A1...	0.000654615	-0.54856	13.6485	8
Sm_intergen_143	-&pSymA_ig_132 (1068 bp, from 288703 to 289770) ( position: 477 to 526 )&Oligo status:uniqueness filter failed for at least one oligo in intergenic region&-&Well:2O9...	0.0085672	-0.555917	9.06779	8
Sm_intergen_5527	-&S._meliloti_chromosome_ig_168_rc (311 bp, from 387088 to 386778) ( position: 188 to 237 )&Oligo status:all filters passed&-&Well:25A23...	0.00613891	-0.560423	10.1198	8
SMb20698	-&putative transport protein, similar to E. coli multidrug resistance protein EmrB&Oligo status:all filters passed&-&Well:9N12...	0.00553174	-0.563935	8.44955	8
Sm_intergen_7290	-&S._meliloti_chromosome_ig_734 (977 bp, from 1627760 to 1628736) ( position: 52 to 101 )&Oligo status:uniqueness filter failed for at least one oligo in intergenic region&-&Well:35D13...	3.64778e-05	-0.566613	9.42639	8
Sm_intergen_6952	-&S._meliloti_chromosome_ig_626_rc (712 bp, from 1398815 to 1398104) ( position: 426 to 475 )&Oligo status:all filters passed&-&Well:33B16...	0.0176546	-0.566907	12.8969	8
SMc01109	metK&PROBABLE S-ADENOSYLMETHIONINE SYNTHETASE PROTEIN&Oligo status:all filters passed&-&Well:23C08...	0.00685599	-0.570804	11.4252	8
SMb21431	-&hypothetical protein, possibly C terminus of iron ABC transporter periplasmatic solute-binding protein&Oligo status:all filters passed&-&Well:14I04...	6.30719e-05	-0.571779	11.7431	8
Sm_intergen_7751	-&S._meliloti_chromosome_ig_88_rc (119 bp, from 244292 to 244174) ( position: 67 to 116 )&Oligo status:all filters passed&-&Well:37A18...	0.000349079	-0.592558	9.24258	8
Sm_intergen_4965	-&S._meliloti_chromosome_ig_1516 (123 bp, from 3283807 to 3283929) ( position: 72 to 121 )&Oligo status:all filters passed&-&Well:24O11...	0.0184657	-0.59615	9.40052	8
SMc02514	-&PUTATIVE PERIPLASMIC BINDING ABC TRANSPORTER PROTEIN&Oligo status:all filters passed&-&Well:30A08...	0.00893197	-0.600551	10.5043	8
SMb20611	dctA&C4-dicarboxylate transport protein&Oligo status:all filters passed&-&Well:9B14...	0.0077943	-0.600906	9.03785	8
SMb21630	-&conserved hypothetical protein&Oligo status:all filters passed&-&Well:14F03...	2.44018e-05	-0.621355	10.8736	8
Sm_intergen_2530	-&pSymB_ig_32_rc (473 bp, from 81239 to 80767) ( position: 236 to 285 )&Oligo status:all filters passed&-&Well:13B15...	0.0166255	-0.638443	8.85624	8
SMb20127	-&HYPOTHETICAL PROTEIN&Oligo status:all filters passed&-&Well:7G22...	0.000276685	-0.638719	8.96621	8
SMc02482	sucA&PROBABLE 2-OXOGLUTARATE DEHYDROGENASE E1 COMPONENT PROTEIN&Oligo status:all filters passed&-&Well:30K13...	0.00153931	-0.64541	9.82047	8
Sm_intergen_4996	-&S._meliloti_chromosome_ig_1529_rc (124 bp, from 3313082 to 3312959) ( position: 63 to 112 )&Oligo status:all filters passed&-&Well:24N13...	0.000182501	-0.65115	11.4469	8
SMb21487	cyoA&putative cytochrome o ubiquinol oxidase chain II protein&Oligo status:all filters passed&-&Well:14B14...	4.54467e-06	-0.655385	10.8426	8
SMc02255	qxtA&PUTATIVE QUINOL OXIDASE SUBUNIT I TRANSMEMBRANE PROTEIN&Oligo status:all filters passed&-&Well:28N06...	0.00139383	-0.658085	8.59038	8
Sm_intergen_5625	-&S._meliloti_chromosome_ig_20_rc (158 bp, from 47837 to 47680) ( position: 108 to 157 )&Oligo status:all filters passed&-&Well:27C5...	1.66441e-07	-0.66454	10.7162	8
SMc01518	-&CONSERVED HYPOTHETICAL PROTEIN&Oligo status:all filters passed&-&Well:26K05...	0.0008709	-0.66652	9.80673	8
SMc02480	sucC&PROBABLE SUCCINYL-COA SYNTHETASE BETA CHAIN PROTEIN&Oligo status:all filters passed&-&Well:30K09...	0.00609916	-0.66696	10.5083	8
SMc02479	mdh&PROBABLE MALATE DEHYDROGENASE PROTEIN&Oligo status:all filters passed&-&Well:30K07...	0.00123181	-0.691109	11.444	8
SMc01747	-&HYPOTHETICAL PROTEIN&Oligo status:all filters passed&-&Well:36L12...	0.00148744	-0.720527	10.9538	8
SMc02755	ahcY&PROBABLE ADENOSYLHOMOCYSTEINASE PROTEIN&Oligo status:all filters passed&-&Well:30P04...	0.00716167	-0.755712	11.7291	8
SMa2339	-&putative siderophore biosynthesis protein&Oligo status:all filters passed&-&Well:5P05...	0.00635395	-0.762386	8.68586	8
SMa2412	rhrA&RhrA transcriptional activator&Oligo status:all filters passed&-&Well:7E01...	0.000743387	-0.783714	8.22196	8
SMc01658	-&PUTATIVE TRANSPORT PROTEIN&Oligo status:all filters passed&-&Well:26O08...	0.00119146	-0.795186	9.35977	8
SMa2402	rhbB&RhsB L-2,4-diaminobutyrate decarboxylase&Oligo status:all filters passed&-&Well:7C15...	3.04462e-05	-0.814333	9.73048	8
SMa2400	rhbA&RhbA diaminobutyrate-pyruvate aminotransferase&Oligo status:all filters passed&-&Well:7C13...	0.0211741	-0.815521	8.43141	8
Sm_intergen_3122	-&pSymB_ig_549 (209 bp, from 1515259 to 1515467) ( position: 90 to 139 )&Oligo status:all filters passed&-&Well:16B4...	0.0354702	-0.867949	9.82768	8
Sm_intergen_3012	-&pSymB_ig_506 (342 bp, from 1412127 to 1412468) ( position: 100 to 149 )&Oligo status:all filters passed&-&Well:15D21...	3.19617e-05	-0.870669	9.60059	8
SMc01517	-&CONSERVED HYPOTHETICAL PROTEIN&Oligo status:all filters passed&-&Well:26K03...	6.87671e-06	-0.919228	9.94548	8
SMa2414	rhtA&RhtA Rhizobactin receptor precursor&Oligo status:all filters passed&-&Well:7E03...	0.00381503	-0.940905	10.7979	8
SMc00433	iolE&PUTATIVE MYO-INOSITOL CATABOLISM PROTEIN&Oligo status:all filters passed&-&Well:17H23...	0.00110537	-0.943545	10.6702	8
Sm_intergen_2882	-&pSymB_ig_462 (252 bp, from 1306524 to 1306775) ( position: 99 to 148 )&Oligo status:all filters passed&-&Well:15B13...	0.000249059	-0.95816	9.81008	8
SMc00781	iolA&PUTATIVE MALONIC SEMIALDEHYDE OXIDATIVE DECARBOXYLASE PROTEIN&Oligo status:all filters passed&-&Well:20H12...	0.00546137	-0.985613	11.7508	8
SMc01659	-&PUTATIVE TRANSPORT TRANSMEMBRANE PROTEIN&Oligo status:all filters passed&-&Well:26O10...	6.94071e-05	-1.01501	8.369	8
Sm_intergen_5478	-&S._meliloti_chromosome_ig_166_rc (173 bp, from 381949 to 381777) ( position: 100 to 149 )&Oligo status:all filters passed&-&Well:25P19...	0.040009	-1.03716	11.4542	6
SMc00432	iolB&PUTATIVE MYO-INOSITOL CATABOLISM PROTEIN&Oligo status:all filters passed&-&Well:17H21...	0.0103891	-1.0574	10.9292	8
SMc01513	hmuS&PUTATIVE HEMIN TRANSPORT PROTEIN&Oligo status:all filters passed&-&Well:26I19...	0.000416321	-1.0751	9.57616	8
SMa2410	rhbF&RhbF Rhizobactin siderophore biosynthesis protein RhsF&Oligo status:all filters passed&-&Well:7C23...	0.0220047	-1.09137	8.97257	8
Sm_intergen_3952	-&S._meliloti_chromosome_ig_1207_rc (125 bp, from 2578415 to 2578291) ( position: 19 to 68 )&Oligo status:all filters passed&-&Well:19J20...	0.000562428	-1.0929	9.47924	8
SMc01514	-&CONSERVED HYPOTHETICAL PROTEIN&Oligo status:all filters passed&-&Well:26I21...	0.000424634	-1.1081	9.24446	8
SMc01163	-&PUTATIVE OXIDOREDUCTASE PROTEIN&Oligo status:all filters passed&-&Well:23K20...	0.0182821	-1.16232	10.6784	8
SMc01165	iolC&PUTATIVE SUGAR KINASE PROTEIN&Oligo status:all filters passed&-&Well:23K24...	0.00190332	-1.18881	9.18561	8
SMc01166	iolD&PUTATIVE MALONIC SEMIALDEHYDE OXIDATIVE DECARBOXYLASE PROTEIN&Oligo status:all filters passed&-&Well:23M02...	0.00535951	-1.19065	10.5339	8
SMb20713	-&putative sugar uptake ABC transporter ATP-binding protein&Oligo status:all filters passed&-&Well:9P18...	0.0330585	-1.19715	9.6867	8
SMa2408	rhbE&RhbE Rhizobactin siderophore biosynthesis protein&Oligo status:all filters passed&-&Well:7C21...	0.00783282	-1.33047	8.3024	8
Sm_intergen_6053	-&S._meliloti_chromosome_ig_349 (117 bp, from 801200 to 801316) ( position: 62 to 111 )&Oligo status:all filters passed&-&Well:29O7...	0.000339571	-1.46507	10.6837	8
Sm_intergen_5451	-&S._meliloti_chromosome_ig_165_rc (156 bp, from 380875 to 380720) ( position: 94 to 143 )&Oligo status:all filters passed&-&Well:25E18...	0.00353099	-1.50304	10.8335	8
SMb20072	-&putative rhizopine binding protein&Oligo status:all filters passed&-&Well:7O13...	0.0234973	-1.62367	10.7818	8
SMc02726	-&PUTATIVE IRON TRANSPORT PROTEIN&Oligo status:all filters passed&-&Well:30L20...	0.000570084	-1.86991	9.6999	8
Sm_intergen_5503	-&S._meliloti_chromosome_ig_167_rc (121 bp, from 385924 to 385804) ( position: 50 to 99 )&Oligo status:all filters passed&-&Well:25I21...	0.00128946	-1.92138	10.0727	8
