# Supplementary material for: ExoS/ChvI Two-Component Signal-Transduction System Activated in the Absence of Bacterial Phosphatidylcholine
Source: Frontiers journal article supplement (doi:10.3389/fpls.2021.678976), 2021-07-23
Supplement: Table_2.XLS [file Table_2.XLS]

## Sheet: 1021_vs_OG10017_complete
Reporter Name	Reporter Description	P value	M value	A value	COMPUTED
SMb21440	-&HYPOTHETICAL PROTEIN&Oligo status:all filters passed&-&Well:14I22...	5.91441e-06	2.51702	11.0157	8
Sm_intergen_5384	-&S._meliloti_chromosome_ig_1623 (330 bp, from 3509512 to 3509841) ( position: 125 to 174 )&Oligo status:all filters passed&-&Well:25B14...	1.87917e-06	2.45531	12.509	8
SMc01855	-&HYPOTHETICAL TRANSMEMBRANE PROTEIN&Oligo status:all filters passed&-&Well:26H23...	0.000115423	2.05947	9.8806	8
SMc02156	-&CONSERVED HYPOTHETICAL PROTEIN&Oligo status:all filters passed&-&Well:28B10...	7.90224e-05	2.00696	10.867	8
SMa1264	-&Conserved hypothetical protein&Oligo status:all filters passed&-&Well:3H12...	0.000467987	1.69734	8.57889	8
SMa0994	-&hypothetical protein&Oligo status:all filters passed&-&Well:3A06...	5.86111e-06	1.64838	9.97638	8
Sm_intergen_6836	-&S._meliloti_chromosome_ig_596_rc (415 bp, from 1321379 to 1320965) ( position: 362 to 411 )&Oligo status:all filters passed&-&Well:33N8...	9.46516e-05	1.63667	11.3867	8
Sm_intergen_7771	-&S._meliloti_chromosome_ig_887_rc (409 bp, from 1956916 to 1956508) ( position: 259 to 308 )&Oligo status:all filters passed&-&Well:37E19...	0.000265123	1.57568	8.53964	8
SMa1077	nex18&Nex18 Symbiotically induced conserved protein&Oligo status:all filters passed&-&Well:3G06...	0.000731568	1.57047	11.1594	8
Sm_intergen_7349	-&S._meliloti_chromosome_ig_750_rc (1740 bp, from 1668617 to 1666878) ( position: 1669 to 1718 )&Oligo status:uniqueness filter failed for at least one oligo in intergenic region&-&Well:35O16...	5.14513e-06	1.53477	11.4055	8
SMc00949	-&CONSERVED HYPOTHETICAL PROTEIN&Oligo status:all filters passed&-&Well:20N23...	8.78219e-05	1.53309	10.2121	8
SMb20204	pqqA&putative pyrroloquinoline quinone synthesis protein A&Oligo status:all filters passed&-&Well:36B06...	6.5202e-06	1.5178	10.0855	8
Sm_intergen_3434	-&S._meliloti_chromosome_ig_1016_rc (789 bp, from 2204782 to 2203994) ( position: 700 to 749 )&Oligo status:all filters passed&-&Well:18D12...	0.00252779	1.50943	8.41129	8
Sm_intergen_1644	-&pSymA_ig_587_rc (1840 bp, from 1329990 to 1328151) ( position: 1672 to 1721 )&Oligo status:uniqueness filter failed for at least one oligo in intergenic region&-&Well:10L7...	3.05018e-06	1.47092	11.9606	8
SMb20960	exoN&UDPglucose pyrophosphorylase protein&Oligo status:all filters passed&-&Well:36E02...	8.3663e-07	1.46359	9.65146	8
Sm_intergen_5753	-&S._meliloti_chromosome_ig_244_rc (2407 bp, from 545715 to 543309) ( position: 541 to 590 )&Oligo status:all filters passed&-&Well:27C13...	9.78936e-06	1.40132	9.55116	8
SMc03999	-&HYPOTHETICAL PROTEIN&Oligo status:all filters passed&-&Well:36P20...	2.57702e-06	1.38593	11.1707	8
SMb20902	-&putative sugar uptake ABC transporter periplasmic solute-binding protein precursor&Oligo status:all filters passed&-&Well:11G11...	0.000145305	1.37764	9.9962	8
Sm_intergen_6842	-&S._meliloti_chromosome_ig_599_rc (139 bp, from 1327935 to 1327797) ( position: 9 to 58 )&Oligo status:all filters passed&-&Well:33D9...	0.000235213	1.36336	8.49134	8
Sm_intergen_5306	-&S._meliloti_chromosome_ig_1594 (149 bp, from 3460433 to 3460581) ( position: 71 to 120 )&Oligo status:all filters passed&-&Well:25D9...	2.71073e-06	1.35625	9.22667	8
SMc02900	-&CONSERVED HYPOTHETICAL PROTEIN&Oligo status:all filters passed&-&Well:36P02...	3.58823e-06	1.35084	11.5261	8
Sm_intergen_7314	-&S._meliloti_chromosome_ig_740 (206 bp, from 1638966 to 1639171) ( position: 62 to 111 )&Oligo status:all filters passed&-&Well:35L14...	0.000304372	1.33923	8.9237	8
SMc02051	-&CONSERVED HYPOTHETICAL PROTEIN&Oligo status:all filters passed&-&Well:36L14...	1.92813e-06	1.31512	12.5496	8
Sm_intergen_3645	-&S._meliloti_chromosome_ig_1092_rc (200 bp, from 2359313 to 2359114) ( position: 50 to 99 )&Oligo status:all filters passed&-&Well:19G1...	1.56738e-07	1.29462	9.11242	8
Sm_intergen_3579	-&S._meliloti_chromosome_ig_1072_rc (763 bp, from 2313447 to 2312685) ( position: 492 to 541 )&Oligo status:all filters passed&-&Well:18E21...	2.08228e-05	1.27818	9.47165	8
SMc01465	creA&PUTATIVE CREA PROTEIN&Oligo status:all filters passed&-&Well:26E07...	1.81074e-05	1.27678	8.3724	8
SMc02052	-&CONSERVED HYPOTHETICAL PROTEIN&Oligo status:all filters passed&-&Well:36L16...	4.5681e-07	1.2662	11.6102	8
SMc01580	-&HYPOTHETICAL TRANSMEMBRANE PROTEIN&Oligo status:all filters passed&-&Well:26C12...	3.17932e-06	1.25244	8.68376	8
Sm_intergen_6485	-&S._meliloti_chromosome_ig_473 (110 bp, from 1057469 to 1057578) ( position: 8 to 57 )&Oligo status:uniqueness filter failed for at least one oligo in intergenic region&-&Well:31O10...	0.0159955	1.24077	8.09704	8
SMa1831	-&Hypothetical protein&Oligo status:all filters passed&-&Well:5G20...	0.00017517	1.2374	8.78646	8
Sm_intergen_1496	-&pSymA_ig_543 (888 bp, from 1215908 to 1216795) ( position: 714 to 763 )&Oligo status:all filters passed&-&Well:8H22...	0.000660243	1.22532	8.05321	8
nptII	nptII&neomycin phosphotransferase II&Oligo status:-&-&Well:38G02...	6.71335e-06	1.20408	9.66313	8
Sm_intergen_5850	-&S._meliloti_chromosome_ig_280 (550 bp, from 632644 to 633193) ( position: 152 to 201 )&Oligo status:all filters passed&-&Well:27D19...	2.99748e-07	1.1906	10.3077	8
Sm_intergen_4527	-&S._meliloti_chromosome_ig_1389_rc (155 bp, from 2996533 to 2996379) ( position: 81 to 130 )&Oligo status:all filters passed&-&Well:22I8...	8.5086e-06	1.18041	8.88234	8
Sm_intergen_3643	-&S._meliloti_chromosome_ig_1091_rc (139 bp, from 2358575 to 2358437) ( position: 0 to 49 )&Oligo status:all filters passed&-&Well:19E1...	5.29152e-09	1.14772	9.9774	8
SMb21295	-&putative small heat shock protein, hsp20 family&Oligo status:all filters passed&-&Well:14C23...	6.13425e-05	1.13982	9.58516	8
Sm_intergen_2763	-&pSymB_ig_414_rc (126 bp, from 1177910 to 1177785) ( position: 29 to 78 )&Oligo status:all filters passed&-&Well:15K5...	8.74173e-07	1.13138	10.0811	8
Sm_intergen_5851	-&S._meliloti_chromosome_ig_280 (550 bp, from 632644 to 633193) ( position: 399 to 448 )&Oligo status:all filters passed&-&Well:27E19...	1.70089e-07	1.11464	10.1585	8
SMc02266	-&CONSERVED HYPOTHETICAL PROTEIN&Oligo status:all filters passed&-&Well:28P04...	0.000359727	1.10881	10.2182	8
SMb20946	exoY&galactosyltransferase protein&Oligo status:all filters passed&-&Well:11M15...	3.96975e-05	1.05898	11.8177	8
SMb21337	-&putative iron-sulfur-binding protein, probably subunit of an oxidoreductase like aldehyde oxidase or xanthine dehydrogenase&Oligo status:all filters passed&-&Well:14K05...	4.64034e-05	1.03197	11.9977	8
Sm_intergen_6701	-&S._meliloti_chromosome_ig_548_rc (416 bp, from 1209209 to 1208794) ( position: 364 to 413 )&Oligo status:all filters passed&-&Well:31G24...	1.97991e-05	1.03108	9.85491	8
Sm_intergen_4235	-&S._meliloti_chromosome_ig_1293_rc (6914 bp, from 2812170 to 2805257) ( position: 281 to 330 ), rRNA operon&Oligo status:uniqueness filter failed for at least one oligo in intergenic region&-&Well:21E14...	4.40173e-05	1.02003	9.98472	8
Sm_intergen_5420	-&S._meliloti_chromosome_ig_1638 (676 bp, from 3545026 to 3545701) ( position: 135 to 184 )&Oligo status:all filters passed&-&Well:25F16...	0.00917804	0.975787	8.13278	8
SMc00591	-&HYPOTHETICAL/UNKNOWN SIGNAL PEPTIDE PROTEIN&Oligo status:all filters passed&-&Well:20M17...	0.00572882	0.961379	9.81133	7
SMc03780	-&HYPOTHETICAL PROTEIN&Oligo status:all filters passed&-&Well:32H05...	0.000914487	0.936324	10.9115	8
Sm_intergen_3578	-&S._meliloti_chromosome_ig_1072_rc (763 bp, from 2313447 to 2312685) ( position: 203 to 252 )&Oligo status:all filters passed&-&Well:18D21...	0.000234232	0.935044	10.6175	8
Sm_intergen_4683	-&S._meliloti_chromosome_ig_1448_rc (119 bp, from 3110327 to 3110209) ( position: 38 to 87 )&Oligo status:all filters passed&-&Well:22E18...	8.00537e-08	0.930315	8.62624	8
SMc02403	-&PUTATIVE MUREIN TRANSGLYCOSYLASE PROTEIN&Oligo status:all filters passed&-&Well:28P23...	0.0508423	0.927049	8.04527	7
Sm_intergen_5686	-&S._meliloti_chromosome_ig_224 (664 bp, from 501773 to 502436) ( position: 399 to 448 )&Oligo status:all filters passed&-&Well:27P8...	0.00225593	0.896184	11.4425	8
SMa1587	eglC&EglC ENDO-1,3-1,4-BETA-GLYCANASE&Oligo status:all filters passed&-&Well:5C13...	0.00236884	0.895015	9.21044	8
SMc01341	-&HYPOTHETICAL/UNKNOWN PROTEIN&Oligo status:all filters passed&-&Well:36J16...	0.000958327	0.868984	9.72068	8
SMc00062	-&HYPOTHETICAL PROTEIN&Oligo status:all filters passed&-&Well:17G05...	0.00482006	0.856	9.12686	8
Sm_intergen_4744	-&S._meliloti_chromosome_ig_1474 (1086 bp, from 3177458 to 3178543) ( position: 277 to 326 )&Oligo status:all filters passed&-&Well:22B22...	7.73369e-08	0.84288	9.52835	8
Sm_intergen_2965	-&pSymB_ig_488 (553 bp, from 1370493 to 1371045) ( position: 204 to 253 )&Oligo status:all filters passed&-&Well:15E18...	3.48796e-05	0.841181	8.45189	8
SMc01788	-&HYPOTHETICAL PROTEIN&Oligo status:all filters passed&-&Well:26N20...	3.7233e-06	0.83548	10.5733	8
SMc02390	gst7&PUTATIVE GLUTATHIONE S-TRANSFERASE PROTEIN&Oligo status:all filters passed&-&Well:28P07...	0.000107894	0.826199	10.4388	8
SMc00094	betB&BETAINE ALDEHYDE DEHYDROGENASE BADH OXIDOREDUCTASE NAD PROTEIN&Oligo status:all filters passed&-&Well:17K13...	0.000328173	0.825668	9.43258	8
Sm_intergen_7184	-&S._meliloti_chromosome_ig_702 (154 bp, from 1551427 to 1551580) ( position: 90 to 139 )&Oligo status:all filters passed&-&Well:35J6...	0.000962076	0.812417	8.47989	8
Sm_intergen_2992	-&pSymB_ig_498_rc (259 bp, from 1395370 to 1395112) ( position: 86 to 135 )&Oligo status:all filters passed&-&Well:15P19...	6.68111e-06	0.81024	9.64579	8
Sm_intergen_3428	-&S._meliloti_chromosome_ig_1015_rc (152 bp, from 2203551 to 2203400) ( position: 5 to 54 )&Oligo status:all filters passed&-&Well:18N11...	8.62391e-06	0.805033	8.81798	8
Sm_intergen_5599	-&S._meliloti_chromosome_ig_189_rc (119 bp, from 423198 to 423080) ( position: 1 to 50 )&Oligo status:all filters passed&-&Well:27I3...	1.47526e-05	0.804737	8.72466	8
SMa1450	-&Probable thiolase&Oligo status:all filters passed&-&Well:3H13...	0.000301577	0.798446	8.66966	8
Sm_intergen_7482	-&S._meliloti_chromosome_ig_787_rc (728 bp, from 1744522 to 1743795) ( position: 235 to 284 )&Oligo status:all filters passed&-&Well:37D1...	6.12463e-05	0.790525	8.30713	8
SMc04040	ibpA&PROBABLE HEAT SHOCK PROTEIN&Oligo status:all filters passed&-&Well:34K04...	0.0008007	0.789274	11.4013	8
Sm_intergen_7405	-&S._meliloti_chromosome_ig_762_rc (654 bp, from 1699144 to 1698491) ( position: 382 to 431 )&Oligo status:all filters passed&-&Well:35G20...	1.20355e-05	0.775069	8.76005	8
SMc02110	-&CONSERVED HYPOTHETICAL PROTEIN&Oligo status:all filters passed&-&Well:28K06...	2.68074e-05	0.76567	10.5522	8
Sm_intergen_2761	-&pSymB_ig_413_rc (115 bp, from 1176826 to 1176712) ( position: 15 to 64 )&Oligo status:all filters passed&-&Well:15I5...	8.9782e-05	0.760374	8.85037	8
Sm_intergen_1348	-&pSymA_ig_5 (1158 bp, from 15094 to 16251) ( position: 55 to 104 )&Oligo status:all filters passed&-&Well:8D13...	1.72686e-05	0.752108	8.72516	8
SMc01718	-&HYPOTHETICAL TRANSMEMBRANE PROTEIN&Oligo status:all filters passed&-&Well:26F04...	0.00266947	0.749653	10.1876	8
SMc02111	-&CONSERVED HYPOTHETICAL PROTEIN&Oligo status:all filters passed&-&Well:28K08...	0.000212518	0.748802	9.63468	8
Sm_intergen_3541	-&S._meliloti_chromosome_ig_1061 (284 bp, from 2289802 to 2290085) ( position: 129 to 178 )&Oligo status:all filters passed&-&Well:18O18...	9.67106e-06	0.738269	8.93187	8
SMc00280	-&CONSERVED HYPOTHETICAL PROTEIN&Oligo status:all filters passed&-&Well:17D12...	0.000345072	0.733223	10.2265	8
Sm_intergen_2888	-&pSymB_ig_465 (117 bp, from 1312723 to 1312839) ( position: 53 to 102 )&Oligo status:all filters passed&-&Well:15H13...	5.58725e-07	0.72538	8.71199	8
Sm_intergen_3177	-&pSymB_ig_57_rc (316 bp, from 160206 to 159891) ( position: 162 to 211 )&Oligo status:all filters passed&-&Well:16I7...	0.000195972	0.724223	10.8253	8
SMc02560	chvI&TRANSCRIPTIONAL REGULATORY PROTEIN&Oligo status:all filters passed&-&Well:30E16...	3.48374e-05	0.720803	9.79744	8
SMb21491	-&hypothetical exported protein&Oligo status:all filters passed&-&Well:14B22...	0.0179908	0.714369	10.3389	8
SMb20949	exoV&putative pyruvyltransferase protein&Oligo status:all filters passed&-&Well:11M21...	0.0368013	0.709188	9.23148	8
Sm_intergen_4714	-&S._meliloti_chromosome_ig_1462 (201 bp, from 3136837 to 3137037) ( position: 58 to 107 )&Oligo status:all filters passed&-&Well:22D20...	0.00261775	0.705796	8.10461	8
Sm_intergen_2457	-&pSymB_ig_291_rc (226 bp, from 785200 to 784975) ( position: 94 to 143 )&Oligo status:all filters passed&-&Well:13I10...	0.00108781	0.704106	9.72523	8
SMc02075	-&CONSERVED HYPOTHETICAL PROTEIN&Oligo status:all filters passed&-&Well:28E08...	0.00195147	0.703088	9.8921	8
Sm_intergen_741	-&pSymA_ig_319 (626 bp, from 682111 to 682736) ( position: 100 to 149 )&Oligo status:all filters passed&-&Well:4E23...	0.0105698	0.701269	11.0106	8
Sm_intergen_4719	-&S._meliloti_chromosome_ig_1464_rc (141 bp, from 3140940 to 3140800) ( position: 35 to 84 )&Oligo status:all filters passed&-&Well:22I20...	0.00275088	0.694951	11.2806	8
SMb20930	-&putative sugar uptake ABC transporter ATP-binding protein&Oligo status:all filters passed&-&Well:11K07...	0.00941331	0.692301	10.9903	8
SMc01774	-&HYPOTHETICAL TRANSMEMBRANE PROTEIN&Oligo status:all filters passed&-&Well:26L16...	9.54877e-06	0.689663	13.2708	8
Sm_intergen_4218	-&S._meliloti_chromosome_ig_1293 (6914 bp, from 2805257 to 2812170) ( position: 6856 to 6905 ), rRNA operon&Oligo status:uniqueness filter failed for at least one oligo in intergenic region&-&Well:21D13...	0.00265135	0.688733	10.8364	8
Sm_intergen_5462	-&S._meliloti_chromosome_ig_1654_rc (442 bp, from 3582240 to 3581799) ( position: 181 to 230 )&Oligo status:all filters passed&-&Well:25P18...	0.000549585	0.688708	8.55573	8
Sm_intergen_6470	-&S._meliloti_chromosome_ig_466_rc (168 bp, from 1044323 to 1044156) ( position: 113 to 162 )&Oligo status:all filters passed&-&Well:31P9...	0.000890065	0.687228	10.6248	8
SMb20037	aroE2&putative shikimate 5-dehydrogenase protein&Oligo status:all filters passed&-&Well:7K03...	0.000179024	0.68368	8.50613	8
SMb20903	-&putative sugar uptake ABC transporter permease protein&Oligo status:all filters passed&-&Well:11G13...	0.000130055	0.681271	8.14002	8
Sm_intergen_5854	-&S._meliloti_chromosome_ig_281 (238 bp, from 633411 to 633648) ( position: 70 to 119 )&Oligo status:all filters passed&-&Well:27H19...	0.000390057	0.681195	8.99824	8
Sm_intergen_2242	-&pSymB_ig_236_rc (427 bp, from 636623 to 636197) ( position: 224 to 273 )&Oligo status:uniqueness filter failed for at least one oligo in intergenic region&-&Well:12B21...	0.000374285	0.678656	8.86455	8
SMc01185	-&HYPOTHETICAL SIGNAL PEPTIDE PROTEIN&Oligo status:all filters passed&-&Well:23O16...	0.0278729	0.666333	9.9943	8
Sm_intergen_5928	-&S._meliloti_chromosome_ig_306_rc (281 bp, from 688770 to 688490) ( position: 92 to 141 )&Oligo status:all filters passed&-&Well:27B24...	0.000178128	0.666147	9.73105	8
SMb21123	-&hypothetical membrane-anchored protein, similar to putative translation initiation inhibitor&Oligo status:all filters passed&-&Well:11J06...	1.00188e-05	0.661929	11.0314	8
Sm_intergen_3412	-&S._meliloti_chromosome_ig_1008_rc (528 bp, from 2188692 to 2188165) ( position: 367 to 416 )&Oligo status:all filters passed&-&Well:18N10...	1.89347e-05	0.66158	10.3133	8
Sm_intergen_4093	-&S._meliloti_chromosome_ig_1261_rc (488 bp, from 2695795 to 2695308) ( position: 133 to 182 )&Oligo status:all filters passed&-&Well:21G5...	0.00847905	0.647822	10.5321	8
Sm_intergen_7161	-&S._meliloti_chromosome_ig_692_rc (103 bp, from 1531837 to 1531735) ( position: 0 to 49 )&Oligo status:all filters passed&-&Well:35C5...	0.00128092	0.644114	10.2742	8
SMc00302	-&CONSERVED HYPOTHETICAL PROTEIN&Oligo status:all filters passed&-&Well:17F24...	0.0148497	0.64319	9.0794	8
Sm_intergen_2717	-&pSymB_ig_397_rc (147 bp, from 1132402 to 1132256) ( position: 25 to 74 )&Oligo status:all filters passed&-&Well:15M2...	0.000590292	0.638801	10.5032	8
Sm_intergen_7457	-&S._meliloti_chromosome_ig_779_rc (493 bp, from 1728411 to 1727919) ( position: 350 to 399 )&Oligo status:all filters passed&-&Well:35K23...	0.000220736	0.63791	9.93992	8
SMc02885	msrA1&PROBABLE PEPTIDE METHIONINE SULFOXIDE REDUCTASE PROTEIN&Oligo status:all filters passed&-&Well:32A21...	0.000150327	0.637196	9.54402	8
Sm_intergen_7265	-&S._meliloti_chromosome_ig_725 (187 bp, from 1607571 to 1607757) ( position: 0 to 49 )&Oligo status:all filters passed&-&Well:35K11...	0.00106003	0.636056	9.17114	8
SMc04267	-&HYPOTHETICAL PROTEIN&Oligo status:all filters passed&-&Well:34H23...	0.00134798	0.635413	8.61545	8
SMb20945	exoF1&hypothetical outer membrane protein, similar to Wza, OMA family&Oligo status:all filters passed&-&Well:11M13...	0.00062664	0.634203	10.3733	8
Sm_intergen_3918	-&S._meliloti_chromosome_ig_1194 (300 bp, from 2550609 to 2550908) ( position: 111 to 160 )&Oligo status:all filters passed&-&Well:19H18...	7.61509e-05	0.627392	8.28403	8
SMa0172	-&conserved hypothetical protein&Oligo status:all filters passed&-&Well:1O05...	0.0051111	0.627291	8.83514	8
Sm_intergen_2484	-&pSymB_ig_300_rc (232 bp, from 811842 to 811611) ( position: 100 to 149 )&Oligo status:all filters passed&-&Well:13D12...	0.0203684	0.62658	8.04996	8
SMc04091	htpX&PUTATIVE PROTEASE TRANSMEMBRANE PROTEIN&Oligo status:all filters passed&-&Well:34O12...	0.000360448	0.624987	8.56038	8
Sm_intergen_5414	-&S._meliloti_chromosome_ig_1635_rc (411 bp, from 3540776 to 3540366) ( position: 160 to 209 )&Oligo status:all filters passed&-&Well:25P15...	3.65598e-06	0.623546	11.1284	8
SMc02349	asfA&PUTATIVE OXIDOREDUCTASE PROTEIN&Oligo status:all filters passed&-&Well:28J05...	4.242e-05	0.622926	8.06293	8
SMc02655	-&HYPOTHETICAL TRANSMEMBRANE PROTEIN&Oligo status:all filters passed&-&Well:30D16...	0.00293434	0.620507	9.82179	8
SMc00301	-&CONSERVED HYPOTHETICAL PROTEIN&Oligo status:all filters passed&-&Well:17F22...	2.31522e-05	0.619565	11.0203	8
SMb20647	-&HYPOTHETICAL PROTEIN&Oligo status:all filters passed&-&Well:9F14...	0.000486489	0.615272	8.26119	8
SMc00093	betA&CHOLINE DEHYDROGENASE CHD OXIDOREDUCTASE FLAVOPROTEIN FAD MEMBRANE&Oligo status:all filters passed&-&Well:17K11...	0.00159452	0.615119	9.50604	8
SMa0551	-&hydrolase, putative&Oligo status:all filters passed&-&Well:1N14...	0.00538865	0.61043	9.08384	8
SMc00669	hutH2&PUTATIVE HISTIDINE AMMONIA-LYASE PROTEIN&Oligo status:all filters passed&-&Well:20G22...	0.0262442	0.608028	8.21179	8
Sm_intergen_2380	-&pSymB_ig_261 (152 bp, from 683777 to 683928) ( position: 60 to 109 )&Oligo status:all filters passed&-&Well:13L5...	0.0176066	0.606562	8.36556	8
Sm_intergen_2588	-&pSymB_ig_344 (119 bp, from 969702 to 969820) ( position: 36 to 85 )&Oligo status:all filters passed&-&Well:13L18...	0.00186535	0.598595	9.68878	8
Sm_intergen_4438	-&S._meliloti_chromosome_ig_1354 (199 bp, from 2929137 to 2929335) ( position: 101 to 150 )&Oligo status:all filters passed&-&Well:22P2...	0.000129136	0.597832	8.72157	8
Sm_intergen_3656	-&S._meliloti_chromosome_ig_1098 (138 bp, from 2368874 to 2369011) ( position: 72 to 121 )&Oligo status:all filters passed&-&Well:19B2...	6.53789e-06	0.594383	8.57282	8
SMb20955	exoK&endo-beta-1,3-1,4-glycanase protein&Oligo status:all filters passed&-&Well:11O09...	0.00188578	0.593059	10.3183	8
SMb21690	exoW&glucosyltransferase protein&Oligo status:all filters passed&-&Well:14L21...	4.32708e-07	0.583312	10.6809	8
SMc03152	-&HYPOTHETICAL TRANSMEMBRANE PROTEIN&Oligo status:all filters passed&-&Well:32O14...	0.000925013	0.583171	8.98592	8
Sm_intergen_333	-&pSymA_ig_189 (592 bp, from 402587 to 403178) ( position: 95 to 144 )&Oligo status:all filters passed&-&Well:2M21...	0.000835138	0.580425	10.0259	8
Sm_intergen_6328	-&S._meliloti_chromosome_ig_411_rc (456 bp, from 923950 to 923495) ( position: 100 to 149 )&Oligo status:all filters passed&-&Well:31B1...	0.00336673	0.578872	10.3545	8
Sm_intergen_7060	-&S._meliloti_chromosome_ig_663 (687 bp, from 1473489 to 1474175) ( position: 239 to 288 )&Oligo status:all filters passed&-&Well:33N22...	0.00285698	0.576356	10.8694	8
SMb20600	-&HYPOTHETICAL PROTEIN&Oligo status:all filters passed&-&Well:9O16...	0.02239	0.568934	9.90187	8
SMc01769	-&HYPOTHETICAL PROTEIN&Oligo status:all filters passed&-&Well:26L06...	0.00133426	0.568225	10.1974	8
SMb20686	-&putative ATP-dependent DNA ligase protein&Oligo status:all filters passed&-&Well:9L16...	0.0035363	0.565586	9.66743	8
Sm_intergen_7317	-&S._meliloti_chromosome_ig_741_rc (218 bp, from 1641206 to 1640989) ( position: 114 to 163 )&Oligo status:all filters passed&-&Well:35O14...	0.000358893	0.561382	8.59756	8
SMc00512	-&CONSERVED HYPOTHETICAL PROTEIN&Oligo status:all filters passed&-&Well:20C01...	0.000325931	0.560919	10.3614	8
Sm_intergen_6336	-&S._meliloti_chromosome_ig_415 (142 bp, from 930660 to 930801) ( position: 0 to 49 )&Oligo status:all filters passed&-&Well:31J1...	0.000128764	0.556876	9.49082	8
SMc02769	-&CONSERVED HYPOTHETICAL TRANSMEMBRANE PROTEIN&Oligo status:all filters passed&-&Well:30B07...	0.000602887	0.554494	10.9181	8
Sm_intergen_3865	-&S._meliloti_chromosome_ig_1173 (671 bp, from 2520322 to 2520992) ( position: 455 to 504 )&Oligo status:all filters passed&-&Well:19C15...	0.00760889	0.553231	13.028	8
SMc02146	-&PUTATIVE PHOSPHATE-BINDING PERIPLASMIC PROTEIN&Oligo status:all filters passed&-&Well:28O12...	0.0056624	0.550832	8.92665	8
Sm_intergen_836	-&pSymA_ig_353_rc (233 bp, from 771034 to 770802) ( position: 8 to 57 )&Oligo status:all filters passed&-&Well:6D5...	0.000192392	0.549417	9.7067	8
SMb20470	-&HYPOTHETICAL PROTEIN&Oligo status:all filters passed&-&Well:9K23...	0.0213167	0.547761	8.45005	8
SMc02435	hemK1&PUTATIVE METHYLTRANSFERASE PROTEIN&Oligo status:all filters passed&-&Well:30E09...	0.00808641	0.546607	8.80733	8
Sm_intergen_2179	-&pSymB_ig_217_rc (134 bp, from 591882 to 591749) ( position: 68 to 117 )&Oligo status:all filters passed&-&Well:12C17...	0.0209032	0.545196	11.1261	8
Sm_intergen_2506	-&pSymB_ig_31 (219 bp, from 79356 to 79574) ( position: 80 to 129 )&Oligo status:all filters passed&-&Well:13J13...	1.90759e-06	0.545065	9.27473	8
SMb20078	-&putative nitratenitrite response regulator protein&Oligo status:all filters passed&-&Well:7O21...	0.0450032	0.543917	8.23958	8
Sm_intergen_1138	-&pSymA_ig_445_rc (788 bp, from 1005037 to 1004250) ( position: 736 to 785 )&Oligo status:all filters passed&-&Well:6B24...	0.000107881	0.540596	9.19326	8
Sm_intergen_462	-&pSymA_ig_224_rc (690 bp, from 469631 to 468942) ( position: 351 to 400 )&Oligo status:all filters passed&-&Well:4N5...	0.0281536	0.537445	8.54328	8
Sm_intergen_3851	-&S._meliloti_chromosome_ig_1167_rc (327 bp, from 2511829 to 2511503) ( position: 104 to 153 )&Oligo status:all filters passed&-&Well:19E14...	0.000127398	0.533845	9.03458	8
SMc00712	-&CONSERVED HYPOTHETICAL TRANSMEMBRANE PROTEIN&Oligo status:all filters passed&-&Well:20O08...	0.0428282	0.530624	9.50184	8
Sm_intergen_5588	-&S._meliloti_chromosome_ig_185 (105 bp, from 416370 to 416474) ( position: 43 to 92 )&Oligo status:all filters passed&-&Well:27N2...	0.00299694	0.530334	10.4234	8
SMc01815	-&PUTATIVE OXIDOREDUCTASE IRON-SULFUR PROTEIN&Oligo status:all filters passed&-&Well:26B23...	0.0119814	0.527681	9.08729	8
Sm_intergen_7806	-&S._meliloti_chromosome_ig_897_rc (476 bp, from 1980206 to 1979731) ( position: 238 to 287 )&Oligo status:all filters passed&-&Well:37H21...	0.00530413	0.527559	8.93853	8
Sm_intergen_3768	-&S._meliloti_chromosome_ig_1140 (1353 bp, from 2474889 to 2476241) ( position: 1263 to 1312 )&Oligo status:uniqueness filter failed for at least one oligo in intergenic region&-&Well:19B9...	0.000109249	0.521652	9.71394	8
SMc03836	tesA&PUTATIVE ACYL-COA THIOESTERASE I PROTEIN&Oligo status:all filters passed&-&Well:32P19...	0.00373559	0.520648	8.57864	8
Sm_intergen_3544	-&S._meliloti_chromosome_ig_1062_rc (116 bp, from 2290646 to 2290531) ( position: 61 to 110 )&Oligo status:all filters passed&-&Well:18B19...	0.0063498	0.518997	8.58529	8
Sm_intergen_2743	-&pSymB_ig_408_rc (223 bp, from 1161365 to 1161143) ( position: 108 to 157 )&Oligo status:all filters passed&-&Well:15G4...	4.90231e-05	0.516695	10.9394	8
Sm_intergen_4929	-&S._meliloti_chromosome_ig_150_rc (462 bp, from 356354 to 355893) ( position: 409 to 458 )&Oligo status:all filters passed&-&Well:24K9...	0.000435425	0.515932	11.403	8
SMc01845	-&PUTATIVE TRANSGLYCOSYLASE TRANSMEMBRANE PROTEIN&Oligo status:all filters passed&-&Well:26H03...	0.00778439	0.51587	10.4982	8
SMc01919	-&HYPOTHETICAL TRANSMEMBRANE PROTEIN&Oligo status:all filters passed&-&Well:26P19...	0.013606	0.515158	8.48319	8
SMb20696	-&HYPOTHETICAL PROTEIN&Oligo status:all filters passed&-&Well:9N08...	0.0283489	0.515062	10.8024	8
SMc04335	-&HYPOTHETICAL LIPOPROTEIN TRANSMEMBRANE&Oligo status:all filters passed&-&Well:36B17...	0.0006121	0.512187	10.6252	8
SMc03961	sqdB&SULFOLIPID (UDP-SULFOQUINOVOSE) BIOSYNTHESIS PROTEIN&Oligo status:all filters passed&-&Well:34O05...	1.96696e-05	0.511555	9.53495	8
SMc01005	folE&PROBABLE GTP CYCLOHYDROLASE I PROTEIN&Oligo status:all filters passed&-&Well:23G13...	6.20972e-05	0.509907	9.49062	8
SMb21328	-&putative Sir2-like transcriptional silencer protein&Oligo status:all filters passed&-&Well:14I13...	0.00540732	0.506867	11.6503	8
SMc02703	-&CONSERVED HYPOTHETICAL PROTEIN&Oligo status:all filters passed&-&Well:30J02...	2.69725e-05	0.506119	10.0468	8
SMc00390	-&HYPOTHETICAL/UNKNOWN PROTEIN&Oligo status:all filters passed&-&Well:17B21...	0.00852489	0.505981	10.1976	8
Sm_intergen_2464	-&pSymB_ig_295 (458 bp, from 800413 to 800870) ( position: 150 to 199 )&Oligo status:uniqueness filter failed for at least one oligo in intergenic region&-&Well:13P10...	0.0116453	0.500597	8.68954	8
SMb20935	exsI&putative transcriptional regulator protein&Oligo status:all filters passed&-&Well:11K17...	0.00688494	0.500313	11.0829	8
Sm_intergen_7547	-&S._meliloti_chromosome_ig_809 (158 bp, from 1776680 to 1776837) ( position: 54 to 103 )&Oligo status:all filters passed&-&Well:37E5...	0.00906883	0.500063	10.4501	8
SMb20920	-&hypothetical secreted protein&Oligo status:all filters passed&-&Well:11I15...	0.00650391	0.49889	11.101	8
SMc00095	betI&TRANSCRIPTION REGULATOR PROTEIN&Oligo status:all filters passed&-&Well:17K15...	0.0119982	0.498713	10.402	8
SMc02278	-&HYPOTHETICAL UNKNOWN TRANSMEMBRANE PROTEIN&Oligo status:all filters passed&-&Well:36L18...	0.00228546	0.494249	8.66177	8
Sm_intergen_3489	-&S._meliloti_chromosome_ig_1039 (166 bp, from 2246510 to 2246675) ( position: 90 to 139 )&Oligo status:all filters passed&-&Well:18K15...	0.0313633	0.492283	8.20202	8
Sm_intergen_7932	-&S._meliloti_chromosome_ig_944 (445 bp, from 2065039 to 2065483) ( position: 368 to 417 )&Oligo status:uniqueness filter failed for at least one oligo in intergenic region&-&Well:39F5...	0.0173554	0.489883	8.83646	8
SMc01905	lon&PROBABLE ATP-DEPENDENT PROTEASE LA PROTEIN&Oligo status:all filters passed&-&Well:26N17...	0.0313736	0.486792	11.1368	8
SMc03847	ccmA&PUTATIVE HEME EXPORTER A (CYTOCHROME C-TYPE BIOGENESIS ATP-BINDING PROTEIN) ABC TRANSPORTER&Oligo status:all filters passed&-&Well:34A19...	0.00352986	0.486474	9.57931	8
Sm_intergen_5904	-&S._meliloti_chromosome_ig_299 (172 bp, from 677770 to 677941) ( position: 28 to 77 )&Oligo status:all filters passed&-&Well:27J22...	0.000403807	0.485731	8.68219	8
Sm_intergen_4589	-&S._meliloti_chromosome_ig_1411_rc (152 bp, from 3042309 to 3042158) ( position: 1 to 50 )&Oligo status:uniqueness filter failed for at least one oligo in intergenic region&-&Well:22G12...	0.00104337	0.48517	10.4392	8
SMc01225	-&PUTATIVE TRANSCRIPTION REGULATOR PROTEIN&Oligo status:all filters passed&-&Well:23F20...	0.035549	0.481651	10.4826	8
SMc02645	cfa2&PUTATIVE CYCLOPROPANE-FATTY-ACYL-PHOSPHOLIPID SYNTHASE PROTEIN&Oligo status:all filters passed&-&Well:30B20...	0.0138228	0.480363	9.32354	8
SMc00743	-&HYPOTHETICAL TRANSMEMBRANE PROTEIN&Oligo status:all filters passed&-&Well:20D16...	0.0364807	0.479189	10.4812	8
SMc02575	hslV&PROBABLE HEAT SHOCK PROTEIN&Oligo status:all filters passed&-&Well:30G22...	0.00577492	0.476353	10.3761	8
Sm_intergen_5463	-&S._meliloti_chromosome_ig_1654_rc (442 bp, from 3582240 to 3581799) ( position: 388 to 437 )&Oligo status:all filters passed&-&Well:25A19...	0.000452441	0.476274	9.38763	8
SMb21605	-&putative sugar uptake ABC transporter ATP-binding protein&Oligo status:all filters passed&-&Well:14F01...	0.000130134	0.469298	11.7282	8
Sm_intergen_3658	-&S._meliloti_chromosome_ig_1099 (172 bp, from 2370228 to 2370399) ( position: 64 to 113 )&Oligo status:all filters passed&-&Well:19D2...	5.02995e-05	0.469181	8.28838	8
Sm_intergen_8042	-&S._meliloti_chromosome_ig_985 (537 bp, from 2156940 to 2157476) ( position: 479 to 528 )&Oligo status:all filters passed&-&Well:39D12...	0.000225665	0.466334	10.6617	8
Sm_intergen_3055	-&pSymB_ig_522 (598 bp, from 1455388 to 1455985) ( position: 388 to 437 )&Oligo status:all filters passed&-&Well:15O23...	0.000521117	0.464581	8.34474	8
SMc00699	-&CONSERVED HYPOTHETICAL PROTEIN&Oligo status:all filters passed&-&Well:20M06...	0.0154292	0.461185	10.8112	8
Sm_intergen_2557	-&pSymB_ig_330_rc (191 bp, from 930553 to 930363) ( position: 21 to 70 )&Oligo status:uniqueness filter failed for at least one oligo in intergenic region&-&Well:13M16...	0.00486931	0.46018	9.55596	8
Sm_intergen_2766	-&pSymB_ig_416 (140 bp, from 1181099 to 1181238) ( position: 33 to 82 )&Oligo status:all filters passed&-&Well:15N5...	0.00365143	0.458864	10.9388	8
SMb20260	-&HYPOTHETICAL PROTEIN&Oligo status:all filters passed&-&Well:7L20...	0.0378985	0.457218	9.86664	8
SMcR1_1341268	SMcR1_1341268&-&Oligo status:all filters passed&-&Well:36A06...	0.0309647	0.452673	10.9027	8
Sm_intergen_5523	-&S._meliloti_chromosome_ig_1678_rc (132 bp, from 3634254 to 3634123) ( position: 82 to 131 )&Oligo status:all filters passed&-&Well:25M22...	0.0095955	0.450963	10.6876	8
Sm_intergen_5367	-&S._meliloti_chromosome_ig_1615_rc (553 bp, from 3500204 to 3499652) ( position: 403 to 452 )&Oligo status:all filters passed&-&Well:25A13...	0.0147515	0.450696	10.9312	8
Sm_intergen_4	-&pSymA_ig_1 (1353 bp, from 1 to 1353) ( position: 374 to 423 )&Oligo status:all filters passed&-&Well:2D1...	0.0271848	0.449075	9.60988	8
SMc00772	potH&PROBABLE PUTRESCINE TRANSPORT SYSTEM PERMEASE PROTEIN&Oligo status:all filters passed&-&Well:20F18...	0.0226707	0.446652	11.7532	8
SMb21056	-&putative protein, similar to esterases&Oligo status:all filters passed&-&Well:11O02...	0.00978269	0.444836	11.3783	8
SMc01016	-&HYPOTHETICAL PROTEIN&Oligo status:all filters passed&-&Well:23I11...	0.00588146	0.444097	8.22364	8
SMc00127	betC&CHOLINE SULFATASE PROTEIN&Oligo status:all filters passed&-&Well:17O15...	0.0476887	0.443105	9.41255	8
SMa1814	-&Putative Dioxygenase&Oligo status:all filters passed&-&Well:5G02...	0.0191081	0.441425	8.29667	8
SMb20208	pqqE&probable pyrroloquinoline quinone synthesis protein E&Oligo status:all filters passed&-&Well:7D22...	0.0292954	0.440493	8.74576	8
Sm_intergen_7407	-&S._meliloti_chromosome_ig_763_rc (108 bp, from 1700159 to 1700052) ( position: 40 to 89 )&Oligo status:all filters passed&-&Well:35I20...	0.00389317	0.438122	10.5363	8
SMb21291	-&putative transcriptional regulator, lysR family protein&Oligo status:all filters passed&-&Well:14C15...	0.0135285	0.438059	10.4356	8
SMc01809	-&PUTATIVE O-ACETYLHOMOSERINE SULFHYDRYLASE PROTEIN&Oligo status:all filters passed&-&Well:26B13...	1.57686e-05	0.437272	10.6935	8
Sm_intergen_2018	-&pSymB_ig_184 (434 bp, from 543548 to 543981) ( position: 161 to 210 )&Oligo status:uniqueness filter failed for at least one oligo in intergenic region&-&Well:12B7...	0.00197497	0.437186	11.3575	8
Sm_intergen_5953	-&S._meliloti_chromosome_ig_313_rc (1067 bp, from 711589 to 710523) ( position: 114 to 163 )&Oligo status:uniqueness filter failed for at least one oligo in intergenic region&-&Well:29K1...	0.0179177	0.435047	11.3444	8
SMc04461	tolB&PROBABLE TOLB PROTEIN PRECURSOR&Oligo status:all filters passed&-&Well:36O13...	0.0173569	0.435012	9.35828	8
Sm_intergen_6546	-&S._meliloti_chromosome_ig_497 (245 bp, from 1096498 to 1096742) ( position: 195 to 244 )&Oligo status:uniqueness filter failed for at least one oligo in intergenic region&-&Well:31L14...	0.0108584	0.431615	8.54356	8
SMc01556	-&CONSERVED HYPOTHETICAL PROTEIN&Oligo status:all filters passed&-&Well:26O13...	0.00928906	0.429619	9.87286	8
Sm_intergen_967	-&pSymA_ig_4 (751 bp, from 13700 to 14450) ( position: 700 to 749 )&Oligo status:all filters passed&-&Well:6G13...	0.0320913	0.429476	8.06296	8
SMc02554	-&CONSERVED HYPOTHETICAL PROTEIN&Oligo status:all filters passed&-&Well:30E04...	0.00234077	0.428775	9.75	8
Sm_intergen_5960	-&S._meliloti_chromosome_ig_314 (828 bp, from 713262 to 714089) ( position: 113 to 162 )&Oligo status:all filters passed&-&Well:29B2...	0.00861331	0.42866	9.42334	8
Sm_intergen_7734	-&S._meliloti_chromosome_ig_872 (352 bp, from 1924385 to 1924736) ( position: 188 to 237 )&Oligo status:all filters passed&-&Well:37P16...	0.000452348	0.425324	9.75555	8
Sm_intergen_6743	-&S._meliloti_chromosome_ig_564 (326 bp, from 1244520 to 1244845) ( position: 142 to 191 )&Oligo status:all filters passed&-&Well:33A3...	0.00100487	0.424078	9.25771	8
SMc02078	exoR&EXOPOLYSACCHARIDE BIOSYNTHESIS REGULATORY PROTEIN&Oligo status:all filters passed&-&Well:28E14...	2.11941e-05	0.423141	9.12167	8
SMc01105	-&PUTATIVE NUCLEOSIDE HYDROLASE PROTEIN&Oligo status:all filters passed&-&Well:23A24...	0.0385777	0.422043	9.66584	8
Sm_intergen_7332	-&S._meliloti_chromosome_ig_749 (308 bp, from 1666428 to 1666735) ( position: 157 to 206 )&Oligo status:all filters passed&-&Well:35N15...	0.0136572	0.421555	8.15941	8
SMa0203	-&putative ABC transporter&Oligo status:all filters passed&-&Well:1A14...	0.00412018	0.418369	9.42814	8
Sm_intergen_507	-&pSymA_ig_239 (329 bp, from 508479 to 508807) ( position: 100 to 149 )&Oligo status:uniqueness filter failed for at least one oligo in intergenic region&-&Well:4K8...	0.0023884	0.416558	9.35999	8
Sm_intergen_1853	-&pSymB_ig_123_rc (278 bp, from 349255 to 348978) ( position: 107 to 156 )&Oligo status:all filters passed&-&Well:10M20...	0.0482071	0.416068	8.09086	8
SMc02267	-&CONSERVED HYPOTHETICAL PROTEIN&Oligo status:all filters passed&-&Well:28P06...	0.00205511	0.415796	9.09922	8
SMc01610	-&PUTATIVE TRANSCRIPTION REGULATOR PROTEIN&Oligo status:all filters passed&-&Well:26G10...	0.000757291	0.414784	10.2817	8
SMc02109	clpA&PROBABLE ATP-DEPENDENT CLP PROTEASE ATP-BINDING SUBUNIT PROTEIN&Oligo status:all filters passed&-&Well:28K04...	0.000241292	0.414033	9.44043	8
SMc01634	-&PUTATIVE PERMEASE ABC TRANSPORTER PROTEIN&Oligo status:all filters passed&-&Well:26K08...	0.0114027	0.407871	11.6918	8
Sm_intergen_6971	-&S._meliloti_chromosome_ig_633 (488 bp, from 1411474 to 1411961) ( position: 210 to 259 )&Oligo status:all filters passed&-&Well:33E17...	0.007829	0.407861	9.63404	8
SMc00885	-&HYPOTHETICAL TRANSMEMBRANE SIGNAL PEPTIDE PROTEIN&Oligo status:all filters passed&-&Well:20F15...	2.50663e-05	0.406732	8.50097	8
Sm_intergen_4973	-&S._meliloti_chromosome_ig_152 (112 bp, from 360055 to 360166) ( position: 39 to 88 )&Oligo status:all filters passed&-&Well:24G12...	0.0172461	0.406575	8.6317	8
SMb20959	exoO&glucosyltransferase protein&Oligo status:all filters passed&-&Well:11O17...	0.0182508	0.406425	8.362	8
Sm_intergen_6229	-&S._meliloti_chromosome_ig_371_rc (116 bp, from 838306 to 838191) ( position: 66 to 115 )&Oligo status:all filters passed&-&Well:29O18...	0.000509485	0.405779	9.04054	8
Sm_intergen_3836	-&S._meliloti_chromosome_ig_1162_rc (370 bp, from 2501357 to 2500988) ( position: 100 to 149 )&Oligo status:uniqueness filter failed for at least one oligo in intergenic region&-&Well:19F13...	0.00196971	0.403161	9.29679	8
SMb21505	wzy&putative membrane protein, similar to Wzy-like polysaccharide polymerase ExoQ&Oligo status:all filters passed&-&Well:14F02...	0.00565271	0.401441	11.6377	8
SMc00468	-&CONSERVED HYPOTHETICAL PROTEIN&Oligo status:all filters passed&-&Well:17L11...	0.0369101	0.400662	8.84827	8
SMc00070	-&CONSERVED HYPOTHETICAL SIGNAL PEPTIDE PROTEIN&Oligo status:all filters passed&-&Well:17G17...	0.0333864	0.39509	10.6456	8
SMb20153	-&hypothetical protein TRANSMEMBRANE&Oligo status:all filters passed&-&Well:7M02...	0.0100021	0.394623	10.7576	8
SMc00362	infC&PROBABLE TRANSLATION INITIATION FACTOR IF-3 PROTEIN&Oligo status:all filters passed&-&Well:17N14...	0.00879909	0.392671	12.4535	8
Sm_intergen_7308	-&S._meliloti_chromosome_ig_739 (372 bp, from 1636939 to 1637310) ( position: 162 to 211 )&Oligo status:all filters passed&-&Well:35F14...	0.0484491	0.392407	11.0098	8
Sm_intergen_2887	-&pSymB_ig_464_rc (387 bp, from 1311686 to 1311300) ( position: 194 to 243 )&Oligo status:all filters passed&-&Well:15G13...	0.0001787	0.392378	8.41448	8
Sm_intergen_6874	-&S._meliloti_chromosome_ig_606 (283 bp, from 1344892 to 1345174) ( position: 76 to 125 )&Oligo status:all filters passed&-&Well:33D11...	0.0265011	0.390253	11.7513	8
Sm_intergen_6242	-&S._meliloti_chromosome_ig_377_rc (278 bp, from 850072 to 849795) ( position: 100 to 149 )&Oligo status:all filters passed&-&Well:29L19...	0.00323238	0.389119	9.09887	8
SMc02989	-&CONSERVED HYPOTHETICAL TRANSMEMBRANE PROTEIN&Oligo status:all filters passed&-&Well:32I15...	0.0209004	0.388436	12.0478	8
SMc01438	degP2&PUTATIVE PROTEASE PRECURSOR SIGNAL PEPTIDE PROTEIN&Oligo status:all filters passed&-&Well:26A03...	0.0221005	0.387392	8.21021	8
Sm_intergen_2446	-&pSymB_ig_288_rc (266 bp, from 773181 to 772916) ( position: 104 to 153 )&Oligo status:all filters passed&-&Well:13N9...	0.00122649	0.386477	10.5587	8
Sm_intergen_2969	-&pSymB_ig_489 (406 bp, from 1373074 to 1373479) ( position: 100 to 149 )&Oligo status:all filters passed&-&Well:15I18...	0.0112673	0.386107	8.58139	8
Sm_intergen_723	-&pSymA_ig_310 (199 bp, from 654535 to 654733) ( position: 116 to 165 )&Oligo status:all filters passed&-&Well:4C22...	0.00267619	0.384563	8.24783	8
SMb20857	-&conserved hypothetical protein&Oligo status:all filters passed&-&Well:9P17...	0.0319557	0.384489	8.31197	8
Sm_intergen_2293	-&pSymB_ig_253_rc (412 bp, from 667137 to 666726) ( position: 145 to 194 )&Oligo status:uniqueness filter failed for at least one oligo in intergenic region&-&Well:12E24...	0.0497626	0.38293	8.1832	8
Sm_intergen_1849	-&pSymB_ig_121_rc (206 bp, from 345733 to 345528) ( position: 84 to 133 )&Oligo status:all filters passed&-&Well:10I20...	0.0316508	0.38098	10.4701	8
Sm_intergen_3599	-&S._meliloti_chromosome_ig_1078_rc (1272 bp, from 2321566 to 2320295) ( position: 267 to 316 )&Oligo status:all filters passed&-&Well:18I22...	0.00694884	0.380563	9.75138	8
SMb21456	-&HYPOTHETICAL PROTEIN&Oligo status:all filters passed&-&Well:14M02...	0.0211926	0.379038	9.85058	8
Sm_intergen_2705	-&pSymB_ig_392 (417 bp, from 1115759 to 1116175) ( position: 358 to 407 )&Oligo status:all filters passed&-&Well:15A2...	0.0124885	0.378393	8.66252	8
Sm_intergen_2022	-&pSymB_ig_184_rc (434 bp, from 543981 to 543548) ( position: 259 to 308 )&Oligo status:uniqueness filter failed for at least one oligo in intergenic region&-&Well:12F7...	0.00597298	0.377953	10.8927	8
SMc01814	-&PROBABLE GLUTAMATE SYNTHASE SMALL CHAIN PROTEIN&Oligo status:all filters passed&-&Well:26B21...	0.00856039	0.376242	8.67032	8
SMb20133	-&CONSERVED HYPOTHETICAL PROTEIN&Oligo status:all filters passed&-&Well:7I10...	0.0336744	0.375231	10.2834	8
Sm_intergen_4590	-&S._meliloti_chromosome_ig_1411_rc (152 bp, from 3042309 to 3042158) ( position: 101 to 150 )&Oligo status:uniqueness filter failed for at least one oligo in intergenic region&-&Well:22H12...	0.00168804	0.374001	9.54876	8
Sm_intergen_5385	-&S._meliloti_chromosome_ig_1623_rc (330 bp, from 3509841 to 3509512) ( position: 154 to 203 )&Oligo status:all filters passed&-&Well:25C14...	0.0165707	0.373561	10.9895	8
SMb20486	-&putative sugar ABC transporter permease protein&Oligo status:all filters passed&-&Well:9O05...	0.0228938	0.372172	9.36864	8
Sm_intergen_4270	-&S._meliloti_chromosome_ig_1293_rc (6914 bp, from 2812170 to 2805257) ( position: 6797 to 6846 ), rRNA operon&Oligo status:uniqueness filter failed for at least one oligo in intergenic region&-&Well:21H16...	0.00794324	0.371285	11.6354	8
SMb20551	-&HYPOTHETICAL PROTEIN&Oligo status:all filters passed&-&Well:9I02...	0.0316519	0.369709	14.7028	8
Sm_intergen_3433	-&S._meliloti_chromosome_ig_1016_rc (789 bp, from 2204782 to 2203994) ( position: 350 to 399 )&Oligo status:all filters passed&-&Well:18C12...	7.0273e-05	0.369236	8.15409	8
Sm_intergen_6708	-&S._meliloti_chromosome_ig_551 (199 bp, from 1218541 to 1218739) ( position: 35 to 84 )&Oligo status:all filters passed&-&Well:31N24...	0.00375587	0.36895	8.33169	8
Sm_intergen_3382	-&S._meliloti_chromosome_ig_1001 (1991 bp, from 2179041 to 2181031) ( position: 1726 to 1775 )&Oligo status:uniqueness filter failed for at least one oligo in intergenic region&-&Well:18P8...	0.0013204	0.368898	8.70094	8
SMa2347	-&conserved hypothetical protein&Oligo status:all filters passed&-&Well:5P13...	0.0139197	0.368437	9.2627	8
Sm_intergen_2824	-&pSymB_ig_440 (116 bp, from 1253065 to 1253180) ( position: 60 to 109 )&Oligo status:all filters passed&-&Well:15H9...	0.00390376	0.368404	8.5457	8
SMa1247	nirV&NirV periplasmic nitrate reductase&Oligo status:all filters passed&-&Well:3F16...	0.000371419	0.367752	8.97438	8
Sm_intergen_1845	-&pSymB_ig_12_rc (298 bp, from 44734 to 44437) ( position: 135 to 184 )&Oligo status:all filters passed&-&Well:10E20...	0.0156788	0.367472	11.6561	8
Sm_intergen_4988	-&S._meliloti_chromosome_ig_1525_rc (122 bp, from 3305618 to 3305497) ( position: 5 to 54 )&Oligo status:all filters passed&-&Well:24F13...	0.0181223	0.365813	10.9689	8
Sm_intergen_5369	-&S._meliloti_chromosome_ig_1616_rc (133 bp, from 3500713 to 3500581) ( position: 68 to 117 )&Oligo status:all filters passed&-&Well:25C13...	0.00191807	0.362851	8.40447	8
SMc01765	-&HYPOTHETICAL TRANSMEMBRANE PROTEIN&Oligo status:all filters passed&-&Well:26J22...	0.0477607	0.360485	9.42191	8
Sm_intergen_7004	-&S._meliloti_chromosome_ig_645_rc (167 bp, from 1441634 to 1441468) ( position: 54 to 103 )&Oligo status:all filters passed&-&Well:33F19...	0.0197827	0.359913	9.28663	8
Sm_intergen_4434	-&S._meliloti_chromosome_ig_1352 (150 bp, from 2925399 to 2925548) ( position: 91 to 140 )&Oligo status:all filters passed&-&Well:22L2...	9.38227e-05	0.359103	9.29262	8
Sm_intergen_253	-&pSymA_ig_163_rc (635 bp, from 348248 to 347614) ( position: 375 to 424 )&Oligo status:all filters passed&-&Well:2M16...	0.0126424	0.358266	8.71568	8
Sm_intergen_5008	-&S._meliloti_chromosome_ig_1534_rc (233 bp, from 3326844 to 3326612) ( position: 82 to 131 )&Oligo status:all filters passed&-&Well:24J14...	5.89054e-05	0.357194	9.40579	8
Sm_intergen_1688	-&pSymA_ig_63 (257 bp, from 145566 to 145822) ( position: 125 to 174 )&Oligo status:all filters passed&-&Well:10H10...	0.0470606	0.355417	8.30627	8
Sm_intergen_5404	-&S._meliloti_chromosome_ig_1632 (341 bp, from 3536407 to 3536747) ( position: 120 to 169 )&Oligo status:all filters passed&-&Well:25F15...	0.000316839	0.354697	9.41442	8
Sm_intergen_1388	-&pSymA_ig_512_rc (466 bp, from 1137545 to 1137080) ( position: 393 to 442 )&Oligo status:all filters passed&-&Well:8L15...	0.000451382	0.354215	8.59621	8
Sm_intergen_2699	-&pSymB_ig_390 (421 bp, from 1113010 to 1113430) ( position: 351 to 400 )&Oligo status:all filters passed&-&Well:15K1...	0.0490141	0.353347	9.60827	8
SMc02350	-&CONSERVED HYPOTHETICAL PROTEIN&Oligo status:all filters passed&-&Well:28J07...	0.0198442	0.351987	10.3958	8
Sm_intergen_4950	-&S._meliloti_chromosome_ig_151 (158 bp, from 359092 to 359249) ( position: 50 to 99 )&Oligo status:all filters passed&-&Well:24P10...	1.41183e-05	0.351823	8.08164	8
SMb21566	groEL5&putative heat shock protein groEL&Oligo status:all filters passed&-&Well:14N18...	0.000246559	0.350915	11.4856	8
Sm_intergen_2863	-&pSymB_ig_454 (600 bp, from 1285663 to 1286262) ( position: 464 to 513 )&Oligo status:all filters passed&-&Well:15O11...	0.00770366	0.350684	10.3892	8
Sm_intergen_2337	-&pSymB_ig_256 (544 bp, from 674031 to 674574) ( position: 351 to 400 )&Oligo status:all filters passed&-&Well:13A3...	0.00106184	0.350037	10.2667	8
SMc02242	-&HYPOTHETICAL TRANSMEMBRANE PROTEIN&Oligo status:all filters passed&-&Well:28L04...	0.00553805	0.34946	10.2377	8
Sm_intergen_3069	-&pSymB_ig_527_rc (120 bp, from 1465403 to 1465284) ( position: 1 to 50 )&Oligo status:all filters passed&-&Well:15M24...	0.00240982	0.346853	10.3636	8
Sm_intergen_3624	-&S._meliloti_chromosome_ig_1086_rc (312 bp, from 2339739 to 2339428) ( position: 106 to 155 )&Oligo status:all filters passed&-&Well:18B24...	0.00893959	0.346219	8.28774	8
Sm_intergen_7705	-&S._meliloti_chromosome_ig_86_rc (410 bp, from 242730 to 242321) ( position: 360 to 409 )&Oligo status:all filters passed&-&Well:37C15...	0.0365912	0.343288	11.6029	8
SMc04018	-&PROBABLE 5'-NUCLEOTIDASE PRECURSOR (SIGNAL PEPTIDE) PROTEIN&Oligo status:all filters passed&-&Well:34G14...	0.0413443	0.342015	9.9295	8
SMa1043	-&hypothetical protein&Oligo status:all filters passed&-&Well:36M12...	0.000313894	0.341001	9.35336	8
Sm_intergen_7526	-&S._meliloti_chromosome_ig_80_rc (478 bp, from 224764 to 224287) ( position: 397 to 446 )&Oligo status:all filters passed&-&Well:37P3...	0.00648155	0.340468	9.41263	8
SMc00170	-&PUTATIVE TRANSCRIPTION REGULATOR HSL-DEPENDENT PROTEIN&Oligo status:all filters passed&-&Well:17G04...	0.0386477	0.340442	8.49478	8
Sm_intergen_4403	-&S._meliloti_chromosome_ig_1343 (1234 bp, from 2916454 to 2917687) ( position: 559 to 608 )&Oligo status:all filters passed&-&Well:21M24...	0.00206623	0.340256	9.74987	8
Sm_intergen_3842	-&S._meliloti_chromosome_ig_1164_rc (434 bp, from 2504356 to 2503923) ( position: 212 to 261 )&Oligo status:all filters passed&-&Well:19L13...	0.000174662	0.339534	10.6041	8
SMc01844	-&HYPOTHETICAL TRANSMEMBRANE PROTEIN&Oligo status:all filters passed&-&Well:26H01...	0.0108315	0.337027	8.5212	8
Sm_intergen_3921	-&S._meliloti_chromosome_ig_1195_rc (259 bp, from 2558559 to 2558301) ( position: 100 to 149 )&Oligo status:all filters passed&-&Well:19K18...	0.0146446	0.336815	10.1429	8
SMc02433	clpB&PROBABLE ATP-DEPENDENT PROTEASE (HEAT SHOCK PROTEIN)&Oligo status:all filters passed&-&Well:30E05...	0.00189189	0.336801	9.44324	8
SMa1657	-&hypothetical protein&Oligo status:all filters passed&-&Well:5I01...	0.0466161	0.333068	10.5229	8
Sm_intergen_2796	-&pSymB_ig_428 (289 bp, from 1228526 to 1228814) ( position: 122 to 171 )&Oligo status:all filters passed&-&Well:15L7...	0.0017369	0.330779	8.36514	8
SMb21383	-&putative SDR family dehydrogenase protein&Oligo status:all filters passed&-&Well:14C02...	0.00125216	0.329856	11.0148	8
SMc02240	-&HYPOTHETICAL TRANSMEMBRANE PROTEIN&Oligo status:all filters passed&-&Well:28J24...	0.0402408	0.329762	8.15151	8
Sm_intergen_1779	-&pSymA_ig_95 (219 bp, from 210132 to 210350) ( position: 79 to 128 )&Oligo status:all filters passed&-&Well:10C16...	8.5548e-05	0.329202	8.57083	8
SMb20727	-&HYPOTHETICAL PROTEIN&Oligo status:all filters passed&-&Well:36C22...	0.0117672	0.328146	11.2323	8
SMb20904	-&putative sugar uptake ABC transporter ATP-binding protein&Oligo status:all filters passed&-&Well:11G15...	0.0104661	0.327994	11.3358	8
Sm_intergen_7346	-&S._meliloti_chromosome_ig_750_rc (1740 bp, from 1668617 to 1666878) ( position: 1101 to 1150 )&Oligo status:uniqueness filter failed for at least one oligo in intergenic region&-&Well:35L16...	0.00255123	0.326965	8.35456	8
SMc02365	degP1&PROTEASE PRECURSOR PROTEIN&Oligo status:all filters passed&-&Well:28L13...	0.0261442	0.326073	9.40056	8
SMb21380	-&putative dioxygenase, slightly similar to catechol 1,2-dioxygenase protein&Oligo status:all filters passed&-&Well:14A20...	0.0102441	0.325927	10.5772	8
Sm_intergen_6922	-&S._meliloti_chromosome_ig_622_rc (256 bp, from 1371000 to 1370745) ( position: 120 to 169 )&Oligo status:all filters passed&-&Well:33D14...	0.00244137	0.325751	8.89911	8
Sm_intergen_5919	-&S._meliloti_chromosome_ig_303_rc (204 bp, from 684838 to 684635) ( position: 54 to 103 )&Oligo status:all filters passed&-&Well:27I23...	0.0279971	0.325719	8.70925	8
SMc00482	-&CONSERVED HYPOTHETICAL PROTEIN&Oligo status:all filters passed&-&Well:17N13...	0.0412983	0.325614	10.0224	8
SMb20906	-&HYPOTHETICAL PROTEIN&Oligo status:all filters passed&-&Well:11G19...	0.00473136	0.325029	14.1806	8
SMa2113	adhC2&probable AdhC2 glutathione-dependent dehydrogenase&Oligo status:uniqueness filter failed&-&Well:36L23...	0.0158828	0.324174	10.4301	8
Sm_intergen_3735	-&S._meliloti_chromosome_ig_1127 (315 bp, from 2436479 to 2436793) ( position: 137 to 186 )&Oligo status:all filters passed&-&Well:19A7...	0.00300909	0.320831	8.74568	8
Sm_intergen_6475	-&S._meliloti_chromosome_ig_469 (271 bp, from 1048614 to 1048884) ( position: 128 to 177 )&Oligo status:all filters passed&-&Well:31E10...	0.047155	0.320704	10.1208	8
Sm_intergen_6067	-&S._meliloti_chromosome_ig_35 (7090 bp, from 81030 to 88119) ( position: 236 to 285 ), rRNA operon&Oligo status:uniqueness filter failed for at least one oligo in intergenic region&-&Well:29M8...	0.0192009	0.3207	11.1745	8
Sm_intergen_829	-&pSymA_ig_350 (102 bp, from 761166 to 761267) ( position: 38 to 87 )&Oligo status:all filters passed&-&Well:6M4...	0.0358759	0.320342	10.1355	8
Sm_intergen_1763	-&pSymA_ig_92 (602 bp, from 204389 to 204990) ( position: 160 to 209 )&Oligo status:all filters passed&-&Well:10C15...	0.0076072	0.319396	9.53507	8
SMc01780	rrpP&PROBABLE H+ TRANSLOCATING PYROPHOSPHATE SYNTHASE TRANSMEMBRANE PROTEIN&Oligo status:all filters passed&-&Well:26N04...	0.00198991	0.3189	10.7238	8
Sm_intergen_4423	-&S._meliloti_chromosome_ig_1348 (552 bp, from 2921529 to 2922080) ( position: 426 to 475 )&Oligo status:all filters passed&-&Well:22A2...	0.00429994	0.318341	10.4569	8
Sm_intergen_7867	-&S._meliloti_chromosome_ig_920 (264 bp, from 2031320 to 2031583) ( position: 113 to 162 )&Oligo status:all filters passed&-&Well:39E1...	0.0110638	0.318265	9.49011	8
SMc02576	-&HYPOTHETICAL ACETYLTRANSFERASE PROTEIN&Oligo status:all filters passed&-&Well:30G24...	0.00476186	0.317378	10.1524	8
Sm_intergen_2	-&pSymA_ig_1 (1353 bp, from 1 to 1353) ( position: 1070 to 1119 )&Oligo status:all filters passed&-&Well:2B1...	1.63026e-05	0.317098	9.7546	8
Sm_intergen_3520	-&S._meliloti_chromosome_ig_1051_rc (158 bp, from 2272581 to 2272424) ( position: 7 to 56 )&Oligo status:all filters passed&-&Well:18J17...	0.0414193	0.316901	9.90695	8
SMc00045	cycF&PUTATIVE CYTOCHROME C SIGNAL PEPTIDE PROTEIN&Oligo status:all filters passed&-&Well:17C23...	0.00115409	0.314041	9.6547	8
Sm_intergen_5955	-&S._meliloti_chromosome_ig_313_rc (1067 bp, from 711589 to 710523) ( position: 366 to 415 )&Oligo status:uniqueness filter failed for at least one oligo in intergenic region&-&Well:29M1...	0.0120088	0.31326	9.563	8
SMc02136	-&CONSERVED HYPOTHETICAL PROTEIN&Oligo status:all filters passed&-&Well:28M16...	0.0327831	0.311361	8.60539	8
SMc02123	-&CONSERVED HYPOTHETICAL PROTEIN&Oligo status:all filters passed&-&Well:28M08...	0.0050454	0.311254	10.2595	8
Sm_intergen_3858	-&S._meliloti_chromosome_ig_1170 (399 bp, from 2517046 to 2517444) ( position: 107 to 156 )&Oligo status:all filters passed&-&Well:19L14...	1.27064e-05	0.311017	10.566	8
Sm_intergen_2027	-&pSymB_ig_185 (1779 bp, from 544349 to 546127) ( position: 1504 to 1553 )&Oligo status:all filters passed&-&Well:12K7...	0.00699682	0.310409	8.03339	8
SMa2259	-&hypothetical protein&Oligo status:all filters passed&-&Well:5H23...	0.00896758	0.30923	9.06551	8
SMc01862	murF&PROBABLE UDP-N-ACETYLMURAMOYLALANYL-D-GLUTAMYL-2, 6-DIAMINOPIMELATE--D-ALANYL-D-ALANYL LIGASE PROTEIN&Oligo status:all filters passed&-&Well:26J13...	0.00292404	0.308925	8.02379	8
SMc01757	-&CONSERVED HYPOTHETICAL PROTEIN&Oligo status:all filters passed&-&Well:26J06...	0.0230914	0.306817	8.59111	8
SMc01834	-&CONSERVED HYPOTHETICAL PROTEIN&Oligo status:all filters passed&-&Well:26F13...	0.00132992	0.304836	9.10733	8
SMa2273	-&hypothetical protein&Oligo status:all filters passed&-&Well:5J13...	0.0019359	0.30483	12.3817	8
Sm_intergen_1522	-&pSymA_ig_547_rc (455 bp, from 1222966 to 1222512) ( position: 313 to 362 )&Oligo status:uniqueness filter failed for at least one oligo in intergenic region&-&Well:8B24...	0.00770392	0.302931	11.0312	8
Sm_intergen_5603	-&S._meliloti_chromosome_ig_190_rc (280 bp, from 424367 to 424088) ( position: 120 to 169 )&Oligo status:all filters passed&-&Well:27M3...	0.00342745	0.300322	11.4214	8
Sm_intergen_3958	-&S._meliloti_chromosome_ig_121 (319 bp, from 309670 to 309988) ( position: 200 to 249 )&Oligo status:all filters passed&-&Well:19P20...	0.0244036	0.300176	9.66567	8
SMc02569	hisF&PROBABLE CYCLASE PROTEIN&Oligo status:all filters passed&-&Well:30G10...	0.00471707	0.299061	11.5337	8
SMc02243	-&HYPOTHETICAL TRANSMEMBRANE PROTEIN&Oligo status:all filters passed&-&Well:28L06...	0.0146049	0.298607	12.4992	8
SMa1113	-&putative cytochrome C fragment&Oligo status:all filters passed&-&Well:36M18...	0.00882866	0.298338	9.66774	8
SMc04305	cobP&PROBABLE BIFUNCTIONAL COBALAMIN BIOSYNTHESIS PROTEIN (INCLUDES: COBINAMIDE KINASE AND COBINAMIDE PHOSPHATE GUANYLYLTRANSFERASE)&Oligo status:all filters passed&-&Well:34P03...	0.00463658	0.298219	10.0363	8
Sm_intergen_928	-&pSymA_ig_388 (1236 bp, from 882017 to 883252) ( position: 510 to 559 )&Oligo status:all filters passed&-&Well:6P10...	0.0422548	0.296987	8.99911	8
Sm_intergen_1946	-&pSymB_ig_163 (176 bp, from 478135 to 478310) ( position: 24 to 73 )&Oligo status:all filters passed&-&Well:12J2...	0.0298485	0.296078	12.6343	8
SMc02735	-&HYPOTHETICAL PROTEIN&Oligo status:all filters passed&-&Well:30N12...	5.61186e-06	0.295849	9.45218	8
Sm_intergen_5383	-&S._meliloti_chromosome_ig_1622_rc (207 bp, from 3509102 to 3508896) ( position: 100 to 149 )&Oligo status:all filters passed&-&Well:25A14...	0.0023615	0.294346	8.73328	8
Sm_intergen_5272	-&S._meliloti_chromosome_ig_1584_rc (511 bp, from 3433274 to 3432764) ( position: 384 to 433 )&Oligo status:all filters passed&-&Well:25B7...	0.00648818	0.294286	8.37146	8
Sm_intergen_1194	-&pSymA_ig_459_rc (210 bp, from 1026984 to 1026775) ( position: 73 to 122 )&Oligo status:all filters passed&-&Well:8J3...	0.0180511	0.293299	8.42086	8
SMc01581	-&HYPOTHETICAL TRANSMEMBRANE PROTEIN&Oligo status:all filters passed&-&Well:26C14...	0.00495149	0.292821	11.0018	8
SMc01107	-&CONSERVED HYPOTHETICAL PROTEIN&Oligo status:all filters passed&-&Well:23C04...	0.0147784	0.292189	10.0184	8
SMc02858	dnaJ&PROBABLE CHAPERONE PROTEIN&Oligo status:all filters passed&-&Well:30N13...	0.00021576	0.292073	9.80771	8
Sm_intergen_210	-&pSymA_ig_153 (524 bp, from 334594 to 335117) ( position: 241 to 290 )&Oligo status:all filters passed&-&Well:2B14...	0.0120304	0.291417	8.687	8
Sm_intergen_1503	-&pSymA_ig_545 (1126 bp, from 1220355 to 1221480) ( position: 1056 to 1105 )&Oligo status:all filters passed&-&Well:8O22...	0.00131832	0.291368	8.57942	8
Sm_intergen_7538	-&S._meliloti_chromosome_ig_804_rc (356 bp, from 1770238 to 1769883) ( position: 206 to 255 )&Oligo status:all filters passed&-&Well:37L4...	0.00458826	0.290107	9.72042	8
Sm_intergen_2085	-&pSymB_ig_196_rc (869 bp, from 567528 to 566660) ( position: 542 to 591 )&Oligo status:all filters passed&-&Well:12E11...	0.0381765	0.289805	10.5111	8
Sm_intergen_517	-&pSymA_ig_241 (643 bp, from 510211 to 510853) ( position: 248 to 297 )&Oligo status:all filters passed&-&Well:4E9...	0.0410475	0.289561	10.5962	8
Sm_intergen_4111	-&S._meliloti_chromosome_ig_127 (323 bp, from 317510 to 317832) ( position: 104 to 153 )&Oligo status:all filters passed&-&Well:21I6...	0.0067978	0.289402	10.3796	8
SMc04304	cobW&PROBABLE COBALAMINE BIOSYNTHESIS PROTEIN&Oligo status:all filters passed&-&Well:34P01...	0.0171602	0.288939	10.5629	8
Sm_intergen_511	-&pSymA_ig_24 (470 bp, from 59234 to 59703) ( position: 193 to 242 )&Oligo status:all filters passed&-&Well:4O8...	0.0219745	0.288342	10.47	8
Sm_intergen_3569	-&S._meliloti_chromosome_ig_107 (377 bp, from 285928 to 286304) ( position: 174 to 223 )&Oligo status:all filters passed&-&Well:18K20...	0.0285998	0.287849	10.3532	8
Sm_intergen_6384	-&S._meliloti_chromosome_ig_434 (105 bp, from 979627 to 979731) ( position: 37 to 86 )&Oligo status:all filters passed&-&Well:31J4...	0.0257028	0.287522	8.72021	8
Sm_intergen_3817	-&S._meliloti_chromosome_ig_1155 (376 bp, from 2490652 to 2491027) ( position: 218 to 267 )&Oligo status:all filters passed&-&Well:19C12...	0.00397017	0.286631	9.48046	8
Sm_intergen_3672	-&S._meliloti_chromosome_ig_1102 (128 bp, from 2375891 to 2376018) ( position: 12 to 61 )&Oligo status:all filters passed&-&Well:19B3...	0.00160572	0.286424	8.83823	8
SMc03068	edd&PHOSPHOGLUCONATE DEHYDRATASE PROTEIN&Oligo status:all filters passed&-&Well:32E04...	0.0450476	0.283661	9.38468	8
Sm_intergen_4276	-&S._meliloti_chromosome_ig_1294_rc (343 bp, from 2817138 to 2816796) ( position: 192 to 241 )&Oligo status:all filters passed&-&Well:21N16...	0.00183306	0.283379	10.3462	8
Sm_intergen_5373	-&S._meliloti_chromosome_ig_1618_rc (116 bp, from 3501860 to 3501745) ( position: 64 to 113 )&Oligo status:all filters passed&-&Well:25G13...	0.00241648	0.282952	9.09961	8
Sm_intergen_1966	-&pSymB_ig_170 (275 bp, from 499561 to 499835) ( position: 168 to 217 )&Oligo status:all filters passed&-&Well:12N3...	0.00141527	0.282566	8.51548	8
Sm_intergen_5761	-&S._meliloti_chromosome_ig_247_rc (160 bp, from 548970 to 548811) ( position: 40 to 89 )&Oligo status:all filters passed&-&Well:27K13...	0.00251838	0.280813	13.1217	8
Sm_intergen_7459	-&S._meliloti_chromosome_ig_78_rc (115 bp, from 214914 to 214800) ( position: 30 to 79 )&Oligo status:all filters passed&-&Well:35M23...	0.0279518	0.279211	10.2602	8
SMb21494	ocd&putative ornithine cyclodeaminase protein&Oligo status:all filters passed&-&Well:14D04...	0.00138913	0.278796	11.7729	8
SMc00338	-&CONSERVED HYPOTHETICAL PROTEIN&Oligo status:all filters passed&-&Well:17J18...	0.00132129	0.278116	8.37542	8
Sm_intergen_5001	-&S._meliloti_chromosome_ig_1531 (184 bp, from 3319460 to 3319643) ( position: 40 to 89 )&Oligo status:all filters passed&-&Well:24C14...	0.000633651	0.277021	8.29087	8
SMa0758	-&hypothetical protein with local conservation&Oligo status:uniqueness filter failed&-&Well:36F05...	0.0367509	0.277015	9.31061	8
Sm_intergen_5657	-&S._meliloti_chromosome_ig_213_rc (291 bp, from 477420 to 477130) ( position: 55 to 104 )&Oligo status:all filters passed&-&Well:27C7...	0.0369232	0.276171	9.318	8
Sm_intergen_3283	-&pSymB_ig_68_rc (175 bp, from 194927 to 194753) ( position: 46 to 95 )&Oligo status:uniqueness filter failed for at least one oligo in intergenic region&-&Well:18M2...	0.0348719	0.275981	9.08086	8
SMc01011	-&CONSERVED HYPOTHETICAL PROTEIN&Oligo status:all filters passed&-&Well:23I01...	0.00082193	0.27451	9.70106	8
Sm_intergen_5731	-&S._meliloti_chromosome_ig_242 (321 bp, from 540595 to 540915) ( position: 100 to 149 )&Oligo status:all filters passed&-&Well:27M11...	0.0334399	0.273646	9.21843	8
SMb20451	-&CONSERVED HYPOTHETICAL PROTEIN&Oligo status:all filters passed&-&Well:9I09...	0.00016141	0.272744	14.4164	8
SMc02443	grxC&PROBABLE GLUTAREDOXIN 3 PROTEIN&Oligo status:all filters passed&-&Well:30G01...	0.0426269	0.272479	8.79241	8
SMb20172	-&putative cytochrome c protein&Oligo status:all filters passed&-&Well:7O14...	0.00060804	0.272246	9.05704	8
Sm_intergen_7869	-&S._meliloti_chromosome_ig_921 (173 bp, from 2033213 to 2033385) ( position: 120 to 169 )&Oligo status:all filters passed&-&Well:39G1...	0.0337943	0.271832	8.96227	8
SMc02102	-&CONSERVED HYPOTHETICAL TRANSMEMBRANE PROTEIN&Oligo status:all filters passed&-&Well:28I14...	0.00299893	0.270693	8.45376	8
SMc02344	-&PUTATIVE PERIPLASMIC BINDING PROTEIN&Oligo status:all filters passed&-&Well:28H21...	0.0211715	0.269718	10.5908	8
Sm_intergen_5086	-&S._meliloti_chromosome_ig_1557_rc (863 bp, from 3369116 to 3368254) ( position: 588 to 637 )&Oligo status:uniqueness filter failed for at least one oligo in intergenic region&-&Well:24H19...	0.00348863	0.269428	8.27385	8
Sm_intergen_5946	-&S._meliloti_chromosome_ig_313 (1067 bp, from 710523 to 711589) ( position: 204 to 253 )&Oligo status:uniqueness filter failed for at least one oligo in intergenic region&-&Well:29D1...	0.00183985	0.268416	9.26442	8
SMc04218	-&PUTATIVE TRANSPORT TRANSMEMBRANE PROTEIN&Oligo status:all filters passed&-&Well:34P22...	0.00546474	0.26533	8.78281	8
SMb21001	-&hypothetical exported protein&Oligo status:all filters passed&-&Well:11G06...	0.0228598	0.263384	12.5964	8
SMa1010	-&hypothetical protein&Oligo status:all filters passed&-&Well:3A24...	0.0344535	0.261198	14.8926	8
SMc01828	-&PUTATIVE TRANSPORT TRANSMEMBRANE PROTEIN&Oligo status:all filters passed&-&Well:26F01...	0.0231957	0.26054	9.25945	8
SMc03925	pgm&PROBABLE PHOSPHOGLUCOMUTASE (GLUCOSE PHOSPHOMUTASE) PROTEIN&Oligo status:all filters passed&-&Well:34K05...	0.00445393	0.25987	9.89319	8
Sm_intergen_3972	-&S._meliloti_chromosome_ig_1215 (611 bp, from 2594924 to 2595534) ( position: 354 to 403 )&Oligo status:all filters passed&-&Well:19N21...	0.0184534	0.258987	12.056	8
SMc00650	-&HYPOTHETICAL TRANSMEMBRANE PROTEIN&Oligo status:all filters passed&-&Well:20E12...	0.00654992	0.258954	9.15646	8
SMb21467	-&HYPOTHETICAL PROTEIN&Oligo status:all filters passed&-&Well:14M22...	0.0327565	0.258812	11.6226	8
Sm_intergen_946	-&pSymA_ig_391_rc (451 bp, from 890927 to 890477) ( position: 390 to 439 )&Oligo status:all filters passed&-&Well:6B12...	0.00360333	0.258465	9.44617	8
Sm_intergen_789	-&pSymA_ig_335_rc (599 bp, from 724533 to 723935) ( position: 102 to 151 )&Oligo status:all filters passed&-&Well:6E2...	0.0204677	0.255874	9.12521	8
Sm_intergen_4426	-&S._meliloti_chromosome_ig_1349 (376 bp, from 2922781 to 2923156) ( position: 108 to 157 )&Oligo status:all filters passed&-&Well:22D2...	0.00035163	0.255168	9.92077	6
Sm_intergen_3706	-&S._meliloti_chromosome_ig_1117 (638 bp, from 2403723 to 2404360) ( position: 138 to 187 )&Oligo status:uniqueness filter failed for at least one oligo in intergenic region&-&Well:19D5...	0.0219689	0.255106	9.2091	8
Sm_intergen_5962	-&S._meliloti_chromosome_ig_314 (828 bp, from 713262 to 714089) ( position: 509 to 558 )&Oligo status:all filters passed&-&Well:29D2...	0.0399242	0.254027	9.94134	8
Sm_intergen_5415	-&S._meliloti_chromosome_ig_1635_rc (411 bp, from 3540776 to 3540366) ( position: 361 to 410 )&Oligo status:all filters passed&-&Well:25A16...	0.0131531	0.252276	10.7489	8
SMc01160	-&CONSERVED HYPOTHETICAL PROTEIN&Oligo status:all filters passed&-&Well:23K14...	0.0197104	0.251757	8.33301	8
SMb20952	-&HYPOTHETICAL PROTEIN&Oligo status:all filters passed&-&Well:11O03...	0.0356546	0.249058	10.0268	8
Sm_intergen_4432	-&S._meliloti_chromosome_ig_1351 (366 bp, from 2924432 to 2924797) ( position: 168 to 217 )&Oligo status:all filters passed&-&Well:22J2...	0.0118079	0.249054	11.2937	8
Sm_intergen_33	-&pSymA_ig_104 (532 bp, from 233029 to 233560) ( position: 108 to 157 )&Oligo status:all filters passed&-&Well:2A3...	0.0435805	0.24905	10.8088	8
Sm_intergen_7306	-&S._meliloti_chromosome_ig_738_rc (472 bp, from 1635650 to 1635179) ( position: 237 to 286 )&Oligo status:uniqueness filter failed for at least one oligo in intergenic region&-&Well:35D14...	0.0389001	0.248876	8.81649	8
Sm_intergen_7885	-&S._meliloti_chromosome_ig_929 (207 bp, from 2047367 to 2047573) ( position: 3 to 52 )&Oligo status:all filters passed&-&Well:39G2...	0.0395995	0.248115	8.08268	8
Sm_intergen_7024	-&S._meliloti_chromosome_ig_650_rc (417 bp, from 1452723 to 1452307) ( position: 356 to 405 )&Oligo status:all filters passed&-&Well:33J20...	0.0036178	0.248061	8.0102	8
SMc00075	rimJ&PROBABLE RIBOSOMAL-PROTEIN-ALANINE ACETYLTRANSFERASE&Oligo status:all filters passed&-&Well:17I03...	0.0408187	0.246754	8.97341	8
Sm_intergen_1569	-&pSymA_ig_562 (959 bp, from 1262337 to 1263295) ( position: 744 to 793 )&Oligo status:uniqueness filter failed for at least one oligo in intergenic region&-&Well:10A3...	0.00637415	0.246562	9.37341	8
Sm_intergen_3175	-&pSymB_ig_569_rc (231 bp, from 1573066 to 1572836) ( position: 81 to 130 )&Oligo status:uniqueness filter failed for at least one oligo in intergenic region&-&Well:16G7...	0.0223253	0.246001	8.68685	8
SMc02120	aapM&PROBABLE GENERAL L-AMINO ACID TRANSPORT PERMEASE ABC TRANSPORTER PROTEIN&Oligo status:all filters passed&-&Well:28M02...	0.0294962	0.244885	8.82968	8
Sm_intergen_1937	-&pSymB_ig_16 (462 bp, from 54629 to 55090) ( position: 393 to 442 )&Oligo status:all filters passed&-&Well:12A2...	0.0233969	0.244501	8.56264	8
Sm_intergen_2458	-&pSymB_ig_292 (209 bp, from 786429 to 786637) ( position: 62 to 111 )&Oligo status:all filters passed&-&Well:13J10...	0.0153506	0.244425	8.78392	8
SMc03148	-&HYPOTHETICAL PROTEIN&Oligo status:all filters passed&-&Well:32O06...	0.0409003	0.242869	8.14375	8
SMc00554	purF&PROBABLE AMIDOPHOSPHORIBOSYLTRANSFERASE, PRPP AMIDOTRANSFERASE PROTEIN&Oligo status:all filters passed&-&Well:20G21...	0.0103153	0.24272	9.60763	8
SMc00722	-&HYPOTHETICAL TRANSMEMBRANE PROTEIN&Oligo status:all filters passed&-&Well:20B04...	0.000389479	0.24151	10.4764	8
Sm_intergen_3882	-&S._meliloti_chromosome_ig_118_rc (400 bp, from 303335 to 302936) ( position: 177 to 226 )&Oligo status:all filters passed&-&Well:19D16...	0.0361545	0.240539	9.30055	8
Sm_intergen_3946	-&S._meliloti_chromosome_ig_1204_rc (415 bp, from 2569478 to 2569064) ( position: 360 to 409 )&Oligo status:all filters passed&-&Well:19D20...	0.0126999	0.24024	10.6784	8
SMb21026	-&hypothetical exopeptide protein&Oligo status:all filters passed&-&Well:36D16...	0.0213134	0.239868	9.21153	8
Sm_intergen_2541	-&pSymB_ig_324_rc (199 bp, from 908169 to 907971) ( position: 0 to 49 )&Oligo status:all filters passed&-&Well:13M15...	0.0488615	0.238918	8.57204	8
Sm_intergen_3299	-&pSymB_ig_73 (284 bp, from 213409 to 213692) ( position: 96 to 145 )&Oligo status:all filters passed&-&Well:18M3...	0.0431632	0.238492	9.67401	8
Sm_intergen_6261	-&S._meliloti_chromosome_ig_386 (121 bp, from 866500 to 866620) ( position: 65 to 114 )&Oligo status:all filters passed&-&Well:29O20...	0.0340381	0.238211	11.071	8
SMb20880	rhlE2&putative ATP-dependent RNA helicase protein&Oligo status:all filters passed&-&Well:11C15...	0.0190252	0.238108	11.3573	8
Sm_intergen_1375	-&pSymA_ig_508 (138 bp, from 1127479 to 1127616) ( position: 64 to 113 )&Oligo status:all filters passed&-&Well:8O14...	0.0152447	0.237608	12.7007	8
Sm_intergen_5012	-&S._meliloti_chromosome_ig_1536_rc (152 bp, from 3330830 to 3330679) ( position: 94 to 143 )&Oligo status:all filters passed&-&Well:24N14...	0.0499706	0.237384	10.1776	8
SMa1001	-&hypothetical protein&Oligo status:all filters passed&-&Well:3A12...	0.00246923	0.233801	10.5984	8
SMb20882	-&hypothetical protein, similar to N-terminal part of efflux system&Oligo status:all filters passed&-&Well:11C19...	0.0416173	0.233633	9.33351	8
Sm_intergen_6406	-&S._meliloti_chromosome_ig_442_rc (403 bp, from 992038 to 991636) ( position: 350 to 399 )&Oligo status:all filters passed&-&Well:31P5...	0.0509553	0.233268	10.884	8
Sm_intergen_5587	-&S._meliloti_chromosome_ig_184_rc (342 bp, from 415411 to 415070) ( position: 125 to 174 )&Oligo status:all filters passed&-&Well:27M2...	0.00230761	0.233234	8.45694	8
SMc03985	cyaF2&PROBABLE ADENYLATE/GUANYLATE CYCLASE PROTEIN&Oligo status:all filters passed&-&Well:34C04...	0.00597765	0.233065	8.54434	8
Sm_intergen_6017	-&S._meliloti_chromosome_ig_333_rc (198 bp, from 770925 to 770728) ( position: 47 to 96 )&Oligo status:all filters passed&-&Well:29K5...	0.000940162	0.231187	9.16864	8
Sm_intergen_6371	-&S._meliloti_chromosome_ig_428_rc (474 bp, from 959627 to 959154) ( position: 419 to 468 )&Oligo status:uniqueness filter failed for at least one oligo in intergenic region&-&Well:31M3...	0.010166	0.229594	9.4169	8
Sm_intergen_6309	-&S._meliloti_chromosome_ig_404_rc (296 bp, from 911877 to 911582) ( position: 134 to 183 )&Oligo status:all filters passed&-&Well:29O23...	0.0396189	0.229244	8.58543	8
SMc00117	-&CONSERVED HYPOTHETICAL PROTEIN&Oligo status:all filters passed&-&Well:17O05...	0.0352548	0.228917	10.3048	8
Sm_intergen_4880	-&S._meliloti_chromosome_ig_1485_rc (6791 bp, from 3214897 to 3208107) ( position: 6670 to 6719 ), rRNA operon&Oligo status:uniqueness filter failed for at least one oligo in intergenic region&-&Well:24J6...	0.00267242	0.228627	11.048	8
SMc00646	rpoH1&PROBABLE RNA POLYMERASE SIGMA-32 FACTOR HEAT SHOCK REGULATORY PROTEIN&Oligo status:all filters passed&-&Well:20E04...	1.24162e-12	0.228612	10.1873	136
Sm_intergen_1469	-&pSymA_ig_536_rc (740 bp, from 1191694 to 1190955) ( position: 180 to 229 )&Oligo status:all filters passed&-&Well:8M20...	0.0118747	0.228527	10.0405	8
SMc02493	-&HYPOTHETICAL PROTEIN&Oligo status:all filters passed&-&Well:30M11...	0.0367931	0.228431	11.721	8
SMc01595	-&PUTATIVE SENSOR HISTIDINE KINASE TRANSMEMBRANE PROTEIN&Oligo status:all filters passed&-&Well:26E16...	0.0106969	0.228017	10.4564	8
SMb21319	expA1&putative membrane-anchored protein&Oligo status:all filters passed&-&Well:14G19...	0.000232448	0.226274	10.7964	8
Sm_intergen_7334	-&S._meliloti_chromosome_ig_75 (218 bp, from 209547 to 209764) ( position: 68 to 117 )&Oligo status:all filters passed&-&Well:35P15...	0.0435516	0.226147	8.92365	8
Sm_intergen_883	-&pSymA_ig_371_rc (430 bp, from 824592 to 824163) ( position: 27 to 76 )&Oligo status:all filters passed&-&Well:6C8...	0.00652774	0.225428	11.0036	8
SMb20225	smc22none1&probable osmotically inducible sensory protein&Oligo status:all filters passed&-&Well:7H02...	0.0356388	0.225237	11.1935	8
SMc01827	-&HYPOTHETICAL PROTEIN&Oligo status:all filters passed&-&Well:26D23...	0.0019809	0.225101	8.57891	8
Sm_intergen_5601	-&S._meliloti_chromosome_ig_19_rc (303 bp, from 46280 to 45978) ( position: 104 to 153 )&Oligo status:all filters passed&-&Well:27K3...	0.0424815	0.224332	9.08666	8
SMa0160	-&putative GntR-family transcription regulator&Oligo status:all filters passed&-&Well:1M13...	0.00565269	0.223759	9.38489	8
SMc00575	-&CONSERVED HYPOTHETICAL PROTEIN&Oligo status:all filters passed&-&Well:20K13...	0.044773	0.223204	10.1604	8
Sm_intergen_5083	-&S._meliloti_chromosome_ig_1557_rc (863 bp, from 3369116 to 3368254) ( position: 100 to 149 )&Oligo status:uniqueness filter failed for at least one oligo in intergenic region&-&Well:24E19...	0.0231936	0.222356	8.56301	8
Sm_intergen_5386	-&S._meliloti_chromosome_ig_1624 (244 bp, from 3510659 to 3510902) ( position: 94 to 143 )&Oligo status:all filters passed&-&Well:25D14...	0.0372105	0.221625	8.1388	8
SMc04434	rpmH&PROBABLE 50S RIBOSOMAL PROTEIN L34&Oligo status:all filters passed&-&Well:36B23...	0.0126046	0.221344	12.9579	8
SMa1104	-&hypothetical protein fragment&Oligo status:all filters passed&-&Well:3I14...	0.0277891	0.219019	8.21397	8
Sm_intergen_4000	-&S._meliloti_chromosome_ig_1227_rc (208 bp, from 2620654 to 2620447) ( position: 70 to 119 )&Oligo status:all filters passed&-&Well:19J23...	0.016503	0.218793	11.4472	8
Sm_intergen_4077	-&S._meliloti_chromosome_ig_1255 (128 bp, from 2683162 to 2683289) ( position: 68 to 117 )&Oligo status:all filters passed&-&Well:21G4...	0.0204338	0.215621	9.41584	7
SMa0193	-&hypothetical protein&Oligo status:all filters passed&-&Well:1A04...	0.0161211	0.215296	13.165	8
Sm_intergen_5998	-&S._meliloti_chromosome_ig_327_rc (560 bp, from 756368 to 755809) ( position: 203 to 252 )&Oligo status:uniqueness filter failed for at least one oligo in intergenic region&-&Well:29H4...	0.0100259	0.212017	9.50551	8
Sm_intergen_779	-&pSymA_ig_331 (105 bp, from 709665 to 709769) ( position: 53 to 102 )&Oligo status:all filters passed&-&Well:6K1...	0.0151329	0.211265	8.45298	8
SMb21343	-&putative sugar uptake ABC transporter permease protein&Oligo status:all filters passed&-&Well:14K17...	0.00283307	0.210364	8.93699	8
Sm_intergen_682	-&pSymA_ig_295_rc (794 bp, from 608683 to 607890) ( position: 718 to 767 )&Oligo status:all filters passed&-&Well:4J19...	0.0443024	0.210311	9.74989	8
Sm_intergen_979	-&pSymA_ig_402 (1268 bp, from 908914 to 910181) ( position: 1214 to 1263 )&Oligo status:all filters passed&-&Well:6C14...	0.0163278	0.209737	10.6147	8
Sm_intergen_604	-&pSymA_ig_27_rc (286 bp, from 65491 to 65206) ( position: 165 to 214 )&Oligo status:all filters passed&-&Well:4L14...	0.0437415	0.20898	9.31306	8
Sm_intergen_2301	-&pSymB_ig_254 (1719 bp, from 667616 to 669334) ( position: 775 to 824 )&Oligo status:all filters passed&-&Well:12M24...	0.00985287	0.208719	9.01768	8
Sm_intergen_861	-&pSymA_ig_363_rc (451 bp, from 799195 to 798745) ( position: 129 to 178 )&Oligo status:all filters passed&-&Well:6M6...	0.0281935	0.204948	8.91665	8
Sm_intergen_6190	-&S._meliloti_chromosome_ig_36 (142 bp, from 93146 to 93287) ( position: 49 to 98 )&Oligo status:all filters passed&-&Well:29H16...	0.0130804	0.204106	8.34174	8
SMb20006	-&HYPOTHETICAL PROTEIN&Oligo status:all filters passed&-&Well:7E13...	0.0407933	0.201157	9.58745	8
SMc02648	-&PUTATIVE TRANSPORT TRANSMEMBRANE PROTEIN&Oligo status:all filters passed&-&Well:30D02...	0.0213343	0.19999	9.27698	8
SMb21570	stcD2&putative NADH-dependent oxidase protein&Oligo status:all filters passed&-&Well:14P02...	0.0414787	0.198384	12.2185	8
SMa2087	-&hypothetical protein&Oligo status:all filters passed&-&Well:5N02...	0.0184809	0.198315	8.28339	8
SMc00395	pfs&PUTATIVE MTA/SAH NUCLEOSIDASE P46 INCLUDES: 5'-METHYLTHIOADENOSINE NUCLEOSIDASE AND S-ADENOSYLHOMOCYSTEINE NUCLEOSIDASE PROTEIN&Oligo status:all filters passed&-&Well:17D05...	0.00103754	0.197986	11.0344	8
SMc00138	-&PUTATIVE AMINO ACID TRANSPORT SYSTEM PERMEASE PROTEIN&Oligo status:all filters passed&-&Well:17A14...	0.0266578	0.196803	8.90126	8
SMc02753	-&PUTATIVE IIA COMPONENT OF PTS SYSTEM PROTEIN&Oligo status:all filters passed&-&Well:30N24...	0.0302892	0.196749	10.9215	8
Sm_intergen_6167	-&S._meliloti_chromosome_ig_351_rc (201 bp, from 806545 to 806345) ( position: 81 to 130 )&Oligo status:all filters passed&-&Well:29A15...	0.0447544	0.196472	9.13479	8
Sm_intergen_2910	-&pSymB_ig_473 (1016 bp, from 1324875 to 1325890) ( position: 734 to 783 )&Oligo status:uniqueness filter failed for at least one oligo in intergenic region&-&Well:15N14...	0.0163774	0.19639	9.18827	8
Sm_intergen_2555	-&pSymB_ig_330 (191 bp, from 930363 to 930553) ( position: 5 to 54 )&Oligo status:uniqueness filter failed for at least one oligo in intergenic region&-&Well:13K16...	0.0302026	0.196198	10.5195	8
Sm_intergen_4845	-&S._meliloti_chromosome_ig_1485_rc (6791 bp, from 3214897 to 3208107) ( position: 2827 to 2876 ), rRNA operon&Oligo status:uniqueness filter failed for at least one oligo in intergenic region&-&Well:24G4...	0.041667	0.195825	15.1524	8
Sm_intergen_4083	-&S._meliloti_chromosome_ig_1258 (172 bp, from 2689117 to 2689288) ( position: 94 to 143 )&Oligo status:all filters passed&-&Well:21M4...	0.0222155	0.195497	8.88655	8
SMc02564	-&CONSERVED HYPOTHETICAL PROTEIN&Oligo status:all filters passed&-&Well:30E24...	0.0286262	0.195331	14.3581	8
SMc00258	-&HYPOTHETICAL SIGNAL PEPTIDE PROTEIN&Oligo status:all filters passed&-&Well:36E14...	0.0289982	0.194438	8.25226	8
Sm_intergen_4342	-&S._meliloti_chromosome_ig_1321 (306 bp, from 2867621 to 2867926) ( position: 156 to 205 )&Oligo status:all filters passed&-&Well:21P20...	0.0444262	0.194331	9.86647	8
Sm_intergen_4440	-&S._meliloti_chromosome_ig_1355 (132 bp, from 2930240 to 2930371) ( position: 1 to 50 )&Oligo status:all filters passed&-&Well:22B3...	0.0399171	0.194054	10.3189	8
SMb20212	-&CONSERVED HYPOTHETICAL PROTEIN&Oligo status:all filters passed&-&Well:7F06...	0.0423313	0.193724	11.0799	8
Sm_intergen_5148	-&S._meliloti_chromosome_ig_1566_rc (1594 bp, from 3383404 to 3381811) ( position: 328 to 377 )&Oligo status:all filters passed&-&Well:24F23...	0.0188617	0.192248	8.84596	8
Sm_intergen_3135	-&pSymB_ig_554_rc (236 bp, from 1529225 to 1528990) ( position: 83 to 132 )&Oligo status:all filters passed&-&Well:16O4...	0.00310028	0.192038	8.07619	8
Sm_intergen_1882	-&pSymB_ig_136 (395 bp, from 399586 to 399980) ( position: 228 to 277 )&Oligo status:all filters passed&-&Well:10J22...	0.0013486	0.191739	8.63502	8
SMa1364	-&putative ABC transporter, periplasmic solute-binding protein&Oligo status:all filters passed&-&Well:3B05...	0.0154929	0.190831	10.7909	8
Sm_intergen_5206	-&S._meliloti_chromosome_ig_1576 (891 bp, from 3408230 to 3409120) ( position: 362 to 411 )&Oligo status:uniqueness filter failed for at least one oligo in intergenic region&-&Well:25P2...	0.0368282	0.189955	8.34936	8
SMb21144	-&putative choline uptake ABC transporter periplasmic solute-binding protein precursor&Oligo status:all filters passed&-&Well:11L18...	0.0258796	0.188832	11.2095	8
SMc04010	-&HYPOTHETICAL PROTEIN&Oligo status:all filters passed&-&Well:34E22...	0.0421963	0.188246	10.6571	8
SMb20400	-&HYPOTHETICAL PROTEIN&Oligo status:all filters passed&-&Well:9A19...	0.00538061	0.187065	11.9949	8
Sm_intergen_1948	-&pSymB_ig_164 (250 bp, from 479467 to 479716) ( position: 100 to 149 )&Oligo status:all filters passed&-&Well:12L2...	0.0236145	0.185253	8.33842	8
SMc02140	phoB&PHOSPHATE REGULON TRANSCRIPTIONAL REGULATORY PROTEIN&Oligo status:all filters passed&-&Well:28M24...	0.00302425	0.185232	8.90861	8
SMc02729	-&HYPOTHETICAL TRANSMEMBRANE PROTEIN&Oligo status:all filters passed&-&Well:30N02...	0.0149501	0.184502	8.58059	8
Sm_intergen_1960	-&pSymB_ig_168 (341 bp, from 488483 to 488823) ( position: 100 to 149 )&Oligo status:all filters passed&-&Well:12H3...	0.0183641	0.182206	9.55832	8
Sm_intergen_3051	-&pSymB_ig_521 (528 bp, from 1450055 to 1450582) ( position: 426 to 475 )&Oligo status:all filters passed&-&Well:15K23...	0.0152888	0.182191	12.1462	8
Sm_intergen_7520	-&S._meliloti_chromosome_ig_799_rc (311 bp, from 1763892 to 1763582) ( position: 3 to 52 )&Oligo status:all filters passed&-&Well:37J3...	0.0327825	0.181437	10.0079	8
Sm_intergen_3868	-&S._meliloti_chromosome_ig_1174 (145 bp, from 2521207 to 2521351) ( position: 30 to 79 )&Oligo status:all filters passed&-&Well:19F15...	0.0122859	0.180525	8.21897	8
Sm_intergen_4463	-&S._meliloti_chromosome_ig_1364_rc (267 bp, from 2947617 to 2947351) ( position: 121 to 170 )&Oligo status:all filters passed&-&Well:22I4...	0.0366786	0.179906	9.09918	8
Sm_intergen_6103	-&S._meliloti_chromosome_ig_35 (7090 bp, from 81030 to 88119) ( position: 6635 to 6684 ), rRNA operon&Oligo status:uniqueness filter failed for at least one oligo in intergenic region&-&Well:29A11...	0.027829	0.179395	12.4489	8
SMc01444	thyA&PROBABLE THYMIDYLATE SYNTHASE PROTEIN&Oligo status:all filters passed&-&Well:26A15...	0.0351085	0.178378	10.0664	8
Sm_intergen_6238	-&S._meliloti_chromosome_ig_375_rc (138 bp, from 845337 to 845200) ( position: 49 to 98 )&Oligo status:all filters passed&-&Well:29H19...	0.0210624	0.178202	8.22488	8
Sm_intergen_5380	-&S._meliloti_chromosome_ig_1621 (127 bp, from 3506863 to 3506989) ( position: 73 to 122 )&Oligo status:all filters passed&-&Well:25N13...	0.0130723	0.178032	8.82067	8
SMc04190	-&CONSERVED HYPOTHETICAL SIGNAL PEPTIDE PROTEIN&Oligo status:all filters passed&-&Well:34L20...	0.0431234	0.177773	8.73294	8
SMc02135	apaG&CONSERVED HYPOTHETICAL PROTEIN&Oligo status:all filters passed&-&Well:28M14...	0.0142068	0.177724	9.48072	8
Sm_intergen_5779	-&S._meliloti_chromosome_ig_252 (112 bp, from 572272 to 572383) ( position: 1 to 50 )&Oligo status:all filters passed&-&Well:27M14...	0.0279937	0.177044	10.7454	8
Sm_intergen_3474	-&S._meliloti_chromosome_ig_1032_rc (172 bp, from 2236802 to 2236631) ( position: 119 to 168 )&Oligo status:all filters passed&-&Well:18L14...	0.0193674	0.176852	10.733	8
Sm_intergen_6563	-&S._meliloti_chromosome_ig_50_rc (720 bp, from 147807 to 147088) ( position: 553 to 602 )&Oligo status:uniqueness filter failed for at least one oligo in intergenic region&-&Well:31M15...	0.0183778	0.176241	9.17169	8
Sm_intergen_5799	-&S._meliloti_chromosome_ig_26 (615 bp, from 55915 to 56529) ( position: 494 to 543 )&Oligo status:uniqueness filter failed for at least one oligo in intergenic region&-&Well:27A16...	0.0124287	0.175403	12.4861	8
SMc02229	-&PUTATIVE ACYL-COA DEHYDROGENASE PROTEIN&Oligo status:all filters passed&-&Well:28J04...	0.0350973	0.175319	8.79433	8
Sm_intergen_7902	-&S._meliloti_chromosome_ig_936_rc (216 bp, from 2055780 to 2055565) ( position: 97 to 146 )&Oligo status:all filters passed&-&Well:39H3...	0.0309766	0.173244	10.4092	8
SMb21639	paaB&putative phenylacetic acid degradation protein&Oligo status:all filters passed&-&Well:14F21...	0.0141155	0.172947	12.5773	8
SMa2219	-&probable decarboxylase&Oligo status:all filters passed&-&Well:5F09...	0.0318003	0.171452	9.94496	8
Sm_intergen_3501	-&S._meliloti_chromosome_ig_1044 (332 bp, from 2252848 to 2253179) ( position: 135 to 184 )&Oligo status:all filters passed&-&Well:18G16...	0.0148816	0.171195	8.47367	8
Sm_intergen_224	-&pSymA_ig_158 (441 bp, from 342152 to 342592) ( position: 212 to 261 )&Oligo status:all filters passed&-&Well:2P14...	0.0434573	0.17048	13.476	8
SMc00191	-&HYPOTHETICAL PROTEIN&Oligo status:all filters passed&-&Well:17I18...	0.0209276	0.167364	12.246	8
Sm_intergen_2316	-&pSymB_ig_255 (2794 bp, from 669843 to 672636) ( position: 2151 to 2200 )&Oligo status:all filters passed&-&Well:13L1...	0.0416906	0.16668	8.2426	8
SMc02177	-&HYPOTHETICAL PROTEIN&Oligo status:all filters passed&-&Well:28F02...	0.0425845	0.166296	8.31539	8
Sm_intergen_135	-&pSymA_ig_130_rc (1185 bp, from 287402 to 286218) ( position: 296 to 345 )&Oligo status:all filters passed&-&Well:2G9...	0.0335591	0.165722	11.0486	8
Sm_intergen_2770	-&pSymB_ig_418 (106 bp, from 1192257 to 1192362) ( position: 52 to 101 )&Oligo status:all filters passed&-&Well:15B6...	0.0170998	0.163213	8.82866	8
SMc01909	-&CONSERVED HYPOTHETICAL PROTEIN&Oligo status:all filters passed&-&Well:26P01...	0.0157185	0.161901	14.1738	8
SMc00157	-&CONSERVED HYPOTHETICAL PROTEIN&Oligo status:all filters passed&-&Well:17E04...	0.049654	0.160288	10.0894	8
Sm_intergen_963	-&pSymA_ig_399 (219 bp, from 904767 to 904985) ( position: 90 to 139 )&Oligo status:all filters passed&-&Well:6C13...	0.0125355	0.159751	9.36698	8
Sm_intergen_7456	-&S._meliloti_chromosome_ig_779_rc (493 bp, from 1728411 to 1727919) ( position: 100 to 149 )&Oligo status:all filters passed&-&Well:35J23...	0.00740057	0.159205	10.841	8
SMc00820	-&PUTATIVE TRANSCRIPTIONAL REGULATOR PROTEIN&Oligo status:all filters passed&-&Well:20N14...	0.0157598	0.15891	10.2053	8
Sm_intergen_7298	-&S._meliloti_chromosome_ig_735 (278 bp, from 1629395 to 1629672) ( position: 104 to 153 )&Oligo status:all filters passed&-&Well:35L13...	0.00245782	0.157106	12.3969	8
Sm_intergen_6175	-&S._meliloti_chromosome_ig_354_rc (154 bp, from 813351 to 813198) ( position: 0 to 49 )&Oligo status:all filters passed&-&Well:29I15...	0.0208963	0.15706	8.70542	8
Sm_intergen_651	-&pSymA_ig_286 (181 bp, from 593440 to 593620) ( position: 1 to 50 )&Oligo status:all filters passed&-&Well:4K17...	0.0464258	0.154833	8.23173	8
SMc02222	-&HYPOTHETICAL TRANSMEMBRANE PROTEIN&Oligo status:all filters passed&-&Well:28H14...	0.0022962	0.153921	11.7422	8
SMc00984	-&CONSERVED HYPOTHETICAL PROTEIN&Oligo status:all filters passed&-&Well:23C19...	0.0201796	0.153819	8.22364	8
Sm_intergen_7728	-&S._meliloti_chromosome_ig_87_rc (259 bp, from 243152 to 242894) ( position: 61 to 110 )&Oligo status:all filters passed&-&Well:37J16...	0.0196799	0.153748	8.80412	8
Sm_intergen_4165	-&S._meliloti_chromosome_ig_1292 (284 bp, from 2804012 to 2804295) ( position: 134 to 183 )&Oligo status:all filters passed&-&Well:21O9...	0.0209095	0.153314	8.59527	8
SMb20174	-&putative cytochrome c protein&Oligo status:all filters passed&-&Well:7O18...	0.0435998	0.152889	8.62737	8
SMb20024	-&CONSERVED HYPOTHETICAL PROTEIN&Oligo status:all filters passed&-&Well:7I01...	0.0341603	0.150417	9.11874	8
SMc00605	-&HYPOTHETICAL ZINC FINGER DOMAIN C2H2 TYPE PROTEIN&Oligo status:all filters passed&-&Well:20O21...	0.0388174	0.149754	12.2807	8
Sm_intergen_4760	-&S._meliloti_chromosome_ig_1478 (440 bp, from 3187935 to 3188374) ( position: 381 to 430 )&Oligo status:all filters passed&-&Well:22B23...	0.0038642	0.149659	11.0574	8
SMc00916	gst11&PUTATIVE GLUTATHIONE S-TRANSFERASE PROTEIN&Oligo status:all filters passed&-&Well:20J13...	0.0092926	0.149126	10.669	8
SMc04162	-&PUTATIVE TRANSCRIPTION REGULATOR PROTEIN&Oligo status:all filters passed&-&Well:34H16...	0.0242981	0.149071	10.9765	8
Sm_intergen_1532	-&pSymA_ig_55 (320 bp, from 127766 to 128085) ( position: 132 to 181 )&Oligo status:all filters passed&-&Well:8L24...	0.0295452	0.148094	8.52367	8
Sm_intergen_74	-&pSymA_ig_114 (913 bp, from 242243 to 243155) ( position: 665 to 714 )&Oligo status:uniqueness filter failed for at least one oligo in intergenic region&-&Well:2J5...	0.000638889	0.148055	9.24585	8
SMc01213	-&HYPOTHETICAL TRANSMEMBRANE PROTEIN&Oligo status:all filters passed&-&Well:23D20...	0.00423876	0.144116	11.7558	8
SMa1948	-&Hypothetical protein&Oligo status:all filters passed&-&Well:5B14...	0.0356205	0.144101	9.24796	8
SMa2041	-&probable oxidoreductase&Oligo status:all filters passed&-&Well:5J12...	0.0138761	0.144062	10.0896	8
SMc01006	-&CONSERVED HYPOTHETICAL PROTEIN&Oligo status:all filters passed&-&Well:23G15...	0.019355	0.143067	9.09463	8
SMc02704	-&HYPOTHETICAL PROTEIN&Oligo status:all filters passed&-&Well:30J04...	0.0451926	0.142895	9.16398	8
SMc01347	-&CONSERVED HYPOTHETICAL PROTEIN&Oligo status:all filters passed&-&Well:23H01...	0.0108878	0.14233	10.161	8
Sm_intergen_6285	-&S._meliloti_chromosome_ig_395_rc (110 bp, from 887162 to 887053) ( position: 5 to 54 )&Oligo status:uniqueness filter failed for at least one oligo in intergenic region&-&Well:29G22...	0.0361008	0.140647	9.68074	8
SMb20484	-&putative ABC transporter periplasmic sugar-binding protein&Oligo status:all filters passed&-&Well:9O01...	0.0476372	0.138983	10.0349	8
SMb20942	exoB&UDP glucose 4-epimerase protein&Oligo status:all filters passed&-&Well:11M07...	0.0296689	0.137626	10.2605	8
Sm_intergen_800	-&pSymA_ig_339_rc (273 bp, from 731313 to 731041) ( position: 100 to 149 )&Oligo status:all filters passed&-&Well:6P2...	0.0339341	0.137609	12.9506	8
Sm_intergen_842	-&pSymA_ig_356_rc (398 bp, from 777118 to 776721) ( position: 206 to 255 )&Oligo status:all filters passed&-&Well:6J5...	0.0145988	0.135544	9.07766	8
smnegc6	&Oligo status:-&Randomly generated negative control&Well:38D01...	0.0120352	0.13533	8.21378	128
smnegc7	&Oligo status:-&Randomly generated negative control&Well:38D03...	3.31256e-06	0.133728	11.0515	128
SMb21031	-&hypothetical membrane-anchored protein&Oligo status:all filters passed&-&Well:11K06...	0.0203494	0.132804	9.7761	8
SMc02867	-&PUTATIVE MULTIDRUG-EFFLUX SYSTEM TRANSMEMBRANE PROTEIN&Oligo status:all filters passed&-&Well:30P07...	0.0179154	0.132288	9.88204	8
Sm_intergen_4417	-&S._meliloti_chromosome_ig_1345_rc (410 bp, from 2920299 to 2919890) ( position: 354 to 403 )&Oligo status:all filters passed&-&Well:22K1...	0.0431756	0.131132	8.87691	8
SMa0548	-&conserved hypothetical protein&Oligo status:all filters passed&-&Well:1N12...	0.0322354	0.130243	12.6301	8
SMc00019	-&CONSERVED HYPOTHETICAL PROTEIN&Oligo status:all filters passed&-&Well:14P19...	0.000103729	0.130014	10.0241	8
SMc02799	gidB&PROBABLE GLUCOSE INHIBITED DIVISION PROTEIN B&Oligo status:all filters passed&-&Well:30F17...	0.0310476	0.129385	9.19846	8
Sm_intergen_2802	-&pSymB_ig_430 (246 bp, from 1230830 to 1231075) ( position: 90 to 139 )&Oligo status:all filters passed&-&Well:15B8...	0.0278424	0.128921	8.94773	8
Sm_intergen_4827	-&S._meliloti_chromosome_ig_1485 (6791 bp, from 3208107 to 3214897) ( position: 6687 to 6736 ), rRNA operon&Oligo status:uniqueness filter failed for at least one oligo in intergenic region&-&Well:24E3...	0.0303441	0.127073	11.7153	8
SMc02020	-&PUTATIVE ATP BINDING ABC TRANSPORTER PROTEIN&Oligo status:all filters passed&-&Well:28K23...	0.00745631	0.125902	10.8007	8
Sm_intergen_3367	-&pSymB_ig_99_rc (179 bp, from 279463 to 279285) ( position: 89 to 138 )&Oligo status:all filters passed&-&Well:18A8...	0.0404072	0.12531	8.84414	8
SMc04201	-&PUTATIVE SIGNAL PEPTIDE PROTEIN&Oligo status:all filters passed&-&Well:34N12...	0.0341778	0.122491	8.05984	8
SMc01404	-&PUTATIVE ASPARTATE RACEMASE PROTEIN&Oligo status:all filters passed&-&Well:23L11...	0.0316659	0.121511	9.09644	8
Sm_intergen_4852	-&S._meliloti_chromosome_ig_1485_rc (6791 bp, from 3214897 to 3208107) ( position: 3612 to 3661 ), rRNA operon&Oligo status:uniqueness filter failed for at least one oligo in intergenic region&-&Well:24N4...	0.0418084	0.120755	15.4126	8
Sm_intergen_1570	-&pSymA_ig_562 (959 bp, from 1262337 to 1263295) ( position: 909 to 958 )&Oligo status:uniqueness filter failed for at least one oligo in intergenic region&-&Well:10B3...	0.00552329	0.116173	10.6318	8
Sm_intergen_5010	-&S._meliloti_chromosome_ig_1535_rc (221 bp, from 3330083 to 3329863) ( position: 73 to 122 )&Oligo status:all filters passed&-&Well:24L14...	0.0196797	0.114888	9.44585	8
SMb20131	-&putative oxidoreductase protein&Oligo status:all filters passed&-&Well:7I06...	0.0171692	0.113496	9.3004	8
Sm_intergen_5392	-&S._meliloti_chromosome_ig_1627 (386 bp, from 3522081 to 3522466) ( position: 198 to 247 )&Oligo status:all filters passed&-&Well:25J14...	0.0381474	0.112264	8.71782	8
Sm_intergen_5069	-&S._meliloti_chromosome_ig_1554_rc (942 bp, from 3364892 to 3363951) ( position: 113 to 162 )&Oligo status:all filters passed&-&Well:24G18...	0.0277237	0.112094	8.39266	8
Sm_intergen_5743	-&S._meliloti_chromosome_ig_244 (2407 bp, from 543309 to 545715) ( position: 281 to 330 )&Oligo status:all filters passed&-&Well:27I12...	0.00799683	0.11131	8.24665	8
Sm_intergen_5945	-&S._meliloti_chromosome_ig_313 (1067 bp, from 710523 to 711589) ( position: 101 to 150 )&Oligo status:uniqueness filter failed for at least one oligo in intergenic region&-&Well:29C1...	0.0226015	0.110248	9.57649	8
Sm_intergen_524	-&pSymA_ig_242_rc (621 bp, from 511712 to 511092) ( position: 509 to 558 )&Oligo status:all filters passed&-&Well:4L9...	0.0172971	0.106098	9.84696	8
SMc01106	-&PROBABLE SMALL HEAT SHOCK PROTEIN&Oligo status:all filters passed&-&Well:23C02...	0.00867665	0.105818	11.9147	136
SMb21043	-&putative exported protein&Oligo status:all filters passed&-&Well:11M04...	0.0425937	0.105233	8.91188	7
Sm_intergen_5219	-&S._meliloti_chromosome_ig_1579 (1106 bp, from 3412512 to 3413617) ( position: 346 to 395 )&Oligo status:all filters passed&-&Well:25M3...	0.0253779	0.105149	8.7648	8
Sm_intergen_7234	-&S._meliloti_chromosome_ig_711_rc (1354 bp, from 1581612 to 1580259) ( position: 936 to 985 )&Oligo status:uniqueness filter failed for at least one oligo in intergenic region&-&Well:35L9...	0.00486922	0.102783	9.59824	8
Sm_intergen_2964	-&pSymB_ig_487_rc (310 bp, from 1370059 to 1369750) ( position: 101 to 150 )&Oligo status:all filters passed&-&Well:15D18...	0.0302637	0.102622	12.0014	8
SMc01856	-&PUTATIVE SARCOSINE OXIDASE PROTEIN&Oligo status:all filters passed&-&Well:26J01...	0.00676263	0.101974	8.76634	8
SMc01138	-&PROBABLE ABC TRANSPORTER ATP-BINDING PROTEIN&Oligo status:all filters passed&-&Well:23G18...	0.0177291	0.10045	11.6408	8
SMa1082	-&Hypothetical protein&Oligo status:all filters passed&-&Well:3G12...	0.0430663	0.0974697	8.72485	8
Sm_intergen_1578	-&pSymA_ig_563_rc (653 bp, from 1266251 to 1265599) ( position: 410 to 459 )&Oligo status:all filters passed&-&Well:10J3...	0.035554	0.0971321	8.67142	8
SMc03859	rpsP&PROBABLE 30S RIBOSOMAL PROTEIN S16&Oligo status:all filters passed&-&Well:34C17...	0.0118789	0.0960107	11.3369	136
Sm_intergen_2659	-&pSymB_ig_373_rc (144 bp, from 1059672 to 1059529) ( position: 58 to 107 )&Oligo status:all filters passed&-&Well:13C23...	0.0200037	0.0954493	9.4655	8
Sm_intergen_4446	-&S._meliloti_chromosome_ig_1358 (139 bp, from 2938081 to 2938219) ( position: 82 to 131 )&Oligo status:all filters passed&-&Well:22H3...	0.0130994	0.0942454	8.68125	8
Sm_intergen_5051	-&S._meliloti_chromosome_ig_1552 (532 bp, from 3359788 to 3360319) ( position: 149 to 198 )&Oligo status:all filters passed&-&Well:24E17...	0.00629691	0.0937851	9.1959	8
SMc00363	rpmI&PROBABLE 50S RIBOSOMAL PROTEIN L35&Oligo status:all filters passed&-&Well:17N16...	0.0302729	0.087631	12.4863	136
SMb21665	-&hypothetical membrane-anchored protein&Oligo status:all filters passed&-&Well:14J15...	0.0364825	0.0833447	12.6701	8
SMc02615	-&HYPOTHETICAL SIGNAL PEPTIDE PROTEIN&Oligo status:all filters passed&-&Well:30O06...	0.00509941	0.0832954	12.4343	8
Sm_intergen_2847	-&pSymB_ig_45_rc (125 bp, from 118703 to 118579) ( position: 11 to 60 )&Oligo status:all filters passed&-&Well:15O10...	0.0187344	0.0787257	8.77122	8
Sm_intergen_3514	-&S._meliloti_chromosome_ig_1049_rc (587 bp, from 2271369 to 2270783) ( position: 384 to 433 )&Oligo status:all filters passed&-&Well:18D17...	0.0454251	0.0768048	11.2717	8
Sm_intergen_3015	-&pSymB_ig_507_rc (262 bp, from 1414210 to 1413949) ( position: 100 to 149 )&Oligo status:all filters passed&-&Well:15G21...	0.033899	0.0762566	12.0987	8
Sm_intergen_31	-&pSymA_ig_103 (295 bp, from 231133 to 231427) ( position: 224 to 273 )&Oligo status:all filters passed&-&Well:2O2...	0.00224913	0.0731143	10.1519	8
spotting buffer	-&-&Oligo status:-&spotting buffer&Well:11A01...	4.73994e-09	0.0272018	10.1883	2607
Sm_intergen_4649	-&S._meliloti_chromosome_ig_1433_rc (189 bp, from 3085645 to 3085457) ( position: 79 to 128 )&Oligo status:all filters passed&-&Well:22C16...	0.0193792	-0.0620491	11.0617	8
SMa2055	-&hypothetical protein&Oligo status:all filters passed&-&Well:5J20...	0.0479509	-0.0640541	9.60383	8
Sm_intergen_4713	-&S._meliloti_chromosome_ig_1461_rc (171 bp, from 3136217 to 3136047) ( position: 44 to 93 )&Oligo status:all filters passed&-&Well:22C20...	0.022456	-0.0687935	11.431	8
Sm_intergen_3134	-&pSymB_ig_554 (236 bp, from 1528990 to 1529225) ( position: 103 to 152 )&Oligo status:all filters passed&-&Well:16N4...	0.0249206	-0.0707354	9.90067	8
Sm_intergen_2609	-&pSymB_ig_353_rc (150 bp, from 1000632 to 1000483) ( position: 16 to 65 )&Oligo status:all filters passed&-&Well:13A20...	0.0371175	-0.0811256	8.50326	8
SMc02035	-&PUTATIVE OXIDOREDUCTASE PROTEIN&Oligo status:all filters passed&-&Well:28O05...	0.0221769	-0.0822535	9.22046	8
Sm_intergen_3985	-&S._meliloti_chromosome_ig_1220 (181 bp, from 2610174 to 2610354) ( position: 113 to 162 )&Oligo status:all filters passed&-&Well:19K22...	0.0433714	-0.0825123	10.5553	8
Sm_intergen_6255	-&S._meliloti_chromosome_ig_383 (287 bp, from 859388 to 859674) ( position: 83 to 132 )&Oligo status:all filters passed&-&Well:29I20...	0.0192059	-0.0837657	9.25794	8
Sm_intergen_5927	-&S._meliloti_chromosome_ig_306 (281 bp, from 688490 to 688770) ( position: 139 to 188 )&Oligo status:all filters passed&-&Well:27A24...	0.0245252	-0.0855109	10.3816	8
Sm_intergen_4925	-&S._meliloti_chromosome_ig_15_rc (151 bp, from 25859 to 25709) ( position: 39 to 88 )&Oligo status:all filters passed&-&Well:24G9...	0.0229271	-0.0861519	10.0565	8
SMc01703	-&CONSERVED HYPOTHETICAL PROTEIN&Oligo status:all filters passed&-&Well:26B22...	0.0137489	-0.0864418	12.2476	8
SMa1005	-&hypothetical protein&Oligo status:all filters passed&-&Well:3A18...	0.0240308	-0.0868509	8.86318	8
SMc01497	smoF&PROBABLE SORBITOL/MANNITOL TRANSPORT INNER MEMBRANE TRANSMEMBRANE PROTEIN&Oligo status:all filters passed&-&Well:26G13...	0.0405635	-0.0882454	8.86088	8
SMc00197	-&HYPOTHETICAL TRANSMEMBRANE PROTEIN&Oligo status:all filters passed&-&Well:17K04...	0.0409985	-0.0900638	8.62827	8
SMc02074	-&CONSERVED HYPOTHETICAL PROTEIN&Oligo status:all filters passed&-&Well:28E06...	0.0443519	-0.0915868	9.0329	8
SMa0674	-&hypothetical protein&Oligo status:all filters passed&-&Well:1H09...	6.91081e-05	-0.0922388	9.21466	8
Sm_intergen_4333	-&S._meliloti_chromosome_ig_1318 (426 bp, from 2863312 to 2863737) ( position: 350 to 399 )&Oligo status:all filters passed&-&Well:21G20...	0.0300845	-0.0927448	12.3944	8
Sm_intergen_3693	-&S._meliloti_chromosome_ig_1110_rc (172 bp, from 2393081 to 2392910) ( position: 99 to 148 )&Oligo status:all filters passed&-&Well:19G4...	0.0314459	-0.0928178	8.12401	8
Sm_intergen_7525	-&S._meliloti_chromosome_ig_80_rc (478 bp, from 224764 to 224287) ( position: 222 to 271 )&Oligo status:all filters passed&-&Well:37O3...	0.0129099	-0.0946442	12.2581	8
SMb21339	-&putative protein, similar to N-terminal part of the catalytic subunit of an oxidoreductase like aldehyde oxidase or xanthine dehydrogenase&Oligo status:all filters passed&-&Well:14K09...	0.0391328	-0.0957059	13.9866	8
SMb21143	merA2&putative FAD-dependent pyridine nucleotide-disulphide oxidoreductase, similar to mercuric reductases protein&Oligo status:all filters passed&-&Well:11L16...	0.00990082	-0.096215	9.66571	8
SMc02427	hyuE&PUTATIVE HYDANTOIN RACEMASE PROTEIN&Oligo status:all filters passed&-&Well:30C19...	0.036782	-0.101286	10.9516	8
Sm_intergen_3605	-&S._meliloti_chromosome_ig_108 (286 bp, from 286693 to 286978) ( position: 134 to 183 )&Oligo status:all filters passed&-&Well:18O22...	0.005335	-0.101678	11.8279	8
SMb20548	-&HYPOTHETICAL PROTEIN&Oligo status:all filters passed&-&Well:9G20...	0.0355885	-0.103298	9.08031	8
SMc01555	-&HYPOTHETICAL PROTEIN&Oligo status:all filters passed&-&Well:26O11...	0.00730513	-0.103665	11.3249	8
Sm_intergen_1807	-&pSymB_ig_105_rc (313 bp, from 300703 to 300391) ( position: 143 to 192 )&Oligo status:all filters passed&-&Well:10O17...	0.0494108	-0.104865	8.6341	8
Sm_intergen_2815	-&pSymB_ig_436_rc (249 bp, from 1242315 to 1242067) ( position: 93 to 142 )&Oligo status:all filters passed&-&Well:15O8...	0.0221806	-0.105421	8.80492	8
SMc00647	rluD&PUTATIVE RIBOSOMAL LARGE SUBUNIT PSEUDOURIDINE SYNTHASE PROTEIN&Oligo status:all filters passed&-&Well:20E06...	0.0272214	-0.106146	10.4365	8
Sm_intergen_3910	-&S._meliloti_chromosome_ig_1191 (232 bp, from 2544345 to 2544576) ( position: 90 to 139 )&Oligo status:all filters passed&-&Well:19P17...	0.0431578	-0.106831	8.13198	8
SMc01826	-&PUTATIVE PERMEASE ABC TRANSPORTER PROTEIN&Oligo status:all filters passed&-&Well:26D21...	0.0413553	-0.106891	10.8515	8
Sm_intergen_3649	-&S._meliloti_chromosome_ig_1094_rc (139 bp, from 2362503 to 2362365) ( position: 0 to 49 )&Oligo status:all filters passed&-&Well:19K1...	0.0290144	-0.107809	11.9335	8
Sm_intergen_4193	-&S._meliloti_chromosome_ig_1293 (6914 bp, from 2805257 to 2812170) ( position: 3888 to 3937 ), rRNA operon&Oligo status:uniqueness filter failed for at least one oligo in intergenic region&-&Well:21K11...	0.0219976	-0.108202	8.61908	8
SMc01879	-&CONSERVED HYPOTHETICAL PROTEIN&Oligo status:all filters passed&-&Well:26L21...	0.0325197	-0.108652	10.7409	8
SMc00590	-&PUTATIVE ABC TRANSPORTER ATP-BINDING PROTEIN&Oligo status:all filters passed&-&Well:20M15...	0.0395127	-0.108926	9.22085	8
Sm_intergen_4585	-&S._meliloti_chromosome_ig_141_rc (210 bp, from 339573 to 339364) ( position: 61 to 110 )&Oligo status:uniqueness filter failed for at least one oligo in intergenic region&-&Well:22C12...	0.02687	-0.109603	13.4627	8
SMb20409	-&putative hydroxybutyrate dehydrogenase protein&Oligo status:all filters passed&-&Well:9C11...	0.0156614	-0.110616	8.57457	8
SMa1945	-&Hypothetical protein&Oligo status:all filters passed&-&Well:5B12...	0.0356893	-0.113102	8.63474	8
SMa1288	-&Conserved hypothetical protein&Oligo status:all filters passed&-&Well:3J06...	0.0300609	-0.115601	9.02011	8
SMb20594	amcY&putative amicyanin precursor protein&Oligo status:all filters passed&-&Well:9O04...	0.0212662	-0.115888	13.9147	8
Sm_intergen_3936	-&S._meliloti_chromosome_ig_1201 (102 bp, from 2566681 to 2566782) ( position: 10 to 59 )&Oligo status:all filters passed&-&Well:19J19...	0.0126974	-0.116261	8.01435	8
Sm_intergen_7754	-&S._meliloti_chromosome_ig_881 (294 bp, from 1943281 to 1943574) ( position: 136 to 185 )&Oligo status:all filters passed&-&Well:37D18...	0.0438927	-0.116662	9.54761	8
Sm_intergen_4896	-&S._meliloti_chromosome_ig_1490 (658 bp, from 3231945 to 3232602) ( position: 152 to 201 )&Oligo status:all filters passed&-&Well:24J7...	0.00808152	-0.118939	9.08251	8
Sm_intergen_3976	-&S._meliloti_chromosome_ig_1216_rc (185 bp, from 2599454 to 2599270) ( position: 86 to 135 )&Oligo status:all filters passed&-&Well:19B22...	0.0420798	-0.119714	9.27952	8
Sm_intergen_4660	-&S._meliloti_chromosome_ig_1439 (223 bp, from 3094868 to 3095090) ( position: 75 to 124 )&Oligo status:all filters passed&-&Well:22N16...	0.0340646	-0.119774	10.2157	8
SMc02450	argJ&PROBABLE GLUTAMATE N-ACETYLTRANSFERASE-ORNITHINE ACETYLTRANSFERASE PROTEIN&Oligo status:all filters passed&-&Well:30G13...	0.00248587	-0.120521	11.256	8
SMb21083	-&hypothetical protein encoded by ORF1 of ISRm14, IS66 family&Oligo status:uniqueness filter failed&-&Well:38C01...	0.0351847	-0.121582	10.1237	8
SMc01771	-&CONSERVED HYPOTHETICAL PROTEIN&Oligo status:all filters passed&-&Well:26L10...	0.039513	-0.122113	8.17512	8
SMa2034	-&Hypothetical protein&Oligo status:all filters passed&-&Well:5J08...	0.0102274	-0.122464	8.42016	8
SMc01124	glnD&PROBABLE PROTEIN-PII URIDYLYLTRANSFERASE&Oligo status:all filters passed&-&Well:23E14...	0.0227434	-0.122801	8.69109	8
SMc02421	-&PUTATIVE HYDROLASE PROTEIN&Oligo status:all filters passed&-&Well:30C07...	0.0478529	-0.123868	10.5944	8
Sm_intergen_3729	-&S._meliloti_chromosome_ig_1124 (173 bp, from 2430359 to 2430531) ( position: 114 to 163 )&Oligo status:all filters passed&-&Well:19K6...	0.00954001	-0.123905	9.49637	8
Sm_intergen_1706	-&pSymA_ig_70_rc (276 bp, from 161616 to 161341) ( position: 75 to 124 )&Oligo status:all filters passed&-&Well:10J11...	0.00362675	-0.126611	9.98955	8
Sm_intergen_3142	-&pSymB_ig_557_rc (461 bp, from 1533876 to 1533416) ( position: 163 to 212 )&Oligo status:uniqueness filter failed for at least one oligo in intergenic region&-&Well:16F5...	0.00198106	-0.127124	9.17386	8
Sm_intergen_3086	-&pSymB_ig_533 (171 bp, from 1484252 to 1484422) ( position: 120 to 169 )&Oligo status:all filters passed&-&Well:16N1...	0.0270246	-0.127297	9.41946	8
SMb21530	ilvB2&putative acetolactate synthase isozyme I large subunit protein&Oligo status:all filters passed&-&Well:14H22...	0.0229048	-0.128765	10.1939	8
SMc01001	-&HYPOTHETICAL TRANSMEMBRANE PROTEIN&Oligo status:all filters passed&-&Well:23G05...	0.0507761	-0.129386	13.1543	8
Sm_intergen_5313	-&S._meliloti_chromosome_ig_1597 (424 bp, from 3465209 to 3465632) ( position: 374 to 423 )&Oligo status:all filters passed&-&Well:25K9...	0.0188745	-0.130149	8.6124	8
Sm_intergen_5639	-&S._meliloti_chromosome_ig_206 (255 bp, from 458886 to 459140) ( position: 200 to 249 )&Oligo status:uniqueness filter failed for at least one oligo in intergenic region&-&Well:27A6...	0.046639	-0.130919	9.81993	8
Sm_intergen_6678	-&S._meliloti_chromosome_ig_541 (184 bp, from 1193427 to 1193610) ( position: 25 to 74 )&Oligo status:all filters passed&-&Well:31P22...	0.0362489	-0.131053	9.09932	8
Sm_intergen_5673	-&S._meliloti_chromosome_ig_22 (381 bp, from 51039 to 51419) ( position: 13 to 62 )&Oligo status:all filters passed&-&Well:27C8...	0.00420769	-0.132258	9.76519	8
SMb20703	-&conserved hypothetical protein&Oligo status:all filters passed&-&Well:9N22...	0.0289593	-0.132563	8.47164	8
Sm_intergen_1654	-&pSymA_ig_589 (875 bp, from 1339000 to 1339874) ( position: 505 to 554 )&Oligo status:uniqueness filter failed for at least one oligo in intergenic region&-&Well:10F8...	0.00650282	-0.132711	11.3376	8
Sm_intergen_3327	-&pSymB_ig_82_rc (553 bp, from 231657 to 231105) ( position: 142 to 191 )&Oligo status:uniqueness filter failed for at least one oligo in intergenic region&-&Well:18I5...	0.0075223	-0.13286	9.17464	8
Sm_intergen_2121	-&pSymB_ig_202 (1625 bp, from 574424 to 576048) ( position: 930 to 979 )&Oligo status:all filters passed&-&Well:12I13...	0.0211289	-0.133195	11.4374	8
Sm_intergen_706	-&pSymA_ig_303_rc (111 bp, from 634156 to 634046) ( position: 56 to 105 )&Oligo status:all filters passed&-&Well:4B21...	0.0317962	-0.135052	9.00297	8
Sm_intergen_5221	-&S._meliloti_chromosome_ig_1579 (1106 bp, from 3412512 to 3413617) ( position: 753 to 802 )&Oligo status:all filters passed&-&Well:25O3...	0.0125561	-0.135548	10.0413	8
SMb21364	-&putative membrane-anchored oxidoreductase, similar to L-sorbosone dehydrogenase protein&Oligo status:all filters passed&-&Well:14O09...	0.0253014	-0.138036	8.70859	8
Sm_intergen_3821	-&S._meliloti_chromosome_ig_1156_rc (613 bp, from 2496744 to 2496132) ( position: 204 to 253 )&Oligo status:all filters passed&-&Well:19G12...	0.0321345	-0.138674	9.30154	8
SMa1548	-&conserved hypothetical protein&Oligo status:all filters passed&-&Well:3P19...	0.0313766	-0.139071	13.4223	8
Sm_intergen_548	-&pSymA_ig_249 (407 bp, from 528744 to 529150) ( position: 350 to 399 )&Oligo status:all filters passed&-&Well:4D11...	0.0354445	-0.139667	9.53887	8
Sm_intergen_1039	-&pSymA_ig_412 (338 bp, from 932189 to 932526) ( position: 149 to 198 )&Oligo status:all filters passed&-&Well:6O17...	0.0463859	-0.139787	8.09472	8
Sm_intergen_2623	-&pSymB_ig_36 (834 bp, from 87380 to 88213) ( position: 269 to 318 )&Oligo status:all filters passed&-&Well:13O20...	0.0450928	-0.141283	8.77309	8
Sm_intergen_3160	-&pSymB_ig_562_rc (227 bp, from 1548979 to 1548753) ( position: 84 to 133 )&Oligo status:uniqueness filter failed for at least one oligo in intergenic region&-&Well:16H6...	0.00078029	-0.141656	8.19892	8
Sm_intergen_4521	-&S._meliloti_chromosome_ig_1386_rc (316 bp, from 2992307 to 2991992) ( position: 100 to 149 )&Oligo status:all filters passed&-&Well:22C8...	0.0319679	-0.142341	8.04036	8
Sm_intergen_2726	-&pSymB_ig_400 (203 bp, from 1139973 to 1140175) ( position: 63 to 112 )&Oligo status:all filters passed&-&Well:15F3...	0.0234576	-0.142856	8.67764	8
Sm_intergen_1116	-&pSymA_ig_438_rc (469 bp, from 983996 to 983528) ( position: 350 to 399 )&Oligo status:all filters passed&-&Well:6L22...	0.00235264	-0.143197	11.1835	8
SMb20633	-&putative sugar uptake ABC transporter permease protein&Oligo status:all filters passed&-&Well:9F10...	0.0179448	-0.14327	11.1071	8
Sm_intergen_5118	-&S._meliloti_chromosome_ig_1563 (526 bp, from 3377081 to 3377606) ( position: 166 to 215 )&Oligo status:all filters passed&-&Well:24H21...	0.0438113	-0.144101	8.41458	8
SMa1995	-&Putative ABC transporter, permease protein&Oligo status:all filters passed&-&Well:5F18...	0.0044084	-0.144238	8.01293	8
Sm_intergen_174	-&pSymA_ig_140_rc (792 bp, from 304557 to 303766) ( position: 469 to 518 )&Oligo status:all filters passed&-&Well:2N11...	0.0345182	-0.145534	8.72322	8
Sm_intergen_4804	-&S._meliloti_chromosome_ig_1485 (6791 bp, from 3208107 to 3214897) ( position: 4024 to 4073 ), rRNA operon&Oligo status:uniqueness filter failed for at least one oligo in intergenic region&-&Well:24N1...	0.0196917	-0.14736	9.81176	8
SMc02437	ptsP&PROBABLE PHOSPHOENOLPYRUVATE PHOSPHOTRANSFERASE PTSP (ENZYME I-NTR) PROTEIN&Oligo status:all filters passed&-&Well:30E13...	0.0232688	-0.14946	10.0621	8
SMc02446	-&CONSERVED HYPOTHETICAL PROTEIN&Oligo status:all filters passed&-&Well:36N12...	0.00156119	-0.149854	9.2318	8
SMc03241	-&CONSERVED HYPOTHETICAL PROTEIN&Oligo status:all filters passed&-&Well:32L24...	0.00814627	-0.150037	12.3807	8
Sm_intergen_1308	-&pSymA_ig_489 (594 bp, from 1097019 to 1097612) ( position: 376 to 425 )&Oligo status:all filters passed&-&Well:8L10...	0.0224564	-0.150182	8.28152	8
Sm_intergen_362	-&pSymA_ig_195 (232 bp, from 411682 to 411913) ( position: 172 to 221 )&Oligo status:all filters passed&-&Well:2J23...	0.00829924	-0.150444	9.39933	8
Sm_intergen_5940	-&S._meliloti_chromosome_ig_311_rc (191 bp, from 696263 to 696073) ( position: 1 to 50 )&Oligo status:all filters passed&-&Well:27N24...	0.0412573	-0.150452	8.7835	8
Sm_intergen_6592	-&S._meliloti_chromosome_ig_51_rc (105 bp, from 154131 to 154027) ( position: 16 to 65 )&Oligo status:uniqueness filter failed for at least one oligo in intergenic region&-&Well:31J17...	0.0124809	-0.15164	8.04049	8
SMb20803	kdsB2&probable 3-deoxy-manno-octulosonate cytidylyltransferase (CMP KDO transferase) protein&Oligo status:all filters passed&-&Well:9H21...	0.0486208	-0.152034	9.75364	8
SMc00708	gloB&PUTATIVE HYDROXYACYLGLUTATHIONE HYDROLASE (GLYOXALASE II) (GLX II) PROTEIN&Oligo status:all filters passed&-&Well:20M24...	0.0242105	-0.15267	9.34781	8
Sm_intergen_7007	-&S._meliloti_chromosome_ig_646 (760 bp, from 1444408 to 1445167) ( position: 701 to 750 )&Oligo status:all filters passed&-&Well:33I19...	0.00751358	-0.153367	12.6774	8
Sm_intergen_2620	-&pSymB_ig_359 (156 bp, from 1018332 to 1018487) ( position: 57 to 106 )&Oligo status:all filters passed&-&Well:13L20...	0.00404862	-0.153445	9.80333	8
SMa0426	-&conserved hypothetical protein&Oligo status:all filters passed&-&Well:1F06...	0.0030743	-0.153553	9.01672	8
SMb20305	TRm2011none2N&probable ISRm2011-2 transposase protein, N-terminal portion&Oligo status:uniqueness filter failed&-&Well:36P01...	0.0469055	-0.153576	10.3063	8
Sm_intergen_1511	-&pSymA_ig_545_rc (1126 bp, from 1221480 to 1220355) ( position: 511 to 560 )&Oligo status:all filters passed&-&Well:8G23...	0.0183868	-0.155259	10.2876	8
Sm_intergen_3577	-&S._meliloti_chromosome_ig_1072 (763 bp, from 2312685 to 2313447) ( position: 712 to 761 )&Oligo status:uniqueness filter failed for at least one oligo in intergenic region&-&Well:18C21...	0.00463696	-0.155575	8.54116	8
Sm_intergen_527	-&pSymA_ig_243 (1009 bp, from 512080 to 513088) ( position: 526 to 575 )&Oligo status:all filters passed&-&Well:4O9...	0.0308515	-0.156355	8.41641	8
Sm_intergen_4431	-&S._meliloti_chromosome_ig_1350_rc (244 bp, from 2923767 to 2923524) ( position: 56 to 105 )&Oligo status:all filters passed&-&Well:22I2...	0.0160685	-0.156728	8.64681	8
Sm_intergen_6127	-&S._meliloti_chromosome_ig_35_rc (7090 bp, from 88119 to 81030) ( position: 2969 to 3018 ), rRNA operon&Oligo status:uniqueness filter failed for at least one oligo in intergenic region&-&Well:29I12...	0.00645691	-0.157326	9.28386	8
Sm_intergen_6169	-&S._meliloti_chromosome_ig_352 (479 bp, from 807009 to 807487) ( position: 354 to 403 )&Oligo status:all filters passed&-&Well:29C15...	0.0180977	-0.157926	9.25114	8
Sm_intergen_5558	-&S._meliloti_chromosome_ig_174 (193 bp, from 397946 to 398138) ( position: 3 to 52 )&Oligo status:all filters passed&-&Well:25P24...	0.0429709	-0.158644	13.1975	8
SMc03198	modC&PUTATIVE MOLYBDENUM TRANSPORT ATP-BINDING ABC TRANSPORTER PROTEIN&Oligo status:all filters passed&-&Well:32H12...	0.0362941	-0.159436	11.7892	8
SMc00330	-&PUTATIVE TRANSMEMBRANE PROTEIN&Oligo status:all filters passed&-&Well:17J02...	0.00221596	-0.159903	9.76513	8
SMc01866	murG&PROBABLE UDP-N-ACETYLGLUCOSAMINE--N-ACETYLMURAMYL-PENTAPEPTIDE PYROPHOSPHORYL-UNDECAPRENOL N-ACETYLGLUCOSAMINE TRANSFERASE PROTEIN&Oligo status:all filters passed&-&Well:26J21...	0.0487847	-0.161187	8.89303	8
Sm_intergen_920	-&pSymA_ig_386_rc (899 bp, from 879859 to 878961) ( position: 330 to 379 )&Oligo status:all filters passed&-&Well:6H10...	0.00684632	-0.161438	9.35223	8
Sm_intergen_6124	-&S._meliloti_chromosome_ig_35_rc (7090 bp, from 88119 to 81030) ( position: 2710 to 2759 ), rRNA operon&Oligo status:uniqueness filter failed for at least one oligo in intergenic region&-&Well:29F12...	0.0445574	-0.16176	9.29583	8
SMc04093	acsA1&PROBABLE ACETYL-COENZYME A SYNTHETASE PROTEIN&Oligo status:all filters passed&-&Well:34O16...	0.012476	-0.162804	10.4882	8
SMc00782	-&HYPOTHETICAL TRANSMEMBRANE PROTEIN&Oligo status:all filters passed&-&Well:20H14...	0.0295752	-0.163895	8.82902	8
Sm_intergen_1566	-&pSymA_ig_562 (959 bp, from 1262337 to 1263295) ( position: 301 to 350 )&Oligo status:uniqueness filter failed for at least one oligo in intergenic region&-&Well:10N2...	0.0144918	-0.163963	10.228	8
SMc01412	-&CONSERVED HYPOTHETICAL PROTEIN&Oligo status:all filters passed&-&Well:23N01...	0.00488629	-0.164231	10.3738	8
SMa2209	-&putative ABC transporter, periplasmic solute-binding protein&Oligo status:all filters passed&-&Well:5D23...	0.0479494	-0.164527	11.6577	8
Sm_intergen_5717	-&S._meliloti_chromosome_ig_236 (191 bp, from 527680 to 527870) ( position: 19 to 68 )&Oligo status:all filters passed&-&Well:27O10...	0.0299667	-0.164809	8.39061	8
SMa2147	-&hypothetical protein&Oligo status:all filters passed&-&Well:5B13...	0.0199174	-0.164902	11.0453	8
Sm_intergen_5884	-&S._meliloti_chromosome_ig_292 (915 bp, from 662370 to 663284) ( position: 533 to 582 )&Oligo status:all filters passed&-&Well:27F21...	0.0213081	-0.165118	9.62405	8
SMc03253	-&PUTATIVE L-PROLINE 3-HYDROXYLASE PROTEIN&Oligo status:all filters passed&-&Well:32N24...	0.0127925	-0.165227	9.20262	8
SMc00085	-&PUTATIVE CYTOCHROME OXIDASE COMPLEX BIOGENESIS FACTOR TRANSMEMBRANE PROTEIN&Oligo status:all filters passed&-&Well:17I19...	0.0373361	-0.166228	8.72203	8
SMc02976	-&PUTATIVE TRANSCRIPTION REGULATOR PROTEIN&Oligo status:all filters passed&-&Well:32G13...	0.0293599	-0.16665	11.7088	8
Sm_intergen_4912	-&S._meliloti_chromosome_ig_1496 (424 bp, from 3242601 to 3243024) ( position: 156 to 205 )&Oligo status:all filters passed&-&Well:24J8...	0.0376239	-0.167494	8.33328	8
SMc02584	actR&TRANSCRIPTION REGULATOR PROTEIN&Oligo status:all filters passed&-&Well:30I16...	0.000250929	-0.168551	10.3564	8
Sm_intergen_3104	-&pSymB_ig_541 (184 bp, from 1502776 to 1502959) ( position: 97 to 146 )&Oligo status:all filters passed&-&Well:16P2...	0.0191331	-0.168714	8.42168	8
Sm_intergen_6576	-&S._meliloti_chromosome_ig_503_rc (213 bp, from 1107235 to 1107023) ( position: 59 to 108 )&Oligo status:all filters passed&-&Well:31J16...	0.0449668	-0.168828	10.1728	8
Sm_intergen_142	-&pSymA_ig_132 (1068 bp, from 288703 to 289770) ( position: 290 to 339 )&Oligo status:uniqueness filter failed for at least one oligo in intergenic region&-&Well:2N9...	0.0159161	-0.169283	8.80882	8
Sm_intergen_51	-&pSymA_ig_108_rc (103 bp, from 236878 to 236776) ( position: 2 to 51 )&Oligo status:uniqueness filter failed for at least one oligo in intergenic region&-&Well:2C4...	0.00947505	-0.17024	13.5983	8
Sm_intergen_3388	-&S._meliloti_chromosome_ig_1001_rc (1991 bp, from 2181031 to 2179041) ( position: 0 to 49 )&Oligo status:all filters passed&-&Well:18F9...	0.0191401	-0.170285	9.00909	8
SMc02423	-&PUTATIVE OLIGOPEPTIDE TRANSPORT ATP-BINDING ABC TRANSPORTER PROTEIN&Oligo status:all filters passed&-&Well:30C11...	0.00188508	-0.170908	9.37325	8
Sm_intergen_1678	-&pSymA_ig_596_rc (157 bp, from 1351362 to 1351206) ( position: 14 to 63 )&Oligo status:all filters passed&-&Well:10N9...	0.037443	-0.17151	9.14578	8
SMc02792	-&CONSERVED HYPOTHETICAL PROTEIN&Oligo status:all filters passed&-&Well:30F03...	0.0475046	-0.171641	9.78899	8
Sm_intergen_2872	-&pSymB_ig_458 (184 bp, from 1295452 to 1295635) ( position: 3 to 52 )&Oligo status:all filters passed&-&Well:15H12...	0.0509003	-0.171851	9.26455	8
SMc02551	cysS&PROBABLE CYSTEINYL-TRNA SYNTHETASE PROTEIN&Oligo status:all filters passed&-&Well:30C24...	0.0252906	-0.172222	10.0421	8
Sm_intergen_6588	-&S._meliloti_chromosome_ig_508_rc (427 bp, from 1124780 to 1124354) ( position: 371 to 420 )&Oligo status:all filters passed&-&Well:31F17...	0.0146029	-0.173463	8.61681	8
Sm_intergen_1126	-&pSymA_ig_441_rc (384 bp, from 994674 to 994291) ( position: 105 to 154 )&Oligo status:all filters passed&-&Well:6F23...	0.0105323	-0.174333	9.115	8
Sm_intergen_1119	-&pSymA_ig_44 (257 bp, from 100708 to 100964) ( position: 85 to 134 )&Oligo status:all filters passed&-&Well:6O22...	0.00941244	-0.174618	9.73484	8
Sm_intergen_264	-&pSymA_ig_168_rc (412 bp, from 355528 to 355117) ( position: 127 to 176 )&Oligo status:all filters passed&-&Well:2H17...	0.0471906	-0.174636	12.9665	8
SMc03026	-&HYPOTHETICAL TRANSMEMBRANE PROTEIN&Oligo status:all filters passed&-&Well:32M21...	0.028915	-0.17485	9.93782	8
SMc01359	aidB&PUTATIVE OXIDOREDUCTASE PROTEIN&Oligo status:all filters passed&-&Well:23H23...	0.0461504	-0.175693	10.3047	8
Sm_intergen_4893	-&S._meliloti_chromosome_ig_1489_rc (179 bp, from 3229305 to 3229127) ( position: 40 to 89 )&Oligo status:uniqueness filter failed for at least one oligo in intergenic region&-&Well:24G7...	0.0247914	-0.177618	10.524	8
Sm_intergen_5444	-&S._meliloti_chromosome_ig_1647 (272 bp, from 3558480 to 3558751) ( position: 98 to 147 )&Oligo status:all filters passed&-&Well:25N17...	0.0252748	-0.178661	9.57933	8
Sm_intergen_3872	-&S._meliloti_chromosome_ig_1176 (219 bp, from 2522753 to 2522971) ( position: 87 to 136 )&Oligo status:all filters passed&-&Well:19J15...	0.0258979	-0.179324	8.01989	8
SMc01315	-&CONSERVED HYPOTHETICAL PROTEIN&Oligo status:all filters passed&-&Well:23B17...	0.0143475	-0.179373	8.32978	8
Sm_intergen_4554	-&S._meliloti_chromosome_ig_140 (293 bp, from 338245 to 338537) ( position: 124 to 173 )&Oligo status:uniqueness filter failed for at least one oligo in intergenic region&-&Well:22D10...	0.0499158	-0.179743	8.16376	8
SMc02502	atpC&PROBABLE ATP SYNTHASE EPSILON CHAIN PROTEIN&Oligo status:all filters passed&-&Well:30O05...	0.0103348	-0.180179	10.749	8
SMc01732	dapD&PROBABLE 2,3,4,5-TETRAHYDROPYRIDINE-2-CARBOXYLATE N-SUCCINYLTRANSFERASE PROTEIN&Oligo status:all filters passed&-&Well:26H08...	0.0421563	-0.18134	12.674	8
SMb21162	-&putative integral membrane transporter protein&Oligo status:all filters passed&-&Well:11P06...	0.0281795	-0.181555	8.61126	8
Sm_intergen_5912	-&S._meliloti_chromosome_ig_301 (159 bp, from 682163 to 682321) ( position: 19 to 68 )&Oligo status:all filters passed&-&Well:27B23...	0.0373458	-0.181572	9.27027	8
Sm_intergen_5755	-&S._meliloti_chromosome_ig_244_rc (2407 bp, from 545715 to 543309) ( position: 979 to 1028 )&Oligo status:all filters passed&-&Well:27E13...	0.024224	-0.182643	10.1602	8
SMc03186	-&PUTATIVE TRANSCRIPTION REGULATOR PROTEIN&Oligo status:all filters passed&-&Well:32F12...	0.0030803	-0.183505	8.55993	8
Sm_intergen_439	-&pSymA_ig_217 (152 bp, from 462060 to 462211) ( position: 77 to 126 )&Oligo status:all filters passed&-&Well:4G4...	0.00293041	-0.183645	8.95066	8
Sm_intergen_2630	-&pSymB_ig_360 (160 bp, from 1020904 to 1021063) ( position: 0 to 49 )&Oligo status:all filters passed&-&Well:13F21...	0.0244157	-0.184664	8.58519	8
SMa1996	-&Putative ABC transporter, permease protein&Oligo status:all filters passed&-&Well:5F20...	0.0219186	-0.185463	8.37941	8
Sm_intergen_1475	-&pSymA_ig_538 (409 bp, from 1199327 to 1199735) ( position: 163 to 212 )&Oligo status:all filters passed&-&Well:8C21...	0.0140752	-0.186429	10.228	8
Sm_intergen_6522	-&S._meliloti_chromosome_ig_488 (361 bp, from 1081281 to 1081641) ( position: 146 to 195 )&Oligo status:all filters passed&-&Well:31D13...	0.0355621	-0.186475	13.6899	8
SMc00132	-&HYPOTHETICAL PROTEIN&Oligo status:all filters passed&-&Well:17O23...	0.00102261	-0.186646	9.84935	8
SMb20499	-&putative glycerol-3-phosphate dehydrogenase protein&Oligo status:all filters passed&-&Well:9A10...	0.0296533	-0.18828	8.29169	8
Sm_intergen_5531	-&S._meliloti_chromosome_ig_1681_rc (277 bp, from 3637954 to 3637678) ( position: 193 to 242 )&Oligo status:all filters passed&-&Well:25E23...	0.0214654	-0.189228	8.11465	8
Sm_intergen_5640	-&S._meliloti_chromosome_ig_206_rc (255 bp, from 459140 to 458886) ( position: 100 to 149 )&Oligo status:uniqueness filter failed for at least one oligo in intergenic region&-&Well:27B6...	0.021841	-0.189435	8.64508	8
SMc01541	-&CONSERVED HYPOTHETICAL PROTEIN&Oligo status:all filters passed&-&Well:26M17...	0.0141396	-0.189584	9.02574	8
SMc00455	-&HYPOTHETICAL TRANSMEMBRANE PROTEIN&Oligo status:all filters passed&-&Well:17J11...	0.0424322	-0.190076	10.3382	8
Sm_intergen_1430	-&pSymA_ig_522 (192 bp, from 1157086 to 1157277) ( position: 32 to 81 )&Oligo status:all filters passed&-&Well:8F18...	0.00135732	-0.190086	8.59491	8
SMb21645	-&putative ABC transporter permease protein&Oligo status:all filters passed&-&Well:14H09...	0.000803606	-0.190345	10.0689	8
Sm_intergen_2959	-&pSymB_ig_485 (109 bp, from 1363857 to 1363965) ( position: 7 to 56 )&Oligo status:all filters passed&-&Well:15O17...	0.0436249	-0.190419	8.72301	8
Sm_intergen_2100	-&pSymB_ig_20 (120 bp, from 60191 to 60310) ( position: 28 to 77 )&Oligo status:all filters passed&-&Well:12D12...	0.0038953	-0.191438	10.4802	8
Sm_intergen_1307	-&pSymA_ig_489 (594 bp, from 1097019 to 1097612) ( position: 100 to 149 )&Oligo status:all filters passed&-&Well:8K10...	0.0177562	-0.191779	10.4018	8
SMc02231	-&HYPOTHETICAL PROTEIN&Oligo status:all filters passed&-&Well:28J08...	0.0275879	-0.191806	8.13921	8
SMc00243	-&PUTATIVE TRANSPORT SYSTEM PERMEASE ABC TRANSPORTER PROTEIN&Oligo status:all filters passed&-&Well:17M14...	0.0342589	-0.191859	12.9691	8
SMb20926	-&hypothetical exported protein&Oligo status:all filters passed&-&Well:11I23...	0.0149937	-0.191867	8.26393	8
Sm_intergen_4608	-&S._meliloti_chromosome_ig_1418 (713 bp, from 3051474 to 3052186) ( position: 462 to 511 )&Oligo status:uniqueness filter failed for at least one oligo in intergenic region&-&Well:22J13...	0.00140719	-0.193213	10.3077	8
Sm_intergen_7272	-&S._meliloti_chromosome_ig_728_rc (132 bp, from 1612962 to 1612831) ( position: 71 to 120 )&Oligo status:all filters passed&-&Well:35B12...	0.0277322	-0.193941	9.17308	8
Sm_intergen_6195	-&S._meliloti_chromosome_ig_361_rc (317 bp, from 820589 to 820273) ( position: 157 to 206 )&Oligo status:all filters passed&-&Well:29M16...	0.00739195	-0.194265	9.55515	8
SMc02262	-&PUTATIVE AMINOTRANSFERASE PROTEIN&Oligo status:all filters passed&-&Well:28N20...	9.6808e-05	-0.194616	9.34944	8
Sm_intergen_5457	-&S._meliloti_chromosome_ig_1652_rc (227 bp, from 3570797 to 3570571) ( position: 54 to 103 )&Oligo status:all filters passed&-&Well:25K18...	0.00796706	-0.194754	11.1235	8
Sm_intergen_4194	-&S._meliloti_chromosome_ig_1293 (6914 bp, from 2805257 to 2812170) ( position: 4020 to 4069 ), rRNA operon&Oligo status:uniqueness filter failed for at least one oligo in intergenic region&-&Well:21L11...	0.0482048	-0.194788	10.0859	8
Sm_intergen_4759	-&S._meliloti_chromosome_ig_1478 (440 bp, from 3187935 to 3188374) ( position: 169 to 218 )&Oligo status:all filters passed&-&Well:22A23...	0.0420644	-0.195944	8.93023	8
Sm_intergen_3570	-&S._meliloti_chromosome_ig_107_rc (377 bp, from 286304 to 285928) ( position: 146 to 195 )&Oligo status:all filters passed&-&Well:18L20...	0.0110179	-0.196466	8.25993	8
Sm_intergen_5920	-&S._meliloti_chromosome_ig_304 (614 bp, from 685194 to 685807) ( position: 156 to 205 )&Oligo status:all filters passed&-&Well:27J23...	0.0507375	-0.196508	8.42465	8
SMc01990	-&PUTATIVE FERREDOXIN REDUCTASE PROTEIN&Oligo status:all filters passed&-&Well:28K05...	0.0233579	-0.197885	11.4841	8
Sm_intergen_2341	-&pSymB_ig_257 (546 bp, from 675028 to 675573) ( position: 239 to 288 )&Oligo status:uniqueness filter failed for at least one oligo in intergenic region&-&Well:13E3...	0.0174406	-0.198838	8.91422	8
Sm_intergen_6281	-&S._meliloti_chromosome_ig_393_rc (140 bp, from 883723 to 883584) ( position: 0 to 49 )&Oligo status:all filters passed&-&Well:29C22...	0.00511355	-0.199153	10.6692	8
SMb20779	-&hypothetical protein of ISRm2011-2, orfC N-terminus&Oligo status:uniqueness filter failed&-&Well:36P19...	0.0104003	-0.199207	10.683	8
Sm_intergen_4452	-&S._meliloti_chromosome_ig_1360 (401 bp, from 2940106 to 2940506) ( position: 350 to 399 )&Oligo status:uniqueness filter failed for at least one oligo in intergenic region&-&Well:22N3...	0.0245559	-0.200022	11.8329	8
SMc00289	cspA5&PUTATIVE COLD SHOCK TRANSCRIPTION REGULATOR PROTEIN&Oligo status:all filters passed&-&Well:17D22...	0.0227836	-0.200405	11.052	8
Sm_intergen_2146	-&pSymB_ig_208 (1048 bp, from 581325 to 582372) ( position: 117 to 166 )&Oligo status:all filters passed&-&Well:12B15...	0.00240975	-0.200444	10.0378	8
SMc01123	mviN&PUTATIVE VIRULENCE FACTOR MVIN HOMOLOG TRANSMEMBRANE PROTEIN&Oligo status:all filters passed&-&Well:23E12...	0.00573844	-0.20062	10.2657	8
SMa0301	-&hypothetical protein&Oligo status:all filters passed&-&Well:1I24...	0.0432073	-0.203701	8.53899	8
Sm_intergen_304	-&pSymA_ig_179 (423 bp, from 394269 to 394691) ( position: 104 to 153 )&Oligo status:all filters passed&-&Well:2P19...	0.0180406	-0.203981	8.34471	8
SMc02588	-&PUTATIVE PERMEASE ABC TRANSPORTER PROTEIN&Oligo status:all filters passed&-&Well:30I24...	0.0302447	-0.204146	8.73606	8
SMc02572	hisH&PROBABLE GLUTAMINE AMIDOTRANSFERASE PROTEIN&Oligo status:all filters passed&-&Well:30G16...	0.0409537	-0.204643	10.365	8
SMc02415	-&PUTATIVE PEPTIDE-BINDING PERIPLASMIC ABC TRANSPORTER PROTEIN&Oligo status:all filters passed&-&Well:30A19...	0.0465559	-0.204975	9.07535	8
Sm_intergen_4976	-&S._meliloti_chromosome_ig_1520_rc (118 bp, from 3291142 to 3291025) ( position: 0 to 49 )&Oligo status:uniqueness filter failed for at least one oligo in intergenic region&-&Well:24J12...	0.00534567	-0.20632	9.01586	8
Sm_intergen_4532	-&S._meliloti_chromosome_ig_1391 (175 bp, from 2998682 to 2998856) ( position: 44 to 93 )&Oligo status:all filters passed&-&Well:22N8...	0.0496947	-0.206852	8.34465	8
Sm_intergen_5000	-&S._meliloti_chromosome_ig_1530_rc (282 bp, from 3316359 to 3316078) ( position: 98 to 147 )&Oligo status:all filters passed&-&Well:24B14...	0.00660179	-0.207499	11.3295	8
Sm_intergen_1892	-&pSymB_ig_14 (192 bp, from 51512 to 51703) ( position: 114 to 163 )&Oligo status:all filters passed&-&Well:10D23...	0.0291847	-0.208012	9.61551	8
Sm_intergen_6791	-&S._meliloti_chromosome_ig_578_rc (247 bp, from 1276341 to 1276095) ( position: 63 to 112 )&Oligo status:all filters passed&-&Well:33A6...	0.0336988	-0.208028	8.76247	8
Sm_intergen_4100	-&S._meliloti_chromosome_ig_1264_rc (202 bp, from 2705882 to 2705681) ( position: 56 to 105 )&Oligo status:all filters passed&-&Well:21N5...	0.0216821	-0.208038	12.0808	8
SMc04385	-&PUTATIVE ALDEHYDE DEHYDROGENASE TRANSMEMBRANE PROTEIN&Oligo status:all filters passed&-&Well:36G09...	0.0501764	-0.208549	12.3526	8
Sm_intergen_1335	-&pSymA_ig_496 (126 bp, from 1107562 to 1107687) ( position: 8 to 57 )&Oligo status:all filters passed&-&Well:8G12...	0.00232171	-0.209792	9.32075	8
SMc00919	hisS&PROBABLE HISTIDYL-TRNA SYNTHETASE PROTEIN&Oligo status:all filters passed&-&Well:20J19...	0.0444691	-0.210378	9.94451	8
Sm_intergen_5339	-&S._meliloti_chromosome_ig_1604 (524 bp, from 3479628 to 3480151) ( position: 371 to 420 )&Oligo status:all filters passed&-&Well:25E11...	0.0274495	-0.210918	8.85949	8
SMa1243	azu1&Azu1 pseudoazurin (blue copper protein)&Oligo status:all filters passed&-&Well:3F12...	0.00924271	-0.211159	9.26849	8
Sm_intergen_4345	-&S._meliloti_chromosome_ig_1322_rc (126 bp, from 2871125 to 2871000) ( position: 70 to 119 )&Oligo status:all filters passed&-&Well:21C21...	0.0310927	-0.211325	9.20329	8
SMc00983	-&HYPOTHETICAL/UNKNOWN PROTEIN&Oligo status:all filters passed&-&Well:23C17...	0.0495914	-0.211404	8.05362	8
SMb21479	-&HYPOTHETICAL PROTEIN&Oligo status:all filters passed&-&Well:14O20...	0.00914285	-0.211694	9.84459	8
SMc00321	truB&PROBABLE TRNA PSEUDOURIDINE SYNTHASE B PROTEIN&Oligo status:all filters passed&-&Well:17H08...	0.037215	-0.211794	9.24041	8
SMc02568	hisE&PROBABLE PHOSPHORIBOSYL-ATP PYROPHOSPHATASE PROTEIN&Oligo status:all filters passed&-&Well:30G08...	0.0413028	-0.211893	10.079	8
Sm_intergen_1703	-&pSymA_ig_7 (296 bp, from 18914 to 19209) ( position: 100 to 149 )&Oligo status:all filters passed&-&Well:10G11...	0.0122058	-0.21292	10.5724	8
SMb21152	-&putative sugar uptake ABC transporter ATP-binding protein&Oligo status:all filters passed&-&Well:11N10...	0.0308879	-0.214139	9.76865	8
Sm_intergen_6624	-&S._meliloti_chromosome_ig_520_rc (682 bp, from 1148609 to 1147928) ( position: 503 to 552 )&Oligo status:all filters passed&-&Well:31J19...	0.0146188	-0.214166	10.6656	8
Sm_intergen_1190	-&pSymA_ig_457_rc (596 bp, from 1024493 to 1023898) ( position: 487 to 536 )&Oligo status:uniqueness filter failed for at least one oligo in intergenic region&-&Well:8F3...	0.00140844	-0.214465	10.0859	8
Sm_intergen_6284	-&S._meliloti_chromosome_ig_395 (110 bp, from 887053 to 887162) ( position: 0 to 49 )&Oligo status:uniqueness filter failed for at least one oligo in intergenic region&-&Well:29F22...	0.017149	-0.214494	10.8428	8
Sm_intergen_6704	-&S._meliloti_chromosome_ig_55 (166 bp, from 159878 to 160043) ( position: 22 to 71 )&Oligo status:uniqueness filter failed for at least one oligo in intergenic region&-&Well:31J24...	0.0211972	-0.216083	8.49757	8
Sm_intergen_5548	-&S._meliloti_chromosome_ig_17_rc (349 bp, from 32788 to 32440) ( position: 194 to 243 )&Oligo status:uniqueness filter failed for at least one oligo in intergenic region&-&Well:25F24...	0.00106334	-0.216733	8.23396	8
Sm_intergen_5839	-&S._meliloti_chromosome_ig_275_rc (236 bp, from 618694 to 618459) ( position: 86 to 135 )&Oligo status:all filters passed&-&Well:27I18...	0.0174184	-0.216925	8.68374	8
SMc02438	lysC&PROBABLE ASPARTOKINASE PROTEIN&Oligo status:all filters passed&-&Well:30E15...	0.00296543	-0.217282	10.1128	8
Sm_intergen_2654	-&pSymB_ig_371 (158 bp, from 1050797 to 1050954) ( position: 19 to 68 )&Oligo status:all filters passed&-&Well:13N22...	0.0010996	-0.218382	9.48646	8
Sm_intergen_3357	-&pSymB_ig_95 (244 bp, from 266571 to 266814) ( position: 95 to 144 )&Oligo status:all filters passed&-&Well:18G7...	0.00193758	-0.218399	11.8125	8
Sm_intergen_4772	-&S._meliloti_chromosome_ig_1482_rc (150 bp, from 3194275 to 3194126) ( position: 46 to 95 )&Oligo status:all filters passed&-&Well:22N23...	0.0204962	-0.218455	10.151	8
SMc01169	ald&PROBABLE ALANINE DEHYDROGENASE OXIDOREDUCTASE PROTEIN&Oligo status:all filters passed&-&Well:23M08...	0.0115343	-0.218787	10.373	8
SMb21575	-&putative transport protein&Oligo status:all filters passed&-&Well:14P12...	0.0267198	-0.219008	9.93025	8
Sm_intergen_4344	-&S._meliloti_chromosome_ig_1322 (126 bp, from 2871000 to 2871125) ( position: 6 to 55 )&Oligo status:all filters passed&-&Well:21B21...	0.0132571	-0.219578	10.5139	8
SMc03881	rpmF&PROBABLE 50S RIBOSOMAL PROTEIN L32&Oligo status:all filters passed&-&Well:34G13...	0.027356	-0.219812	11.676	8
SMc01136	-&HYPOTHETICAL TRANSMEMBRANE PROTEIN&Oligo status:all filters passed&-&Well:23G14...	0.000900695	-0.2202	11.3399	8
SMc02914	infB&PROBABLE TRANSLATION INITIATION FACTOR IF-2 PROTEIN&Oligo status:all filters passed&-&Well:32G03...	0.0289384	-0.220479	10.4764	8
Sm_intergen_5161	-&S._meliloti_chromosome_ig_1567 (2160 bp, from 3389787 to 3391946) ( position: 926 to 975 )&Oligo status:all filters passed&-&Well:24C24...	0.00180315	-0.220706	10.7936	8
SMb21490	-&putative SUR1-like protein, similar to Bradyrhizobium japonicum shb1 gene&Oligo status:all filters passed&-&Well:14B20...	0.00915069	-0.221266	9.07306	8
Sm_intergen_2075	-&pSymB_ig_195_rc (1109 bp, from 564786 to 563678) ( position: 113 to 162 )&Oligo status:all filters passed&-&Well:12K10...	0.0113117	-0.221544	8.35334	8
Sm_intergen_5321	-&S._meliloti_chromosome_ig_1599_rc (426 bp, from 3468805 to 3468380) ( position: 345 to 394 )&Oligo status:uniqueness filter failed for at least one oligo in intergenic region&-&Well:25C10...	0.00640376	-0.221562	8.63302	8
SMc02695	-&PUTATIVE GTP-BINDING PROTEIN&Oligo status:all filters passed&-&Well:30H12...	0.00770093	-0.221704	10.1519	8
Sm_intergen_6680	-&S._meliloti_chromosome_ig_542 (105 bp, from 1197286 to 1197390) ( position: 0 to 49 )&Oligo status:all filters passed&-&Well:31B23...	0.0337413	-0.221926	8.09717	8
Sm_intergen_1514	-&pSymA_ig_545_rc (1126 bp, from 1221480 to 1220355) ( position: 881 to 930 )&Oligo status:all filters passed&-&Well:8J23...	0.00582881	-0.222454	8.81931	8
SMc03882	gst8&PUTATIVE GLUTATHIONE S-TRANSFERASE PROTEIN&Oligo status:all filters passed&-&Well:34G15...	0.0248828	-0.223822	10.1027	8
Sm_intergen_3589	-&S._meliloti_chromosome_ig_1077 (163 bp, from 2319095 to 2319257) ( position: 21 to 70 )&Oligo status:all filters passed&-&Well:18O21...	0.0488977	-0.224018	8.21929	8
Sm_intergen_6297	-&S._meliloti_chromosome_ig_40_rc (306 bp, from 111802 to 111497) ( position: 131 to 180 )&Oligo status:all filters passed&-&Well:29C23...	0.0107197	-0.224907	9.94009	8
SMc00450	ctaB&PUTATIVE HEME O SYNTHASE TRANSMEMBRANE PROTEIN&Oligo status:all filters passed&-&Well:17J01...	0.0176736	-0.224925	10.5081	8
Sm_intergen_5297	-&S._meliloti_chromosome_ig_1590 (217 bp, from 3451250 to 3451466) ( position: 166 to 215 )&Oligo status:all filters passed&-&Well:25K8...	0.0114924	-0.226777	8.16566	8
SMc02618	-&CONSERVED HYPOTHETICAL TRANSMEMBRANE PROTEIN&Oligo status:all filters passed&-&Well:30O10...	0.0286985	-0.227157	12.054	8
Sm_intergen_5836	-&S._meliloti_chromosome_ig_274 (182 bp, from 616926 to 617107) ( position: 129 to 178 )&Oligo status:all filters passed&-&Well:27F18...	0.0114099	-0.228173	8.49933	8
SMc03227	-&CONSERVED HYPOTHETICAL PROTEIN&Oligo status:all filters passed&-&Well:32J20...	0.0507533	-0.228409	9.81824	8
SMa1532	nuoB2&NuoB2 NADH I CHAIN B&Oligo status:all filters passed&-&Well:3N23...	0.0118826	-0.229513	9.29683	8
SMc03828	-&PUTATIVE ATP-BINDING ABC TRANSPORTER PROTEIN&Oligo status:all filters passed&-&Well:32P03...	0.0103146	-0.229778	9.53455	8
SMc02496	priA&PROBABLE PRIMOSOMAL PROTEIN N' (REPLICATION FACTOR Y)&Oligo status:all filters passed&-&Well:30M17...	0.0282291	-0.230706	10.4822	8
SMc02488	-&HYPOTHETICAL TRANSMEMBRANE PROTEIN&Oligo status:all filters passed&-&Well:30M01...	0.00635352	-0.231078	11.1149	8
Sm_intergen_7472	-&S._meliloti_chromosome_ig_784_rc (809 bp, from 1735136 to 1734328) ( position: 280 to 329 )&Oligo status:all filters passed&-&Well:35J24...	0.0076945	-0.231264	9.49913	8
SMc01090	deaD&PUTATIVE ATP-DEPENDENT RNA HELICASE PROTEIN&Oligo status:all filters passed&-&Well:23O19...	0.0220121	-0.231383	8.27938	8
Sm_intergen_2082	-&pSymB_ig_196 (869 bp, from 566660 to 567528) ( position: 583 to 632 )&Oligo status:all filters passed&-&Well:12B11...	0.0284547	-0.231611	8.61081	8
Sm_intergen_3252	-&pSymB_ig_599_rc (246 bp, from 1670199 to 1669954) ( position: 135 to 184 )&Oligo status:all filters passed&-&Well:16D12...	0.0217319	-0.232497	10.0444	8
Sm_intergen_1656	-&pSymA_ig_589 (875 bp, from 1339000 to 1339874) ( position: 821 to 870 )&Oligo status:uniqueness filter failed for at least one oligo in intergenic region&-&Well:10H8...	0.002396	-0.232557	8.81408	8
Sm_intergen_7470	-&S._meliloti_chromosome_ig_784 (809 bp, from 1734328 to 1735136) ( position: 577 to 626 )&Oligo status:all filters passed&-&Well:35H24...	0.00185652	-0.232571	11.8605	8
Sm_intergen_179	-&pSymA_ig_143 (222 bp, from 307339 to 307560) ( position: 62 to 111 )&Oligo status:all filters passed&-&Well:2C12...	0.00683465	-0.233538	8.55096	8
SMc01320	rplA&PROBABLE 50S RIBOSOMAL PROTEIN L1&Oligo status:all filters passed&-&Well:23D03...	0.0491929	-0.234521	11.3614	8
SMc00986	-&HYPOTHETICAL PROTEIN&Oligo status:all filters passed&-&Well:23C23...	0.0447359	-0.235043	11.0907	8
Sm_intergen_4392	-&S._meliloti_chromosome_ig_1339_rc (138 bp, from 2909011 to 2908874) ( position: 0 to 49 )&Oligo status:all filters passed&-&Well:21B24...	0.0192713	-0.23648	10.5575	8
SMb20464	-&HYPOTHETICAL PROTEIN&Oligo status:all filters passed&-&Well:9K11...	0.0421178	-0.236611	10.054	8
Sm_intergen_6648	-&S._meliloti_chromosome_ig_529 (104 bp, from 1164316 to 1164419) ( position: 0 to 49 )&Oligo status:all filters passed&-&Well:31B21...	0.00893712	-0.237379	8.4167	8
Sm_intergen_627	-&pSymA_ig_279_rc (492 bp, from 576097 to 575606) ( position: 166 to 215 )&Oligo status:all filters passed&-&Well:4C16...	0.0229243	-0.237444	10.8811	8
SMc00913	groEL1&60 KD CHAPERONIN A PROTEIN&Oligo status:uniqueness filter failed&-&Well:38G17...	0.0211771	-0.237696	12.5816	8
SMc01782	-&HYPOTHETICAL PROTEIN&Oligo status:all filters passed&-&Well:26N08...	0.00986372	-0.238265	8.5787	8
SMa0695	arcB&ArcB catabolic ornithine carbamoyl transferase&Oligo status:all filters passed&-&Well:1J09...	0.0173102	-0.238518	8.74161	8
SMb20069	-&putative amino acid carrier protein&Oligo status:all filters passed&-&Well:7O07...	0.000439715	-0.240791	9.25726	8
SMc03973	-&CONSERVED HYPOTHETICAL PROTEIN&Oligo status:all filters passed&-&Well:34A06...	0.0258954	-0.241305	14.793	8
SMc01969	-&PUTATIVE AMINOTRANSFERASE PROTEIN&Oligo status:all filters passed&-&Well:28G11...	0.045142	-0.242719	14.1136	8
SMc00266	-&PUTATIVE TRANSMEMBRANE PROTEIN&Oligo status:all filters passed&-&Well:17B08...	0.0136816	-0.24278	8.0409	8
Sm_intergen_4730	-&S._meliloti_chromosome_ig_147 (257 bp, from 352402 to 352658) ( position: 0 to 49 )&Oligo status:all filters passed&-&Well:22D21...	0.0184471	-0.243114	12.8132	8
SMc01027	kdsA&PROBABLE 2-DEHYDRO-3-DEOXYPHOSPHOOCTONATE ALDOLASE PROTEIN&Oligo status:all filters passed&-&Well:23K09...	0.0115771	-0.243277	10.0502	8
SMa2000	-&Putative ABC transporter, periplasmic solute-binding protein&Oligo status:all filters passed&-&Well:5F24...	0.00130543	-0.243304	8.37694	8
SMb20615	thiC&putative thiamine biosynthesis protein&Oligo status:all filters passed&-&Well:9B22...	0.0379291	-0.243568	8.33693	8
SMb20293	-&HYPOTHETICAL PROTEIN&Oligo status:all filters passed&-&Well:7B13...	0.0160053	-0.244869	10.6728	8
Sm_intergen_4413	-&S._meliloti_chromosome_ig_1344_rc (265 bp, from 2919147 to 2918883) ( position: 31 to 80 )&Oligo status:all filters passed&-&Well:22G1...	0.0405983	-0.245	10.2573	8
Sm_intergen_2218	-&pSymB_ig_23_rc (1661 bp, from 66644 to 64984) ( position: 1009 to 1058 )&Oligo status:all filters passed&-&Well:12J19...	0.00188168	-0.245651	11.1033	8
SMc04183	-&PUTATIVE TRANSMEMBRANE PROTEIN&Oligo status:all filters passed&-&Well:34L08...	0.00630481	-0.245782	13.5397	8
Sm_intergen_958	-&pSymA_ig_396_rc (123 bp, from 899769 to 899647) ( position: 3 to 52 )&Oligo status:uniqueness filter failed for at least one oligo in intergenic region&-&Well:6N12...	0.00142114	-0.246594	10.1022	8
SMa1495	-&putative serine-pyruvate transaminase&Oligo status:all filters passed&-&Well:3L11...	8.13024e-05	-0.247841	12.4742	8
SMb20669	-&conserved hypothetical protein, possibly hydroxypyruvate isomerase&Oligo status:all filters passed&-&Well:9J06...	0.010711	-0.247961	8.38786	8
Sm_intergen_7783	-&S._meliloti_chromosome_ig_892_rc (129 bp, from 1963987 to 1963859) ( position: 3 to 52 )&Oligo status:all filters passed&-&Well:37A20...	0.0370043	-0.252718	9.61755	8
SMc03192	cobH&PROBABLE PRECORRIN-8X METHYLMUTASE PROTEIN&Oligo status:all filters passed&-&Well:32F24...	0.0309221	-0.252951	9.41105	8
Sm_intergen_5980	-&S._meliloti_chromosome_ig_320 (267 bp, from 733996 to 734262) ( position: 117 to 166 )&Oligo status:all filters passed&-&Well:29F3...	0.0134862	-0.253138	9.12561	8
Sm_intergen_6803	-&S._meliloti_chromosome_ig_583_rc (207 bp, from 1296723 to 1296517) ( position: 6 to 55 )&Oligo status:all filters passed&-&Well:33M6...	0.000847212	-0.253765	9.49255	8
SMc00850	-&CONSERVED HYPOTHETICAL PROTEIN&Oligo status:all filters passed&-&Well:20P22...	0.016757	-0.25472	9.51978	8
SMc03986	-&HYPOTHETICAL TRANSMEMBRANE PROTEIN&Oligo status:all filters passed&-&Well:36P18...	0.00422302	-0.255906	9.61369	8
SMc00414	-&CONSERVED HYPOTHETICAL PROTEIN&Oligo status:all filters passed&-&Well:17F13...	0.0377944	-0.256916	9.55047	8
SMb21484	rpoE5&putative RNA polymerase sigma-E factor (sigma-24) protein&Oligo status:all filters passed&-&Well:14B08...	0.0475089	-0.256956	11.0535	8
Sm_intergen_857	-&pSymA_ig_362 (172 bp, from 797222 to 797393) ( position: 111 to 160 )&Oligo status:all filters passed&-&Well:6I6...	0.0289348	-0.257793	13.203	8
Sm_intergen_6591	-&S._meliloti_chromosome_ig_51 (105 bp, from 154027 to 154131) ( position: 1 to 50 )&Oligo status:uniqueness filter failed for at least one oligo in intergenic region&-&Well:31I17...	0.0274688	-0.258132	9.57324	8
SMc00725	argH1&PROBABLE ARGININOSUCCINATE LYASE ASAL PROTEIN&Oligo status:all filters passed&-&Well:20B08...	0.0437739	-0.259507	9.24957	8
SMc04882	-&PROBABLE TRANSCRIPTION REGULATOR PROTEIN&Oligo status:all filters passed&-&Well:36A04...	0.0267621	-0.259927	9.53339	8
Sm_intergen_3053	-&pSymB_ig_521_rc (528 bp, from 1450582 to 1450055) ( position: 357 to 406 )&Oligo status:all filters passed&-&Well:15M23...	0.0287737	-0.260733	8.33113	8
SMc01766	hemB&PROBABLE DELTA-AMINOLEVULINIC ACID DEHYDRATASE PROTEIN&Oligo status:all filters passed&-&Well:26J24...	0.0412322	-0.263828	9.93248	8
SMc01468	cheW2&PROBABLE CHEMOTAXIS PROTEIN&Oligo status:all filters passed&-&Well:26E11...	0.01461	-0.264478	9.49965	8
Sm_intergen_2214	-&pSymB_ig_23 (1661 bp, from 64984 to 66644) ( position: 260 to 309 )&Oligo status:all filters passed&-&Well:12F19...	0.0492958	-0.267184	12.3221	8
SMc03830	-&CONSERVED HYPOTHETICAL PROTEIN&Oligo status:all filters passed&-&Well:32P07...	0.0173095	-0.267779	12.1768	8
SMc02113	cysE&PROBABLE SERINE ACETYLTRANSFERASE PROTEIN&Oligo status:all filters passed&-&Well:28K12...	0.0442156	-0.268048	9.75294	8
Sm_intergen_7273	-&S._meliloti_chromosome_ig_729 (250 bp, from 1614086 to 1614335) ( position: 95 to 144 )&Oligo status:all filters passed&-&Well:35C12...	0.0426502	-0.269321	9.26581	8
Sm_intergen_4577	-&S._meliloti_chromosome_ig_1408 (580 bp, from 3031428 to 3032007) ( position: 413 to 462 )&Oligo status:all filters passed&-&Well:22K11...	0.044332	-0.269623	8.76833	7
SMc00092	cysH&PROBABLE PHOSPHOADENOSINE PHOSPHOSULFATE REDUCTASE PAPS REDUCTASE, THIOREDOXIN DEPENDENT PADOPS REDUCTASE 3'-PHOSPHOADENYLYLSULFATE SULFOTRANSFERASE CYSTEINE BIOSYNTHESIS PROTEIN&Oligo status:all filters passed&-&Well:17K09...	0.0321683	-0.269706	8.27842	8
SMc03020	fliN&FLAGELLAR MOTOR SWITCH PROTEIN&Oligo status:all filters passed&-&Well:32M09...	0.0266144	-0.270032	10.5386	8
SMc00887	-&HYPOTHETICAL PROTEIN&Oligo status:all filters passed&-&Well:20F19...	0.000549579	-0.270781	9.09807	8
SMc03772	rpmA&PROBABLE 50S RIBOSOMAL PROTEIN L27&Oligo status:all filters passed&-&Well:32F15...	0.0157277	-0.271056	11.9886	8
SMb20243	-&putative glycosyltransferase protein&Oligo status:all filters passed&-&Well:7J10...	0.0230432	-0.272241	8.74342	8
SMc01443	gst6&PUTATIVE GLUTATHIONE S-TRANSFERASE PROTEIN&Oligo status:all filters passed&-&Well:26A13...	0.0177103	-0.272765	9.98723	8
Sm_intergen_2378	-&pSymB_ig_260 (214 bp, from 682011 to 682224) ( position: 93 to 142 )&Oligo status:all filters passed&-&Well:13J5...	0.00122318	-0.273952	8.72556	8
SMa1985	-&Hypothetical protein&Oligo status:all filters passed&-&Well:5F08...	0.00709825	-0.274156	9.15395	8
SMb20649	nadE1&putative NH(3)-dependent NAD(+) synthetase protein&Oligo status:all filters passed&-&Well:9F18...	0.0260441	-0.275507	8.36276	8
Sm_intergen_7044	-&S._meliloti_chromosome_ig_658 (218 bp, from 1461408 to 1461625) ( position: 168 to 217 )&Oligo status:uniqueness filter failed for at least one oligo in intergenic region&-&Well:33N21...	0.0130122	-0.277746	11.4318	8
Sm_intergen_2553	-&pSymB_ig_33_rc (164 bp, from 82331 to 82168) ( position: 106 to 155 )&Oligo status:all filters passed&-&Well:13I16...	0.0117236	-0.280153	11.7601	8
SMc00873	kup1&PROBABLE KUP SYSTEM POTASSIUM UPTAKE TRANSMEMBRANE PROTEIN&Oligo status:all filters passed&-&Well:20D17...	0.0133061	-0.280217	8.27421	8
Sm_intergen_4571	-&S._meliloti_chromosome_ig_1406 (332 bp, from 3024815 to 3025146) ( position: 279 to 328 )&Oligo status:uniqueness filter failed for at least one oligo in intergenic region&-&Well:22E11...	0.00415372	-0.281539	8.35716	8
Sm_intergen_4994	-&S._meliloti_chromosome_ig_1528_rc (257 bp, from 3311706 to 3311450) ( position: 144 to 193 )&Oligo status:all filters passed&-&Well:24L13...	0.00227002	-0.281963	9.11903	8
SMc02436	prfA&PROBABLE PEPTIDE CHAIN RELEASE FACTOR 1 (RF-1) PROTEIN&Oligo status:all filters passed&-&Well:30E11...	0.0310474	-0.282447	8.37581	8
Sm_intergen_7632	-&S._meliloti_chromosome_ig_836 (420 bp, from 1845254 to 1845673) ( position: 348 to 397 )&Oligo status:uniqueness filter failed for at least one oligo in intergenic region&-&Well:37J10...	0.00756127	-0.283151	9.60415	8
Sm_intergen_5874	-&S._meliloti_chromosome_ig_289_rc (663 bp, from 660004 to 659342) ( position: 174 to 223 )&Oligo status:all filters passed&-&Well:27L20...	0.00347057	-0.284138	10.0138	8
Sm_intergen_5723	-&S._meliloti_chromosome_ig_239 (339 bp, from 534386 to 534724) ( position: 150 to 199 )&Oligo status:all filters passed&-&Well:27E11...	0.00715189	-0.284583	8.07805	8
SMc01471	senC&PUTATIVE CYTOCHROME C OXIDASE ASSEMBLY FACTOR TRANSMEMBRANE PROTEIN&Oligo status:all filters passed&-&Well:26E15...	0.00250831	-0.285248	9.07535	8
SMc02862	-&PIT ACCESSORY PROTEIN&Oligo status:all filters passed&-&Well:30N21...	0.0426176	-0.287018	8.09279	8
SMc02545	-&HYPOTHETICAL TRANSMEMBRANE PROTEIN&Oligo status:all filters passed&-&Well:30C12...	0.0111189	-0.287754	10.1963	8
SMc02896	ilvE1&PROBABLE BRANCHED-CHAIN AMINO ACID AMINOTRANSFERASE PROTEIN&Oligo status:all filters passed&-&Well:32C17...	0.00822919	-0.289152	9.23594	8
SMc02181	putA&BIFUNCTIONAL: PROLINE DEHYDROGENASE AND DELTA-1-PYRROLINE-5-CARBOXYLATE DEHYDROGENASE PROTEIN&Oligo status:all filters passed&-&Well:28F10...	0.0087172	-0.289238	8.63238	8
Sm_intergen_7186	-&S._meliloti_chromosome_ig_703 (136 bp, from 1553312 to 1553447) ( position: 60 to 109 )&Oligo status:all filters passed&-&Well:35L6...	0.0399053	-0.29075	9.50005	8
SMb20761	phnI&putative C-P (carbon-phosphorus) lyase component protein&Oligo status:all filters passed&-&Well:9F07...	0.00152413	-0.292997	10.4968	8
Sm_intergen_7509	-&S._meliloti_chromosome_ig_794 (271 bp, from 1755390 to 1755660) ( position: 110 to 159 )&Oligo status:all filters passed&-&Well:37O2...	0.0217452	-0.293012	10.5071	8
Sm_intergen_6421	-&S._meliloti_chromosome_ig_449_rc (207 bp, from 1011536 to 1011330) ( position: 68 to 117 )&Oligo status:all filters passed&-&Well:31O6...	0.0392691	-0.294832	8.91655	8
Sm_intergen_530	-&pSymA_ig_243_rc (1009 bp, from 513088 to 512080) ( position: 243 to 292 )&Oligo status:all filters passed&-&Well:4B10...	0.0393716	-0.295215	10.3809	8
Sm_intergen_3558	-&S._meliloti_chromosome_ig_1065_rc (316 bp, from 2294698 to 2294383) ( position: 199 to 248 )&Oligo status:uniqueness filter failed for at least one oligo in intergenic region&-&Well:18P19...	0.00115263	-0.297457	9.87401	8
Sm_intergen_3110	-&pSymB_ig_544 (135 bp, from 1508147 to 1508281) ( position: 64 to 113 )&Oligo status:all filters passed&-&Well:16F3...	0.00442732	-0.298185	8.95649	8
Sm_intergen_7066	-&S._meliloti_chromosome_ig_665 (124 bp, from 1478901 to 1479024) ( position: 4 to 53 )&Oligo status:all filters passed&-&Well:33D23...	0.0478531	-0.299731	11.8953	8
SMc02483	sucB&PROBABLE DIHYDROLIPOAMIDE SUCCINYL TRANSFERASE COMPONENT OF 2-OXOGLUTARATE DEHYDROGENASE COMPLEX (E2) PROTEIN&Oligo status:all filters passed&-&Well:30K15...	0.0443593	-0.300688	9.27154	8
Sm_intergen_5883	-&S._meliloti_chromosome_ig_292 (915 bp, from 662370 to 663284) ( position: 347 to 396 )&Oligo status:all filters passed&-&Well:27E21...	0.0127177	-0.302388	8.83134	8
Sm_intergen_3496	-&S._meliloti_chromosome_ig_1041_rc (188 bp, from 2249854 to 2249667) ( position: 44 to 93 )&Oligo status:all filters passed&-&Well:18B16...	0.0509154	-0.303596	8.07589	8
Sm_intergen_2615	-&pSymB_ig_356_rc (101 bp, from 1011367 to 1011267) ( position: 33 to 82 )&Oligo status:all filters passed&-&Well:13G20...	3.71094e-05	-0.306142	8.51445	8
SMc00998	-&CONSERVED HYPOTHETICAL SIGNAL PEPTIDE PROTEIN&Oligo status:all filters passed&-&Well:23E23...	0.0276746	-0.306515	8.89184	8
Sm_intergen_4547	-&S._meliloti_chromosome_ig_1398 (404 bp, from 3012028 to 3012431) ( position: 353 to 402 )&Oligo status:all filters passed&-&Well:22M9...	0.00777853	-0.307316	9.98995	8
SMc01883	-&HYPOTHETICAL TRANSMEMBRANE PROTEIN&Oligo status:all filters passed&-&Well:26N05...	0.0178631	-0.312148	8.51173	8
SMc03979	gap&PROBABLE GLYCERALDEHYDE 3-PHOSPHATE DEHYDROGENASE PROTEIN&Oligo status:all filters passed&-&Well:34A18...	4.75569e-20	-0.312449	12.1104	136
SMc03228	-&CONSERVED HYPOTHETICAL PROTEIN&Oligo status:all filters passed&-&Well:32J22...	0.00888771	-0.31359	10.4453	8
SMc00726	tlpA&PUTATIVE THIOL:DISULFIDE INTERCHANGE REDOX-ACTIVE CENTER TRANSMEMBRANE PROTEIN&Oligo status:all filters passed&-&Well:20B10...	0.0278224	-0.314738	9.54532	8
Sm_intergen_4940	-&S._meliloti_chromosome_ig_1505 (179 bp, from 3257984 to 3258162) ( position: 72 to 121 )&Oligo status:all filters passed&-&Well:24F10...	0.00638413	-0.314915	9.62492	8
Sm_intergen_7170	-&S._meliloti_chromosome_ig_697 (228 bp, from 1541537 to 1541764) ( position: 99 to 148 )&Oligo status:all filters passed&-&Well:35L5...	0.0112124	-0.317176	9.88545	8
Sm_intergen_2554	-&pSymB_ig_330 (191 bp, from 930363 to 930553) ( position: 120 to 169 )&Oligo status:uniqueness filter failed for at least one oligo in intergenic region&-&Well:13J16...	0.0010072	-0.317423	10.288	8
Sm_intergen_5500	-&S._meliloti_chromosome_ig_1669 (174 bp, from 3618347 to 3618520) ( position: 99 to 148 )&Oligo status:all filters passed&-&Well:25F21...	8.88246e-05	-0.31868	10.9938	8
Sm_intergen_705	-&pSymA_ig_303 (111 bp, from 634046 to 634156) ( position: 0 to 49 )&Oligo status:all filters passed&-&Well:4A21...	0.025438	-0.318792	8.64998	8
SMc02567	coaA&PROBABLE PANTOTHENATE KINASE PROTEIN&Oligo status:all filters passed&-&Well:30G06...	0.021076	-0.31901	8.24343	8
Sm_intergen_4477	-&S._meliloti_chromosome_ig_1370_rc (186 bp, from 2962635 to 2962450) ( position: 74 to 123 )&Oligo status:all filters passed&-&Well:22G5...	0.00495633	-0.319699	8.69739	8
SMc03829	-&PUTATIVE TRANSPORT SYSTEM PERMEASE ABC TRANSPORTER PROTEIN&Oligo status:all filters passed&-&Well:32P05...	0.0197492	-0.322866	9.58563	8
SMc01741	-&HYPOTHETICAL PROTEIN&Oligo status:all filters passed&-&Well:26H12...	0.000117844	-0.324636	11.8523	8
SMc00830	-&HYPOTHETICAL TRANSMEMBRANE PROTEIN&Oligo status:all filters passed&-&Well:20P10...	0.00326089	-0.325526	9.10588	8
Sm_intergen_4681	-&S._meliloti_chromosome_ig_1447_rc (173 bp, from 3109302 to 3109130) ( position: 44 to 93 )&Oligo status:all filters passed&-&Well:22C18...	0.013714	-0.325843	11.1749	8
Sm_intergen_1901	-&pSymB_ig_143_rc (370 bp, from 429673 to 429304) ( position: 226 to 275 )&Oligo status:all filters passed&-&Well:10M23...	0.0466607	-0.328047	8.01268	8
Sm_intergen_1034	-&pSymA_ig_410_rc (247 bp, from 926871 to 926625) ( position: 121 to 170 )&Oligo status:all filters passed&-&Well:6J17...	5.1104e-05	-0.328367	10.154	8
SMb21688	-&HYPOTHETICAL PROTEIN&Oligo status:all filters passed&-&Well:36F18...	0.00528976	-0.328845	10.1574	8
SMb20397	-&putative oxidoreductase protein&Oligo status:all filters passed&-&Well:9A13...	0.00106828	-0.329831	8.90503	8
SMb21631	nspC&putative carboxynorspermidine decarboxylase protein&Oligo status:all filters passed&-&Well:14F05...	0.000196318	-0.330598	9.73335	8
Sm_intergen_4096	-&S._meliloti_chromosome_ig_1262_rc (125 bp, from 2698596 to 2698472) ( position: 23 to 72 )&Oligo status:all filters passed&-&Well:21J5...	0.00232746	-0.331839	10.3217	8
SMc02122	fpr&PROBABLE FERREDOXIN--NADP REDUCTASE PROTEIN&Oligo status:all filters passed&-&Well:28M06...	0.000612557	-0.33387	9.73	8
Sm_intergen_6926	-&S._meliloti_chromosome_ig_623 (2020 bp, from 1376240 to 1378259) ( position: 1617 to 1666 )&Oligo status:uniqueness filter failed for at least one oligo in intergenic region&-&Well:33H14...	0.0297295	-0.334069	12.619	8
SMc03007	cheA&CHEMOTAXIS PROTEIN (SENSORY TRANSDUCTION HISTIDINE KINASE)&Oligo status:all filters passed&-&Well:32K07...	0.0251908	-0.334704	9.00109	8
Sm_intergen_4023	-&S._meliloti_chromosome_ig_1237 (400 bp, from 2642351 to 2642750) ( position: 345 to 394 )&Oligo status:uniqueness filter failed for at least one oligo in intergenic region&-&Well:21A1...	6.51569e-05	-0.335463	11.0574	8
SMc03149	-&HYPOTHETICAL PROTEIN&Oligo status:all filters passed&-&Well:32O08...	0.0078612	-0.338185	9.94535	8
SMc01648	-&CONSERVED HYPOTHETICAL PROTEIN&Oligo status:all filters passed&-&Well:26M12...	0.000471643	-0.339464	11.4698	8
SMc03031	flgA&FLAGELLAR PRECURSOR TRANSMEMBRANE PROTEIN&Oligo status:all filters passed&-&Well:32O05...	0.00347224	-0.340319	11.4996	8
Sm_intergen_3734	-&S._meliloti_chromosome_ig_1126_rc (196 bp, from 2433628 to 2433433) ( position: 66 to 115 )&Oligo status:uniqueness filter failed for at least one oligo in intergenic region&-&Well:19P6...	0.000208089	-0.34052	9.03359	8
SMc02486	-&PUTATIVE OXIDOREDUCTASE PROTEIN&Oligo status:all filters passed&-&Well:30K21...	0.0012348	-0.342056	8.50378	8
SMc02582	-&CONSERVED HYPOTHETICAL PROTEIN&Oligo status:all filters passed&-&Well:30I12...	0.00227471	-0.342295	10.0019	8
SMc03090	cheW3&PUTATIVE CHEMOTAXIS PROTEIN&Oligo status:all filters passed&-&Well:32E18...	0.000189597	-0.347072	9.45876	8
SMc02112	-&HYPOTHETICAL UNKNOWN PROTEIN&Oligo status:all filters passed&-&Well:28K10...	0.0160379	-0.348155	9.77443	8
Sm_intergen_4657	-&S._meliloti_chromosome_ig_1437_rc (319 bp, from 3092120 to 3091802) ( position: 125 to 174 )&Oligo status:all filters passed&-&Well:22K16...	0.00719421	-0.352257	10.9598	8
SMc02226	-&CONSERVED HYPOTHETICAL PROTEIN&Oligo status:all filters passed&-&Well:28H22...	0.0449546	-0.353574	8.38183	8
Sm_intergen_1519	-&pSymA_ig_547 (455 bp, from 1222512 to 1222966) ( position: 384 to 433 )&Oligo status:uniqueness filter failed for at least one oligo in intergenic region&-&Well:8O23...	0.043385	-0.354092	8.42402	8
SMc01931	-&CONSERVED HYPOTHETICAL TRANSMEMBRANE PROTEIN&Oligo status:all filters passed&-&Well:28A21...	0.0148219	-0.355963	8.40688	8
Sm_intergen_6901	-&S._meliloti_chromosome_ig_616 (278 bp, from 1361803 to 1362080) ( position: 116 to 165 )&Oligo status:all filters passed&-&Well:33O12...	0.0159674	-0.361606	8.07875	8
Sm_intergen_4748	-&S._meliloti_chromosome_ig_1474_rc (1086 bp, from 3178543 to 3177458) ( position: 100 to 149 )&Oligo status:all filters passed&-&Well:22F22...	0.0506514	-0.362191	8.5131	8
Sm_intergen_4564	-&S._meliloti_chromosome_ig_1403 (106 bp, from 3019456 to 3019561) ( position: 16 to 65 )&Oligo status:all filters passed&-&Well:22N10...	0.00033455	-0.364839	9.7462	8
SMc02175	-&PUTATIVE TRANSCRIPTION REGULATOR PROTEIN&Oligo status:all filters passed&-&Well:28D22...	0.0160374	-0.365388	10.903	8
Sm_intergen_5505	-&S._meliloti_chromosome_ig_1670 (348 bp, from 3619341 to 3619688) ( position: 201 to 250 )&Oligo status:uniqueness filter failed for at least one oligo in intergenic region&-&Well:25K21...	0.0131758	-0.367821	9.41865	7
SMc03050	flaF&PUTATIVE FLAGELLIN SYNTHESIS REGULATOR PROTEIN&Oligo status:all filters passed&-&Well:32A18...	0.00257263	-0.368491	10.5359	8
SMc00572	fabG&PROBABLE 3-OXOACYL-ACYL-CARRIER PROTEIN REDUCTASE&Oligo status:all filters passed&-&Well:20K07...	0.0398038	-0.369443	9.83099	8
Sm_intergen_2199	-&pSymB_ig_225_rc (246 bp, from 611046 to 610801) ( position: 130 to 179 )&Oligo status:all filters passed&-&Well:12G18...	0.0412875	-0.369661	8.25159	8
SMc01740	lldD1&PUTATIVE L-LACTATE DEHYDROGENASE (CYTOCHROME) PROTEIN&Oligo status:all filters passed&-&Well:26H10...	5.62038e-06	-0.373076	10.3129	8
SMc02251	-&PUTATIVE AMINOTRANSFERASE PROTEIN&Oligo status:all filters passed&-&Well:28L22...	0.0426199	-0.374811	9.23579	8
Sm_intergen_4567	-&S._meliloti_chromosome_ig_1404_rc (304 bp, from 3022233 to 3021930) ( position: 100 to 149 )&Oligo status:all filters passed&-&Well:22A11...	0.0290558	-0.37635	8.55164	8
SMc00657	-&CONSERVED HYPOTHETICAL PROTEIN&Oligo status:all filters passed&-&Well:20G02...	0.00374064	-0.378953	10.0494	8
SMc01010	thrS&PROBABLE THREONYL-TRNA SYNTHETASE PROTEIN&Oligo status:all filters passed&-&Well:23G23...	0.00588088	-0.37943	9.47582	8
Sm_intergen_5725	-&S._meliloti_chromosome_ig_24 (105 bp, from 54093 to 54197) ( position: 38 to 87 )&Oligo status:all filters passed&-&Well:27G11...	0.00605118	-0.383146	8.64831	8
SMa0887	-&hypothetical protein&Oligo status:all filters passed&-&Well:3I09...	0.02126	-0.383157	9.9063	8
Sm_intergen_6487	-&S._meliloti_chromosome_ig_474 (292 bp, from 1059880 to 1060171) ( position: 76 to 125 )&Oligo status:all filters passed&-&Well:31A11...	0.00295288	-0.384541	10.5329	8
Sm_intergen_5885	-&S._meliloti_chromosome_ig_292 (915 bp, from 662370 to 663284) ( position: 751 to 800 )&Oligo status:all filters passed&-&Well:27G21...	0.0155957	-0.386212	9.04006	8
SMc02794	hemE&PROBABLE UROPORPHYRINOGEN DECARBOXYLASE PROTEIN&Oligo status:all filters passed&-&Well:30F07...	5.15391e-05	-0.38728	9.289	8
SMc02400	-&PROBABLE OUTER MEMBRANE PROTEIN&Oligo status:all filters passed&-&Well:28P19...	0.0135366	-0.390249	11.9293	8
SMc03104	hemA&PROBABLE 5-AMINOLEVULINIC ACID SYNTHASE (DELTA-AMINOLEVULINATE SYNTHASE) (DELTA-ALA SYNTHETASE) PROTEIN&Oligo status:all filters passed&-&Well:32G20...	0.0222295	-0.390331	9.9344	8
SMc03033	-&HYPOTHETICAL TRANSMEMBRANE PROTEIN&Oligo status:all filters passed&-&Well:32O09...	0.0432939	-0.394348	10.0687	8
Sm_intergen_7045	-&S._meliloti_chromosome_ig_658 (218 bp, from 1461408 to 1461625) ( position: 68 to 117 )&Oligo status:uniqueness filter failed for at least one oligo in intergenic region&-&Well:33O21...	0.0119948	-0.398407	10.6073	8
Sm_intergen_3639	-&S._meliloti_chromosome_ig_1090_rc (885 bp, from 2357250 to 2356366) ( position: 375 to 424 )&Oligo status:all filters passed&-&Well:19A1...	0.0161084	-0.407617	13.8006	8
SMa0247	-&hypothetical protein&Oligo status:all filters passed&-&Well:1E12...	0.013927	-0.407935	9.55541	8
SMc00460	-&CONSERVED HYPOTHETICAL PROTEIN&Oligo status:all filters passed&-&Well:17J21...	0.0183709	-0.415601	10.2113	8
Sm_intergen_4594	-&S._meliloti_chromosome_ig_1413_rc (376 bp, from 3044772 to 3044397) ( position: 124 to 173 )&Oligo status:all filters passed&-&Well:22L12...	0.034235	-0.426118	9.18879	8
SMc03950	pntAa&PROBABLE PROTON-TRANSLOCATING NICOTINAMIDE NUCLEOTIDE TRANSHYDROGENASE SUBUNIT PROTEIN&Oligo status:all filters passed&-&Well:34M17...	0.0075442	-0.433009	9.3463	8
SMc03012	cheD&PROBABLE CHEMOTAXIS PROTEIN&Oligo status:all filters passed&-&Well:32K17...	0.000426956	-0.433422	8.92148	8
Sm_intergen_120	-&pSymA_ig_128 (360 bp, from 280334 to 280693) ( position: 106 to 155 )&Oligo status:all filters passed&-&Well:2H8...	1.80079e-05	-0.434101	10.3194	8
SMa0744	groEL2&groEL2 chaperonin&Oligo status:uniqueness filter failed&-&Well:36F01...	0.0105258	-0.434845	12.3264	8
Sm_intergen_2090	-&pSymB_ig_197_rc (589 bp, from 568337 to 567749) ( position: 123 to 172 )&Oligo status:all filters passed&-&Well:12J11...	0.0102372	-0.435025	9.52162	8
SMc02562	pckA&PHOSPHOENOLPYRUVATE CARBOXYKINASE PROTEIN&Oligo status:all filters passed&-&Well:30E20...	0.031326	-0.437514	9.08295	8
SMc03100	-&CONSERVED HYPOTHETICAL PROTEIN&Oligo status:all filters passed&-&Well:36P04...	0.00608514	-0.440109	10.0104	8
Sm_intergen_4758	-&S._meliloti_chromosome_ig_1477_rc (127 bp, from 3186892 to 3186766) ( position: 27 to 76 )&Oligo status:all filters passed&-&Well:22P22...	0.0017016	-0.442454	9.60313	8
SMc02940	-&HYPOTHETICAL PROTEIN&Oligo status:all filters passed&-&Well:32G05...	0.000208606	-0.444912	11.1031	8
Sm_intergen_5527	-&S._meliloti_chromosome_ig_168_rc (311 bp, from 387088 to 386778) ( position: 188 to 237 )&Oligo status:all filters passed&-&Well:25A23...	0.0452085	-0.446404	10.2254	8
SMc01242	-&SIGNAL PEPTIDE PROTEIN&Oligo status:all filters passed&-&Well:23H22...	0.00734716	-0.448408	11.6311	8
Sm_intergen_5002	-&S._meliloti_chromosome_ig_1531_rc (184 bp, from 3319643 to 3319460) ( position: 94 to 143 )&Oligo status:all filters passed&-&Well:24D14...	0.00969727	-0.449164	10.8551	8
SMc02498	atpH&PUTATIVE ATP SYNTHASE DELTA CHAIN PROTEIN&Oligo status:all filters passed&-&Well:30M21...	0.000838894	-0.456718	12.3123	8
SMb21488	cyoB&putative cytochrome o ubiquinol oxidase chain I protein&Oligo status:all filters passed&-&Well:14B16...	0.00430081	-0.457418	9.74645	8
SMc03052	flgD&PUTATIVE BASAL-BODY ROD MODIFICATION PROTEIN&Oligo status:all filters passed&-&Well:32A22...	0.00183183	-0.462293	10.3291	8
Sm_intergen_3183	-&pSymB_ig_570_rc (546 bp, from 1576499 to 1575954) ( position: 239 to 288 )&Oligo status:uniqueness filter failed for at least one oligo in intergenic region&-&Well:16O7...	0.0324547	-0.46375	8.30015	8
SMc03965	ruvB&PROBABLE HOLLIDAY JUNCTION DNA HELICASE PROTEIN&Oligo status:all filters passed&-&Well:34O11...	0.00654907	-0.464238	8.22237	8
SMc03025	fliI&FLAGELLUM-SPECIFIC ATP SYNTHASE PROTEIN&Oligo status:all filters passed&-&Well:32M19...	0.00271506	-0.468307	9.39269	8
Sm_intergen_7031	-&S._meliloti_chromosome_ig_654 (662 bp, from 1456291 to 1456952) ( position: 150 to 199 )&Oligo status:all filters passed&-&Well:33A21...	0.0237993	-0.471524	10.5558	8
SMc03043	motC&CHEMOTAXIS PRECURSOR (MOTILITY PROTEIN C) TRANSMEMBRANE&Oligo status:all filters passed&-&Well:32A04...	0.000644276	-0.474514	8.81956	8
Sm_intergen_5944	-&S._meliloti_chromosome_ig_312_rc (708 bp, from 702172 to 701465) ( position: 417 to 466 )&Oligo status:all filters passed&-&Well:29B1...	0.00480828	-0.479178	9.57005	8
SMa0281	-&putative regulator, MerR family&Oligo status:all filters passed&-&Well:1I04...	0.00249612	-0.486463	10.2391	8
SMc03040	flaC&FLAGELLIN PROTEIN&Oligo status:all filters passed&-&Well:32O19...	1.76075e-05	-0.495195	9.80385	8
SMb21489	cyoC&putative cytochrome o ubiquinol oxidase chain III protein&Oligo status:all filters passed&-&Well:14B18...	0.00837017	-0.496379	10.8845	8
SMc00821	-&HYPOTHETICAL PROTEIN&Oligo status:all filters passed&-&Well:20N16...	1.16777e-05	-0.497472	11.707	8
Sm_intergen_7382	-&S._meliloti_chromosome_ig_756_rc (155 bp, from 1681005 to 1680851) ( position: 38 to 87 )&Oligo status:all filters passed&-&Well:35P18...	0.000970555	-0.498204	10.6273	8
Sm_intergen_2561	-&pSymB_ig_332_rc (117 bp, from 935353 to 935237) ( position: 28 to 77 )&Oligo status:all filters passed&-&Well:13A17...	0.00379963	-0.498955	8.34356	8
SMc01365	rnr&PUTATIVE EXORIBONUCLEASE II PROTEIN&Oligo status:all filters passed&-&Well:23J11...	0.00349919	-0.49993	9.65825	8
SMc01842	-&PUTATIVE METHYLTRANSFERASE TRANSCRIPTION REGULATOR PROTEIN&Oligo status:all filters passed&-&Well:26F21...	0.00711179	-0.505366	8.56288	8
SMc00638	-&PUTATIVE HEAT RESISTANT AGGLUTININ 1 PROTEIN&Oligo status:all filters passed&-&Well:20C14...	0.0169368	-0.51212	8.77486	8
Sm_intergen_2882	-&pSymB_ig_462 (252 bp, from 1306524 to 1306775) ( position: 99 to 148 )&Oligo status:all filters passed&-&Well:15B13...	4.2777e-05	-0.518572	9.99203	8
SMa1822	-&Hypothetical protein&Oligo status:all filters passed&-&Well:5G12...	0.00700498	-0.520589	9.33847	8
SMc01719	mcpT&PROBABLE CHEMORECEPTOR (METHYL-ACCEPTING CHEMOTAXIS) TRANSMEMBRANE PROTEIN&Oligo status:all filters passed&-&Well:26F06...	0.00809155	-0.530628	9.49643	8
Sm_intergen_7237	-&S._meliloti_chromosome_ig_713 (147 bp, from 1587252 to 1587398) ( position: 96 to 145 )&Oligo status:all filters passed&-&Well:35O9...	2.78292e-05	-0.5315	9.90618	8
Sm_intergen_6425	-&S._meliloti_chromosome_ig_450_rc (130 bp, from 1012771 to 1012642) ( position: 46 to 95 )&Oligo status:all filters passed&-&Well:31C7...	0.000570521	-0.531864	9.797	8
SMc00159	-&HYPOTHETICAL SIGNAL PEPTIDE PROTEIN&Oligo status:all filters passed&-&Well:17E08...	0.0047748	-0.545626	8.08327	8
Sm_intergen_5982	-&S._meliloti_chromosome_ig_321 (319 bp, from 735467 to 735785) ( position: 168 to 217 )&Oligo status:all filters passed&-&Well:29H3...	0.0043885	-0.545831	8.97187	8
Sm_intergen_2530	-&pSymB_ig_32_rc (473 bp, from 81239 to 80767) ( position: 236 to 285 )&Oligo status:all filters passed&-&Well:13B15...	0.00146381	-0.54807	8.98076	8
SMc03941	-&CONSERVED HYPOTHETICAL TRANSMEMBRANE PROTEIN&Oligo status:all filters passed&-&Well:34M09...	7.49067e-05	-0.553307	10.5574	8
SMc00246	qor&PROBABLE QUINONE OXIDOREDUCTASE PROTEIN&Oligo status:all filters passed&-&Well:17M20...	0.0281591	-0.554486	9.77889	8
Sm_intergen_3952	-&S._meliloti_chromosome_ig_1207_rc (125 bp, from 2578415 to 2578291) ( position: 19 to 68 )&Oligo status:all filters passed&-&Well:19J20...	0.00580768	-0.55466	9.94335	8
SMc00180	hemF&PROBABLE COPROPORPHYRINOGEN III OXIDASE, AEROBIC PROTEIN&Oligo status:all filters passed&-&Well:17G22...	0.0319914	-0.55873	9.28287	8
Sm_intergen_4996	-&S._meliloti_chromosome_ig_1529_rc (124 bp, from 3313082 to 3312959) ( position: 63 to 112 )&Oligo status:all filters passed&-&Well:24N13...	0.017097	-0.560121	11.6073	8
Sm_intergen_4415	-&S._meliloti_chromosome_ig_1345 (410 bp, from 2919890 to 2920299) ( position: 359 to 408 )&Oligo status:all filters passed&-&Well:22I1...	0.000207936	-0.563259	10.8032	8
SMc02499	atpA&PROBABLE ATP SYNTHASE ALPHA CHAIN PROTEIN&Oligo status:all filters passed&-&Well:30M23...	0.0246267	-0.571938	12.2908	8
SMc00283	-&PUTATIVE TRANSCRIPTION REGULATOR PROTEIN&Oligo status:all filters passed&-&Well:38E13...	0.00095066	-0.578584	9.24463	8
SMc03019	fliG&FLAGELLAR MOTOR SWITCH PROTEIN&Oligo status:all filters passed&-&Well:32M07...	0.00019118	-0.582698	8.80151	8
SMc03042	motB&CHEMOTAXIS (MOTILITY PROTEIN B) TRANSMEMBRANE&Oligo status:all filters passed&-&Well:32O23...	0.00176986	-0.585796	8.58201	8
SMc02500	atpG&PROBABLE ATP SYNTHASE GAMMA CHAIN PROTEIN&Oligo status:all filters passed&-&Well:30O01...	0.00555779	-0.590588	10.6803	8
SMc03158	-&PUTATIVE PERMEASE ABC TRANSPORTER PROTEIN&Oligo status:all filters passed&-&Well:32B04...	0.00364111	-0.602216	9.89328	8
Sm_intergen_6290	-&S._meliloti_chromosome_ig_398 (369 bp, from 894880 to 895248) ( position: 134 to 183 )&Oligo status:all filters passed&-&Well:29L22...	0.000752684	-0.602381	9.32395	8
Sm_intergen_6102	-&S._meliloti_chromosome_ig_35 (7090 bp, from 81030 to 88119) ( position: 6528 to 6577 ), rRNA operon&Oligo status:uniqueness filter failed for at least one oligo in intergenic region&-&Well:29P10...	0.0193177	-0.603357	13.9555	8
SMc02479	mdh&PROBABLE MALATE DEHYDROGENASE PROTEIN&Oligo status:all filters passed&-&Well:30K07...	0.0251056	-0.616943	11.6063	8
SMc02897	-&PUTATIVE CYTOCHROME C TRANSMEMBRANE PROTEIN&Oligo status:all filters passed&-&Well:32C19...	0.000430185	-0.618699	10.6361	8
SMc02820	cpaF1&PUTATIVE PILUS ASSEMBLY PROTEIN&Oligo status:all filters passed&-&Well:30H17...	0.042882	-0.619433	8.55545	8
SMb20651	-&HYPOTHETICAL PROTEIN&Oligo status:all filters passed&-&Well:9F22...	0.00173633	-0.623191	8.47643	8
SMb20764	phnL&putative phosphonate uptake ABC transporter ATP-binding protein&Oligo status:all filters passed&-&Well:9F13...	0.000564469	-0.624417	10.5007	8
SMc03013	-&CONSERVED HYPOTHETICAL PROTEIN&Oligo status:all filters passed&-&Well:32K19...	4.085e-05	-0.644744	9.25576	8
SMc00097	gst2&PUTATIVE GLUTATHIONE S-TRANSFERASE PROTEIN&Oligo status:all filters passed&-&Well:17K19...	2.66524e-05	-0.662696	11.1012	8
SMc03057	-&CONSERVED HYPOTHETICAL TRANSMEMBRANE PROTEIN&Oligo status:all filters passed&-&Well:32C08...	0.00105992	-0.666371	9.44346	8
SMc03044	motD&CHEMOTAXIS PROTEIN (MOTILITY PROTEIN D)&Oligo status:all filters passed&-&Well:32A06...	5.04387e-06	-0.671533	8.3618	8
Sm_intergen_5625	-&S._meliloti_chromosome_ig_20_rc (158 bp, from 47837 to 47680) ( position: 108 to 157 )&Oligo status:all filters passed&-&Well:27C5...	3.97383e-06	-0.672245	10.79	8
Sm_intergen_6232	-&S._meliloti_chromosome_ig_373 (212 bp, from 842829 to 843040) ( position: 100 to 149 )&Oligo status:all filters passed&-&Well:29B19...	0.00136967	-0.682018	10.4934	8
SMc01109	metK&PROBABLE S-ADENOSYLMETHIONINE SYNTHETASE PROTEIN&Oligo status:all filters passed&-&Well:23C08...	0.0385829	-0.696984	11.4373	8
SMc00888	-&PUTATIVE CONTAINS A 2-COMPONENT RECEIVER DOMAIN PROTEIN&Oligo status:all filters passed&-&Well:20F21...	0.000105671	-0.702958	8.73437	8
SMc04164	-&HYPOTHETICAL PROTEIN&Oligo status:all filters passed&-&Well:36B05...	0.00195453	-0.712813	12.394	8
Sm_intergen_7359	-&S._meliloti_chromosome_ig_752 (876 bp, from 1674761 to 1675636) ( position: 761 to 810 )&Oligo status:all filters passed&-&Well:35I17...	0.0106468	-0.715983	10.7336	8
Sm_intergen_8037	-&S._meliloti_chromosome_ig_983 (125 bp, from 2153900 to 2154024) ( position: 23 to 72 )&Oligo status:all filters passed&-&Well:39O11...	2.39073e-05	-0.742443	11.7495	8
SMa2245	-&conserved hypothetical protein&Oligo status:all filters passed&-&Well:5H11...	0.00700978	-0.744284	8.89023	8
SMc02755	ahcY&PROBABLE ADENOSYLHOMOCYSTEINASE PROTEIN&Oligo status:all filters passed&-&Well:30P04...	0.0182106	-0.754874	11.7649	8
SMc01104	mcpX&PROBABLE CHEMORECEPTOR (METHYL-ACCEPTING CHEMOTAXIS) TRANSMEMBRANE PROTEIN&Oligo status:all filters passed&-&Well:23A22...	0.00294526	-0.775201	9.13214	8
SMc03048	flgK&PUTATIVE FLAGELLAR HOOK-ASSOCIATED PROTEIN&Oligo status:all filters passed&-&Well:32A14...	7.3555e-05	-0.786296	8.62076	8
SMc00433	iolE&PUTATIVE MYO-INOSITOL CATABOLISM PROTEIN&Oligo status:all filters passed&-&Well:17H23...	0.000699807	-0.792911	10.901	8
SMb21630	-&conserved hypothetical protein&Oligo status:all filters passed&-&Well:14F03...	0.00202344	-0.80867	10.9202	8
SMb20714	-&putative sugar uptake ABC transporter permease protein&Oligo status:all filters passed&-&Well:9P20...	0.0143914	-0.811334	9.95476	8
SMc00765	mcpZ&PROBABLE METHYL-ACCEPTING CHEMOTAXIS PROTEIN&Oligo status:all filters passed&-&Well:20F04...	7.1961e-07	-0.815184	8.78215	8
SMc03047	flgE&FLAGELLAR HOOK PROTEIN&Oligo status:all filters passed&-&Well:32A12...	2.13949e-05	-0.822158	10.1253	8
SMb21487	cyoA&putative cytochrome o ubiquinol oxidase chain II protein&Oligo status:all filters passed&-&Well:14B14...	5.89138e-06	-0.83259	10.8802	8
SMc03024	flgF&FLAGELLAR BASAL-BODY ROD PROTEIN&Oligo status:all filters passed&-&Well:32M17...	6.89272e-06	-0.84675	8.29334	8
SMc00247	pcs&PHOSPHATIDYLCHOLINE SYNTHASE PROTEIN&Oligo status:all filters passed&-&Well:17M22...	0.00763554	-0.852844	8.41197	8
SMc02480	sucC&PROBABLE SUCCINYL-COA SYNTHETASE BETA CHAIN PROTEIN&Oligo status:all filters passed&-&Well:30K09...	0.0190243	-0.874213	10.5196	8
SMc01165	iolC&PUTATIVE SUGAR KINASE PROTEIN&Oligo status:all filters passed&-&Well:23K24...	0.0126139	-0.874875	9.32763	8
Sm_intergen_6376	-&S._meliloti_chromosome_ig_430 (285 bp, from 963337 to 963621) ( position: 131 to 180 )&Oligo status:all filters passed&-&Well:31B4...	1.40625e-05	-0.888766	8.80497	8
SMc02255	qxtA&PUTATIVE QUINOL OXIDASE SUBUNIT I TRANSMEMBRANE PROTEIN&Oligo status:all filters passed&-&Well:28N06...	1.78551e-05	-0.893662	8.52735	8
SMc03039	flaD&PROBABLE FLAGELLIN D PROTEIN&Oligo status:all filters passed&-&Well:32O17...	0.00218953	-0.925296	10.2856	8
SMb20712	mocB&putative rhizopine uptake ABC transporter periplasmic solute-binding protein precursor&Oligo status:all filters passed&-&Well:9P16...	0.00879648	-0.928227	11.9367	8
SMc00975	mcpU&PROBABLE CHEMORECEPTOR (METHYL-ACCEPTING CHEMOTAXIS) TRANSMEMBRANE PROTEIN&Oligo status:all filters passed&-&Well:23C01...	4.59915e-05	-0.929188	9.86914	8
Sm_intergen_5942	-&S._meliloti_chromosome_ig_312 (708 bp, from 701465 to 702172) ( position: 487 to 536 )&Oligo status:all filters passed&-&Well:27P24...	0.000137246	-0.94037	9.4686	8
SMc02514	-&PUTATIVE PERIPLASMIC BINDING ABC TRANSPORTER PROTEIN&Oligo status:all filters passed&-&Well:30A08...	0.000727137	-0.953599	10.27	8
SMc03029	fliE&FLAGELLAR HOOK-BASAL BODY COMPLEX PROTEIN&Oligo status:all filters passed&-&Well:38O07...	0.000459576	-0.959799	9.44747	8
Sm_intergen_3012	-&pSymB_ig_506 (342 bp, from 1412127 to 1412468) ( position: 100 to 149 )&Oligo status:all filters passed&-&Well:15D21...	0.000207243	-0.966167	9.56592	8
SMc03030	flgG&FLAGELLAR BASAL-BODY ROD PROTEIN&Oligo status:all filters passed&-&Well:32O03...	5.57054e-05	-0.983048	9.43632	8
SMc00432	iolB&PUTATIVE MYO-INOSITOL CATABOLISM PROTEIN&Oligo status:all filters passed&-&Well:17H21...	0.0117035	-0.994423	11.1571	8
SMc00781	iolA&PUTATIVE MALONIC SEMIALDEHYDE OXIDATIVE DECARBOXYLASE PROTEIN&Oligo status:all filters passed&-&Well:20H12...	0.0150828	-1.03975	11.7418	8
Sm_intergen_6053	-&S._meliloti_chromosome_ig_349 (117 bp, from 801200 to 801316) ( position: 62 to 111 )&Oligo status:all filters passed&-&Well:29O7...	0.00586129	-1.04402	10.7449	8
Sm_intergen_3120	-&pSymB_ig_548 (241 bp, from 1514090 to 1514330) ( position: 100 to 149 )&Oligo status:all filters passed&-&Well:16P3...	0.00658375	-1.04485	11.996	8
Sm_intergen_3122	-&pSymB_ig_549 (209 bp, from 1515259 to 1515467) ( position: 90 to 139 )&Oligo status:all filters passed&-&Well:16B4...	0.000101318	-1.08701	9.77301	8
SMb20072	-&putative rhizopine binding protein&Oligo status:all filters passed&-&Well:7O13...	0.0146405	-1.1125	11.1798	8
SMb20713	-&putative sugar uptake ABC transporter ATP-binding protein&Oligo status:all filters passed&-&Well:9P18...	0.00879392	-1.114	9.82442	8
SMc04114	pilA1&PUTATIVE PILIN SUBUNIT PROTEIN&Oligo status:all filters passed&-&Well:36P24...	0.000303195	-1.1625	11.0098	8
Sm_intergen_5478	-&S._meliloti_chromosome_ig_166_rc (173 bp, from 381949 to 381777) ( position: 100 to 149 )&Oligo status:all filters passed&-&Well:25P19...	0.000420171	-1.16421	11.387	8
Sm_intergen_5451	-&S._meliloti_chromosome_ig_165_rc (156 bp, from 380875 to 380720) ( position: 94 to 143 )&Oligo status:all filters passed&-&Well:25E18...	4.52827e-05	-1.19489	10.9864	8
SMc01166	iolD&PUTATIVE MALONIC SEMIALDEHYDE OXIDATIVE DECARBOXYLASE PROTEIN&Oligo status:all filters passed&-&Well:23M02...	0.000496253	-1.19641	10.7384	8
Sm_intergen_5503	-&S._meliloti_chromosome_ig_167_rc (121 bp, from 385924 to 385804) ( position: 50 to 99 )&Oligo status:all filters passed&-&Well:25I21...	0.000209714	-1.24668	10.5315	8
SMc03051	flbT&PUTATIVE FLAGELLIN SYNTHESIS REPRESSOR PROTEIN&Oligo status:all filters passed&-&Well:32A20...	0.00102369	-1.3214	10.1959	8
SMc03046	-&PUTATIVE TRANSCRIPTION REGULATOR PROTEIN&Oligo status:all filters passed&-&Well:32A10...	0.000343173	-1.36161	9.19971	8
SMc03027	flgB&FLAGELLAR BASAL-BODY ROD PROTEIN&Oligo status:all filters passed&-&Well:32M23...	2.3359e-05	-1.55662	8.51448	8
SMc03049	flgL&PUTATIVE FLAGELLAR HOOK-ASSOCIATED PROTEIN&Oligo status:all filters passed&-&Well:32A16...	0.00012271	-1.55763	9.22051	8
SMc03037	flaA&FLAGELLIN A PROTEIN&Oligo status:uniqueness filter failed&-&Well:38O09...	7.13829e-08	-2.5082	11.5381	8
Sm_intergen_5974	-&S._meliloti_chromosome_ig_318 (272 bp, from 731014 to 731285) ( position: 119 to 168 )&Oligo status:all filters passed&-&Well:29P2...	2.36072e-08	-2.62316	10.8492	8
SMc03038	flaB&FLAGELLIN B PROTEIN&Oligo status:uniqueness filter failed&-&Well:38O11...	1.25926e-07	-2.7946	10.9719	8
